# Supplementary material for: Organic photoredox catalytic α-C(sp3)–H phosphorylation of saturatedaza-heterocycles
Source: Royal Society of Chemistry journal article supplement (doi:10.1039/d1cc05767g), 2021-01-01
Supplement: d1cc05767g1.pdf [file d1cc05767g1.pdf]

## Supporting Information

### Organic Photoredox Catalytic $\alpha$ -C(sp<sup>3</sup>)-H Phosphorylation of Saturated Aza-Heterocycles

Ming-Jun Yi, ‡<sup>[a]</sup> Teng-Fei Xiao, ‡<sup>[a]</sup> Wen-Hui Li, <sup>[a]</sup> Yi-Fan Zhang, <sup>[a]</sup> Pen-Ji Yan, <sup>[b]</sup>

Baoxin Zhang, <sup>[a]</sup> Peng-Fei Xu,<sup>[a][c]</sup> and Guo-Qiang Xu\*<sup>[a]</sup>

<sup>[a]</sup> State Key Laboratory of Applied Organic Chemistry, College of Chemistry and Chemical Engineering, Lanzhou University, Lanzhou 730000 (P.R. China).

<sup>[b]</sup> Key Laboratory of Hexi Corridor Resources Utilization of Gansu Universities, College of Chemistry and Chemical Engineering, Hexi University, Zhangye 734000, (P.R. China)

<sup>[c]</sup> State Key Laboratory of Veterinary Etiological Biology, College of Veterinary Medicine, Lanzhou University, Lanzhou 730000 (P.R. China)

\*Corresponding author (s): gqxu@lzu.edu.cn

*Supporting Information Placeholder*

#### **This PDF file includes**

Materials and Methods

Figures S1 to S13

Tables S1 to S6

NMR Spectra

References

## Table of Contents

|                                                                           |     |
|---------------------------------------------------------------------------|-----|
| 1. General information .....                                              | 3   |
| 2. Synthesis of substrates .....                                          | 3   |
| 3. Screening of reaction conditions .....                                 | 9   |
| 4. General procedure for the synthesis of product 3 and analytical data.. | 11  |
| 5. Gram-scale reaction .....                                              | 35  |
| 6. Transformations of product .....                                       | 36  |
| 7. Mechanistic investigations.....                                        | 37  |
| 8. X-Ray crystallographic data of product 3h: .....                       | 46  |
| 9. Mechanistic computational analysis .....                               | 47  |
| 10. NMR spectra of compound.....                                          | 74  |
| 11. References.....                                                       | 135 |

## 1. General information

All glassware was thoroughly oven-dried. Chemicals and solvents were either purchased from commercial suppliers or purified by standard techniques. Thin-layer chromatography (TLC) plates were visualized by exposure to ultraviolet light and/or staining with phosphomolybdic acid followed by heating on a hot plate. Flash chromatography was carried out using silica gel (200-300 mesh).  $^1\text{H}$  NMR and  $^{13}\text{C}$  NMR spectra were recorded on a Bruker AM-400 (400 MHz) or Agilent Inova 600 MHz. The spectra were recorded in  $\text{CDCl}_3$  as solvent at room temperature,  $^1\text{H}$  and  $^{13}\text{C}$  NMR chemical shifts are reported in ppm relative to the residual solvent peak. The residual solvent signals were used as references and the chemical shifts were converted to the TMS scale ( $\text{CDCl}_3$ :  $\delta_{\text{H}} = 7.26$  ppm,  $\delta_{\text{C}} = 77.00$  ppm). Data for  $^1\text{H}$  NMR are reported as follows: chemical shift ( $\delta$  ppm), multiplicity (s = singlet, d = doublet, t = triplet, q=quartet, m = multiplet, dd = doublet), integration, coupling constant (Hz) and assignment. Data for  $^{13}\text{C}$  NMR are reported as chemical shift. HRMS were performed on a Bruker Apex II mass instrument (ESI).

## 2. Synthesis of substrates

### 2.1 Synthesis of Cyclic Amines

Cyclic amines were synthesized according to reported procedures with some modifications. <sup>[1]</sup>

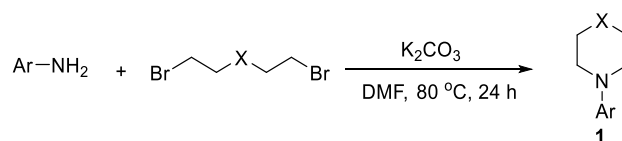

**General procedure:**  $\text{K}_2\text{CO}_3$  (1.52 g, 11 mmol, 1.1 equiv.) was weighed into an oven-dried 25 mL round-bottom flask with magnetic stirring and DMF (10 mL, 1.0 M) was added. The appropriate aniline (10 mmol, 1.0 equiv.) was added into the reaction mixture *via* syringes. The reaction system was degassed (10 min) and backfilled with nitrogen. The corresponding dibromide (11 mmol, 1.1 equiv.) was added, and the reaction mixture was heated to 80 °C for 24 h. After completion, the reaction mixture

was cooled to rt and diluted with EtOAc (20 mL) and H<sub>2</sub>O (20 mL). The layers were separated, and the organic layer was extracted with 1 N HCl (3 x 10 mL). The acid layers were combined and adjusted to pH = 8 with 1N NaOH and then extracted with EtOAc (3 x 10 mL). The organic layers were washed with brine (10 mL), dried over anhydrous Na<sub>2</sub>SO<sub>4</sub>, filtered, concentrated, and purified by flash chromatography.

## 2.2 Synthesis of diphenylphosphine oxide

Phosphine Oxides were synthesized according to reported procedures with some modifications.<sup>[2]</sup>

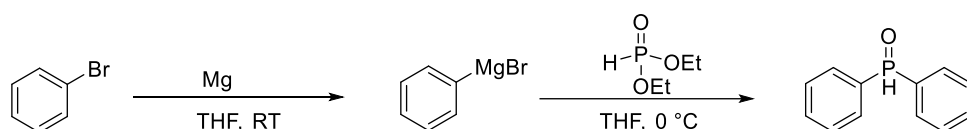

**General procedure:** Diethylphosphite (1.29 mL, 10.0 mmol) was added dropwise at 0 °C to a solution of phenylmagnesium bromide in tetrahydrofuran which was prepared from aryl bromides (32.6 mmol) and magnesium (0.95 g, 39.6 mmol). The mixture was aged for 30 minutes at 0 °C, then stirred at ambient temperature for 16 hours. After that it was cooled again to 0 °C, and 75 mL NH<sub>4</sub>Cl aqueous was then added slowly. The mixture was extracted with diethyl ether and the organic phase was washed with NaHCO<sub>3</sub> aqueous and brine, then it was dried over Na<sub>2</sub>SO<sub>4</sub>. After the solvent had been completely removed, the residue was purified by column chromatography on silica gel to give the product.

## 2.3 Synthesis and Characterization of Photocatalyst

### 2.3.1 Synthesis of DCQ

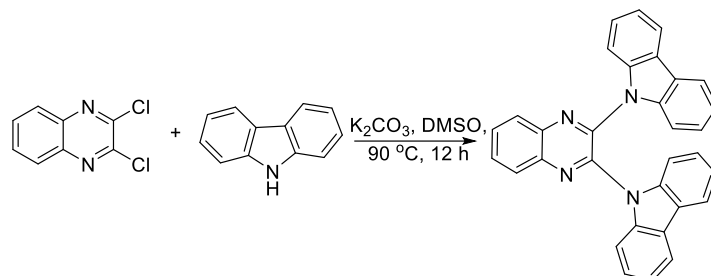

**General procedure:** A mixture of carbazole (2.1 mmol) and K<sub>2</sub>CO<sub>3</sub> (2.2 mmol) dissolved in 7 mL DMSO and stirred for 20 min, then 2,3-dichloroquinoxaline (1 mmol) was added and the reaction mixture was stirred at 90 °C for 7 h. After completion, the

reaction mixture was cooled to room temperature, added 100 mL brine to the mixture and filtered. The crude compound was purified by flash column chromatography (n-Hexane/ethyl acetate 10:1) to give green crystals. 369 mg, 78% yield,  $R_f = 0.71$  (PE:EA = 10:1); mp= 151-152 °C.

## 2.2 Characterization of Photocatalyst

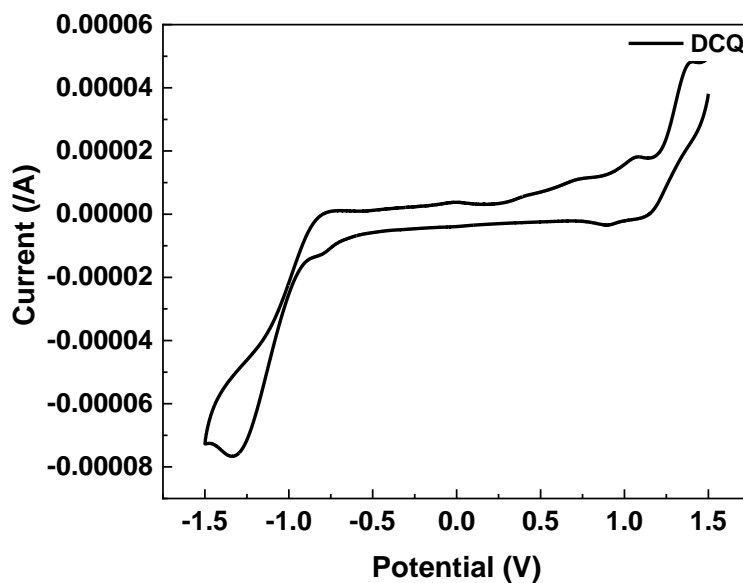

**Figure S1.** Cyclic voltammograms of DCQ. Recorded in MeCN containing 0.1 M *n*-Bu<sub>4</sub>NPF<sub>6</sub> at 25 ± 2 °C at a 1 mm diameter GC electrode for 1 mM solutions of the analytes.

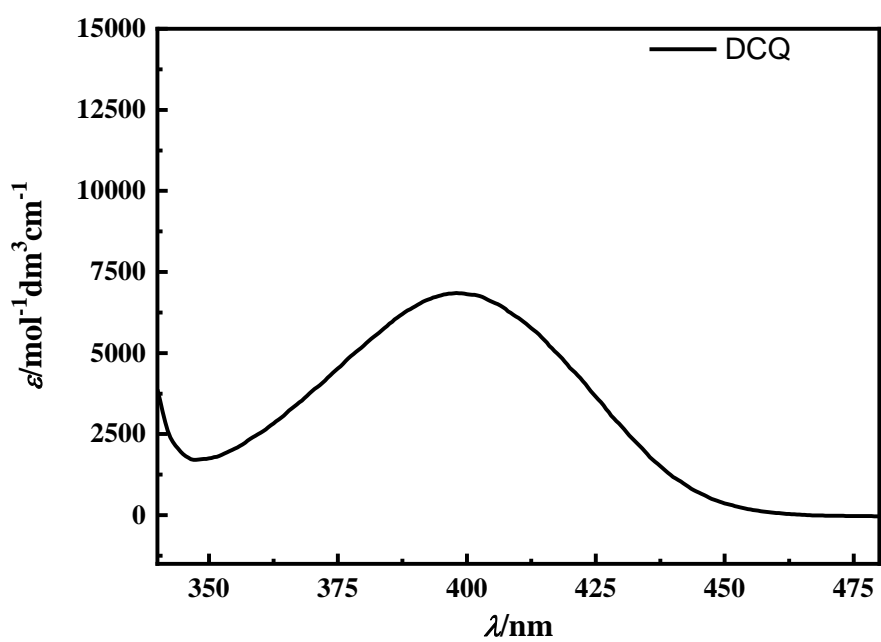

Figure S2. UV-vis spectrum of DCQ in toluene  $3 \times 10^{-4}$  M.

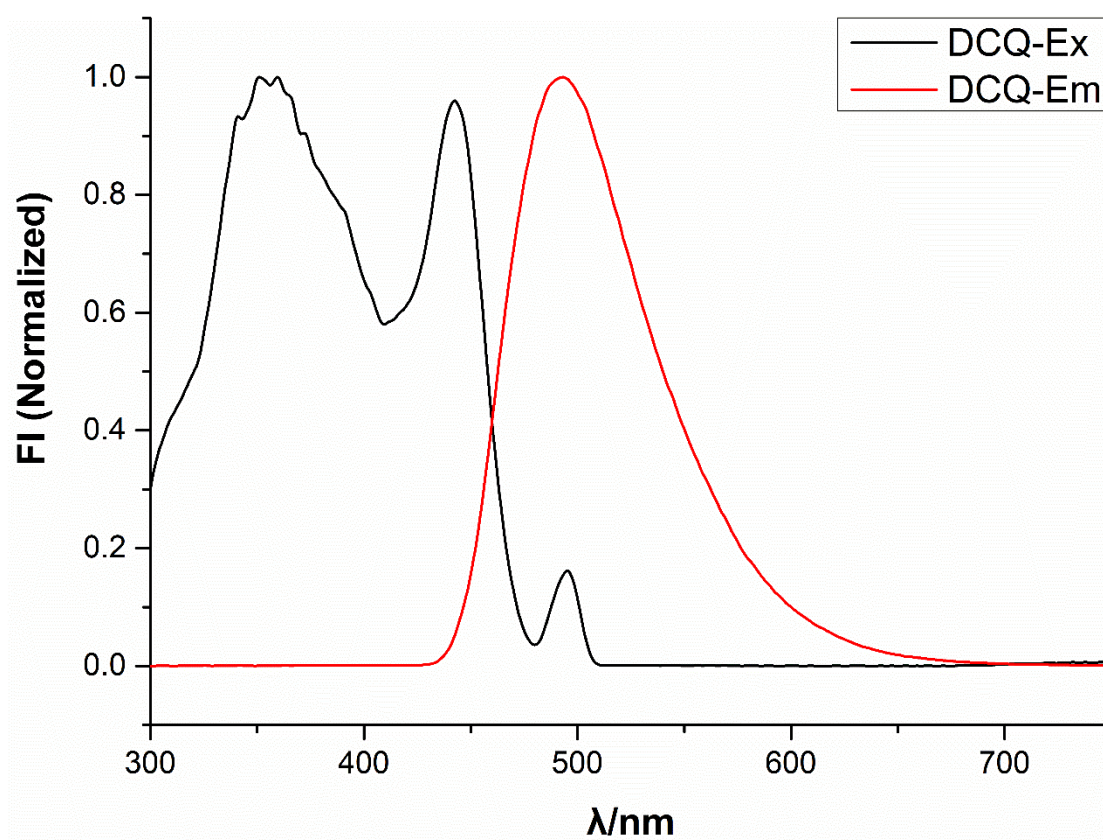

Figure S3. Excitation and emission spectra of DCQ in toluene.

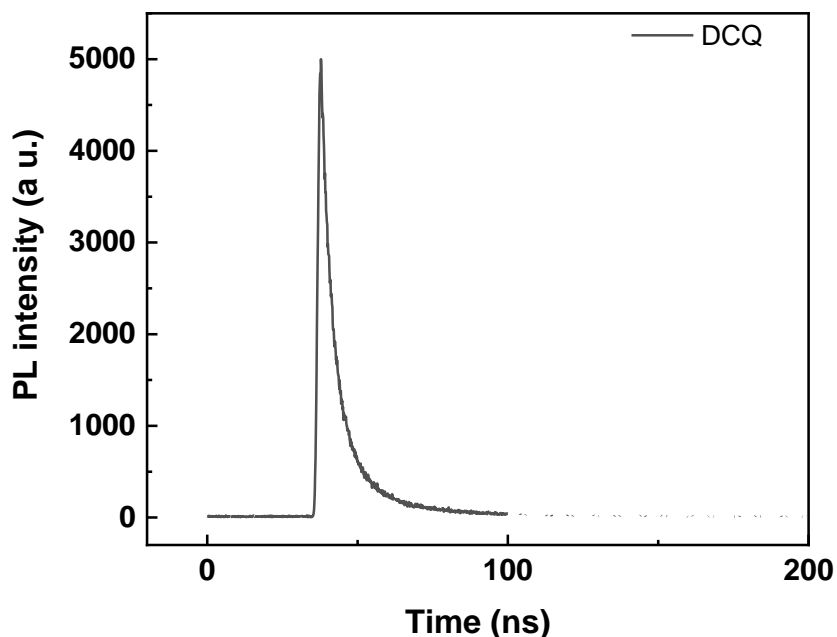

**Figure S4.** Transient emission decay profiles of DCQ.

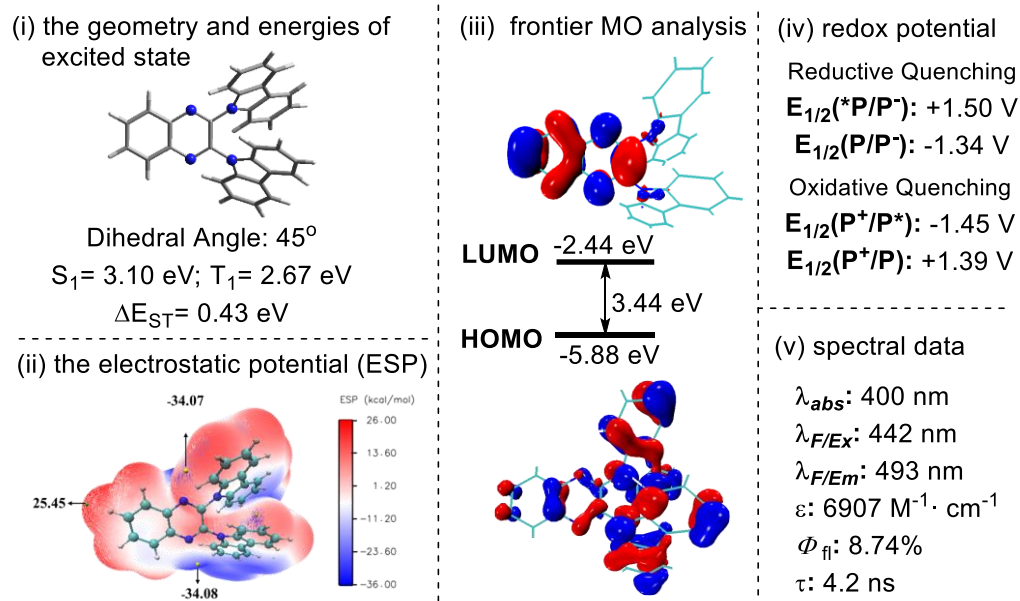

**Figure S5.** Characterization of DCQ.

DCQ HOMO-LUMO at B3PW91/def2TZVP level

| Center Number | Atomic Number | Atomic Type | Coordinates (Angstroms) |           |           |
|---------------|---------------|-------------|-------------------------|-----------|-----------|
|               |               |             | X                       | Y         | Z         |
| 1             | 6             | 0           | 1.290238                | -0.659990 | -0.301011 |

|    |   |   |           |           |           |
|----|---|---|-----------|-----------|-----------|
| 2  | 6 | 0 | 3.576351  | -0.669576 | -0.233377 |
| 3  | 6 | 0 | 3.576405  | 0.669354  | 0.233334  |
| 4  | 6 | 0 | 1.290298  | 0.659923  | 0.301014  |
| 5  | 1 | 0 | 4.779621  | -2.358628 | -0.816032 |
| 6  | 6 | 0 | 4.805475  | -1.334669 | -0.456903 |
| 7  | 6 | 0 | 4.805578  | 1.334346  | 0.456883  |
| 8  | 6 | 0 | 5.986039  | 0.670982  | 0.228109  |
| 9  | 6 | 0 | 5.985988  | -0.671408 | -0.228093 |
| 10 | 1 | 0 | 4.779809  | 2.358309  | 0.816008  |
| 11 | 1 | 0 | 6.932186  | 1.174070  | 0.400501  |
| 12 | 1 | 0 | 6.932096  | -1.174573 | -0.400463 |
| 13 | 7 | 0 | 2.404505  | -1.302330 | -0.516651 |
| 14 | 7 | 0 | 2.404606  | 1.302205  | 0.516580  |
| 15 | 6 | 0 | -0.261412 | -2.600259 | -0.243493 |
| 16 | 6 | 0 | -0.981729 | -0.747411 | -1.348018 |
| 17 | 6 | 0 | 0.474201  | -3.534355 | 0.486165  |
| 18 | 6 | 0 | -1.590564 | -2.848732 | -0.643818 |
| 19 | 6 | 0 | -1.062819 | 0.474312  | -2.015479 |
| 20 | 6 | 0 | -2.049119 | -1.667450 | -1.351366 |
| 21 | 6 | 0 | -0.153199 | -4.734395 | 0.802961  |
| 22 | 1 | 0 | 1.498040  | -3.339027 | 0.784225  |
| 23 | 6 | 0 | -2.197920 | -4.062926 | -0.315574 |
| 24 | 6 | 0 | -2.265494 | 0.785835  | -2.638229 |
| 25 | 1 | 0 | -0.222184 | 1.159350  | -2.057446 |
| 26 | 6 | 0 | -3.246690 | -1.336102 | -1.989741 |
| 27 | 6 | 0 | -1.472860 | -5.001288 | 0.407619  |
| 28 | 1 | 0 | 0.396580  | -5.482187 | 1.366392  |
| 29 | 1 | 0 | -3.221952 | -4.262965 | -0.617672 |
| 30 | 6 | 0 | -3.351801 | -0.102738 | -2.619593 |
| 31 | 1 | 0 | -2.359510 | 1.737269  | -3.152977 |
| 32 | 1 | 0 | -4.077480 | -2.035888 | -1.994422 |
| 33 | 1 | 0 | -1.928847 | -5.950532 | 0.670304  |
| 34 | 1 | 0 | -4.276857 | 0.173072  | -3.115711 |
| 35 | 6 | 0 | -0.261179 | 2.600267  | 0.243525  |
| 36 | 6 | 0 | -0.981642 | 0.747486  | 1.348080  |
| 37 | 6 | 0 | 0.474507  | 3.534283  | -0.486153 |
| 38 | 6 | 0 | -1.590328 | 2.848833  | 0.643806  |
| 39 | 6 | 0 | -1.062819 | -0.474205 | 2.015599  |
| 40 | 6 | 0 | -2.048982 | 1.667592  | 1.351376  |
| 41 | 6 | 0 | -0.152814 | 4.734350  | -0.803006 |
| 42 | 1 | 0 | 1.498349  | 3.338899  | -0.784181 |
| 43 | 6 | 0 | -2.197611 | 4.063041  | 0.315490  |
| 44 | 6 | 0 | -2.265542 | -0.785638 | 2.638308  |
| 45 | 1 | 0 | -0.222216 | -1.159277 | 2.057663  |



|    |   |   |           |           |           |
|----|---|---|-----------|-----------|-----------|
| 46 | 6 | 0 | -3.246603 | 1.336331  | 1.989706  |
| 47 | 6 | 0 | -1.472471 | 5.001336  | -0.407719 |
| 48 | 1 | 0 | 0.397037  | 5.482082  | -1.366446 |
| 49 | 1 | 0 | -3.221639 | 4.263146  | 0.617556  |
| 50 | 6 | 0 | -3.351807 | 0.102992  | 2.619594  |
| 51 | 1 | 0 | -2.359619 | -1.737041 | 3.153102  |
| 52 | 1 | 0 | -4.077355 | 2.036163  | 1.994320  |
| 53 | 1 | 0 | -1.928398 | 5.950594  | -0.670457 |
| 54 | 1 | 0 | -4.276895 | -0.172745 | 3.115694  |
| 55 | 7 | 0 | 0.092604  | -1.304724 | -0.644941 |
| 56 | 7 | 0 | 0.092739  | 1.304733  | 0.645023  |

-----  
0 imaginary frequencies

Zero-point Energies= -1449.548233  
 Thermal Energies= -1449.523463  
 Thermal Enthalpies= -1449.522519  
 Thermal Free Energies= -1449.602659

### 3. Screening of reaction conditions

**Table S1.** Optimization of the photocatalyst.<sup>a</sup>

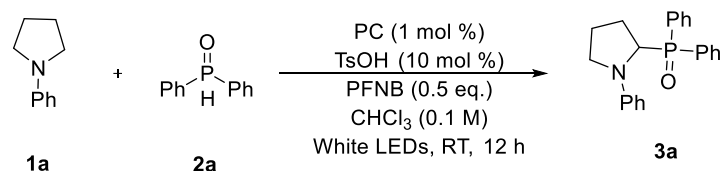

| Entry | PC (mol %)           | Yield (%) <sup>b</sup> |
|-------|----------------------|------------------------|
| 1     | Cz-NI-Ph             | 76                     |
| 2     | Cz-NI-Me             | 81                     |
| 3     | Cz-NI                | 71                     |
| 4     | DCQ                  | 83                     |
| 5     | DCQ- <sup>t</sup> Bu | 82                     |
| 6     | dF-DCQ               | 32                     |

<sup>a</sup>Reaction conditions: **1a** (0.1 mmol), **2a** (0.15 mmol), PFNB (0.5 eq.), TsOH (10 mol %) and photocatalyst (1 mol %) in CHCl<sub>3</sub> (1 mL) at 25 °C for 12 h under irradiation with white light.

<sup>b</sup>Isolated yield after chromatography. PFNB = pentafluoronitrobenzene.

**Table S2.** Optimization of the loading of **2a**.<sup>a</sup>

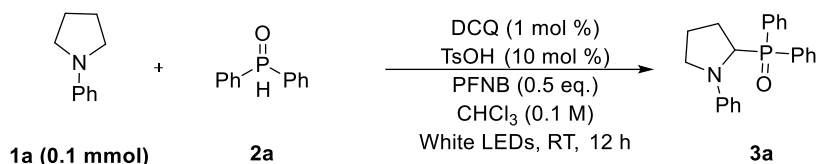

| Entry | 2a                 | Yield (%) <sup>b</sup> |
|-------|--------------------|------------------------|
| 1     | 0.1 mmol (1.0 eq.) | 30                     |
| 2     | 0.2 mmol (2.0 eq.) | 56                     |

<sup>a</sup>Reaction conditions: **1a** (0.1 mmol), **2a**, PFNB (0.5 eq.), TsOH (10 mol %) and DCQ (1 mol %) in CHCl<sub>3</sub> (1 mL) at 25 °C for 12 h under irradiation with white light. <sup>b</sup>Isolated yield after chromatography. PFNB = pentafluoronitrobenzene.

**Table S3.** Optimization of the loading of **1a**.<sup>a</sup>

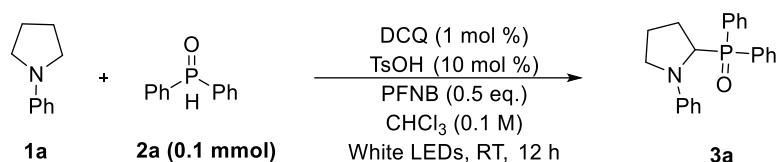

| Entry | 1a                 | Yield (%) <sup>b</sup> |
|-------|--------------------|------------------------|
| 1     | 0.12mmol (1.2 eq.) | 41                     |
| 2     | 0.13mmol (1.3 eq.) | 89                     |
| 3     | 0.14mmol (1.4 eq.) | 84                     |
| 4     | 0.15mmol (1.5 eq.) | 85                     |
| 5     | 0.20mmol (2.0 eq.) | 82                     |

<sup>a</sup>Reaction conditions: **1a** (0.1 mmol), PFNB (0.5 eq.), TsOH (10 mol %) and DCQ (1 mol %) in CHCl<sub>3</sub> (1 mL) at 25 °C for 12 h under irradiation with white light. <sup>b</sup>Isolated yield after chromatography. PFNB = pentafluoronitrobenzene.

**Table S4.** Optimization of the loading of PFNB.<sup>a</sup>

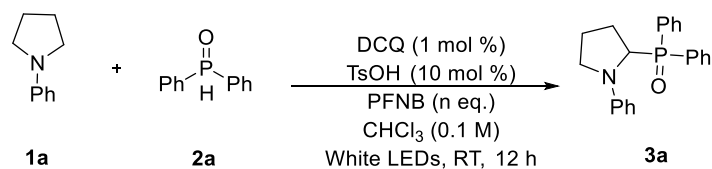

| Entry | PFNB     | Yield (%) <sup>b</sup> |
|-------|----------|------------------------|
| 1     | 0.55 eq. | 83                     |
| 2     | 0.60 eq. | 58                     |



column chromatography (PE/EA = 3:1 to PE/*i*PrOH = 10:1) to give the corresponding product.

**Diphenyl (1-phenylpyrrolidin-2-yl)phosphine oxide (3a)**

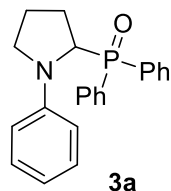

Following the general procedure, compound **3a** was obtained as a white solid in 99% yield; mp = 188-190 °C;  $R_f$  = 0.51 (PE:*i*PrOH = 5:1);

**$^1\text{H}$  NMR (400 MHz,  $\text{CDCl}_3$ ):**  $\delta$  7.93-7.89 (m, 2H), 7.78-7.74 (m, 2H), 7.58-7.54 (m, 1H), 7.51-7.45 (m, 2H), 7.45-7.41 (m, 1H), 7.35-7.31 (m, 2H), 6.96-6.92 (m, 2H), 6.57-6.93 (t,  $J$  = 7.28 Hz, 1H), 6.36-6.35 (d,  $J$  = 8.06 Hz, 2H), 4.69-4.65 (m, 1H);

**$^{13}\text{C}$  NMR (101 MHz,  $\text{CDCl}_3$ ):**  $\delta$  147.8, 131.91 (d,  $J_{\text{C-P}}$  = 2.7 Hz), 131.90 (d,  $J_{\text{C-P}}$  = 8.7 Hz), 131.81 (d,  $J_{\text{C-P}}$  = 89.3 Hz), 131.80 (d,  $J_{\text{C-P}}$  = 2.7 Hz), 131.7 (d,  $J_{\text{C-P}}$  = 8.4 Hz), 131.6 (d,  $J_{\text{C-P}}$  = 92.5 Hz), 128.6 (d,  $J_{\text{C-P}}$  = 10.8 Hz), 128.5, 128.2 (d,  $J_{\text{C-P}}$  = 11.0 Hz), 116.8, 113.2, 60.5 (d,  $J_{\text{C-P}}$  = 86.7 Hz), 50.9, 27.7, 24.2;

**$^{31}\text{P}$  NMR (162 MHz,  $\text{CDCl}_3$ ):**  $\delta$  27.3.

**HRMS (ESI)** for  $\text{C}_{22}\text{H}_{23}\text{NOP}$  [ $\text{M}+\text{H}$ ] $^+$  calcd.348.1512, found: 348.1512.

**(1-(2-Fluorophenyl)pyrrolidin-2-yl)diphenylphosphine oxide (3b)**

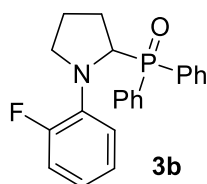

Following the general procedure, compound **3b** was obtained as a white solid in 78% yield; mp = 142-144 °C;  $R_f$  = 0.53 (PE:*i*PrOH = 5:1);

**$^1\text{H}$  NMR (400 MHz,  $\text{CDCl}_3$ ):**  $\delta$  7.91-7.73 (m, 1H), 7.45-7.30 (m, 1H), 7.29-7.19 (m, 1H), 6.79-6.49 (m, 1H), 4.94 (td,  $J$  = 9.1, 4.6 Hz, 1H), 3.81 (dt,  $J$  = 7.8, 6.4 Hz, 1H), 3.15 (dd,  $J$  = 15.1, 7.5 Hz, 1H), 2.45-2.21 (m, 1H), 2.09-1.93 (m, 1H), 1.93-1.72 (m, 1H);

**<sup>13</sup>C NMR (101 MHz, CDCl<sub>3</sub>):**  $\delta$  154.1 (d,  $J_{C-F}$  = 243.4 Hz), 136.2 (d,  $J_{C-F}$  = 9.1 Hz), 132.1 (d,  $J_{C-P}$  = 90.9 Hz), 131.7 (d,  $J_{C-P}$  = 8.1 Hz), 131.4 (d,  $J_{C-P}$  = 2.0 Hz), 131.3 (d,  $J_{C-P}$  = 2.0 Hz), 131.1 (d,  $J_{C-P}$  = 8.1 Hz), 130.9 (d,  $J_{C-P}$  = 92.9 Hz), 128.2 (d,  $J_{C-P}$  = 11.1 Hz), 127.7 (d,  $J_{C-P}$  = 11.1 Hz), 123.7 (d,  $J_{C-F}$  = 3.0 Hz), 120.4 (t,  $J_{C-F}$  = 8.1 Hz), 119.5 (t,  $J_{C-F}$  = 4.0 Hz), 115.5 (t,  $J_{C-F}$  = 21.2 Hz), 58.8 (dd,  $J_{C-P}$  = 82.8 Hz,  $J_{C-F}$  = 5.0 Hz), 53.1 (t,  $J_{C-P}$  = 2.0 Hz), 27.2, 24.0;

**<sup>31</sup>P NMR (162 MHz, CDCl<sub>3</sub>):**  $\delta$  29.0;

**<sup>19</sup>F NMR (376 MHz, CDCl<sub>3</sub>):**  $\delta$  -121.6.

**HRMS (ESI)** for C<sub>22</sub>H<sub>22</sub>FNOP [M+H]<sup>+</sup> calcd. 382.1418, found: 382.1418.

**(1-(2-Chlorophenyl)pyrrolidin-2-yl)diphenylphosphine oxide (3c)**

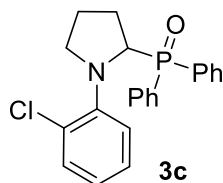

Following the general procedure, compound **3c** was obtained as a white solid in 73% yield; mp = 136-138 °C; R<sub>f</sub> = 0.48 (PE:*i*PrOH = 5:1);

**<sup>1</sup>H NMR (400 MHz, CDCl<sub>3</sub>):**  $\delta$  8.15-7.97 (m, 2H), 7.79-7.58 (m, 2H), 7.49-7.39 (m, 1H), 7.39-7.33 (m, 2H), 7.33-7.25 (m, 1H), 7.26-7.17 (m, 2H), 7.12 - 7.00 (m, 1H), 6.99-6.83 (m, 2H), 6.82-6.66 (m, 1H), 4.99-4.70 (m, 1H), 3.89-3.61 (m, 1H), 3.15-2.82 (m, 1H), 2.70-2.36 (m, 1H), 2.36-2.04 (m, 1H), 1.91-1.69 (m, 2H);

**<sup>13</sup>C NMR (101 MHz, CDCl<sub>3</sub>):**  $\delta$  146.8, 132.3 (d,  $J_{C-P}$  = 91.9 Hz), 132.0 (d,  $J_{C-P}$  = 8.2 Hz), 131.4 (d,  $J_{C-P}$  = 2.7 Hz), 131.2 (d,  $J_{C-P}$  = 2.7 Hz), 131.0 (d,  $J_{C-P}$  = 9.1 Hz), 130.09 (d,  $J_{C-P}$  = 93.9 Hz), 130.10, 129.0, 127.95 (d,  $J_{C-P}$  = 11.1 Hz), 127.88 (d,  $J_{C-P}$  = 11.1 Hz), 126.8, 123.4, 122.4, 59.4 (d,  $J_{C-P}$  = 89.0 Hz), 55.4 (d,  $J_{C-P}$  = 4.1 Hz), 27.3, 24.8 (d,  $J_{C-P}$  = 3.0 Hz);

**<sup>31</sup>P NMR (162 MHz, CDCl<sub>3</sub>):**  $\delta$  29.0.

**HRMS (ESI)** for C<sub>22</sub>H<sub>22</sub>ClNOP [M+H]<sup>+</sup> calcd. 382.1122, found: 382.1122.

**(1-(2-Bromophenyl)pyrrolidin-2-yl)diphenylphosphine oxide (3d)**

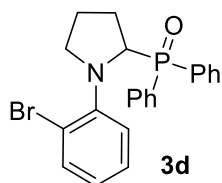

Following the general procedure, compound **3d** was obtained as a colorless oil in 64% yield; mp = 104-106 °C;  $R_f$  = 0.47 (PE:*i*PrOH = 5:1);

**$^1\text{H}$  NMR (400 MHz,  $\text{CDCl}_3$ ):**  $\delta$  8.17-8.00 (m, 1H), 7.75-7.59 (m, 1H), 7.53-7.42 (m, 1H), 7.42-7.35 (m, 1H), 7.34-7.26 (m, 1H), 7.26-7.14 (m, 1H), 7.03-6.93 (m, 1H), 6.76-6.51 (m, 1H), 4.90-4.70 (m, 1H), 3.87-3.57 (m, 1H), 3.14-2.74 (m, 1H), 2.74-2.38 (m, 1H), 2.37-2.12 (m, 1H), 1.93-1.63 (m, 1H).

**$^{13}\text{C}$  NMR (101 MHz,  $\text{CDCl}_3$ ):**  $\delta$  148.6 (d,  $J_{\text{C-P}}$  = 2.2 Hz), 133.4, 132.3 (d,  $J_{\text{C-P}}$  = 8.3 Hz), 132.2 (d,  $J_{\text{C-P}}$  = 92.9 Hz), 131.5 (d,  $J_{\text{C-P}}$  = 2.7 Hz), 131.3 (d,  $J_{\text{C-P}}$  = 2.7 Hz), 131.2 (d,  $J_{\text{C-P}}$  = 8.9 Hz), 129.9 (d,  $J_{\text{C-P}}$  = 94.9 Hz), 128.0 (d,  $J_{\text{C-P}}$  = 11.1 Hz), 127.6, 124.2, 123.0, 120.2, 60.0 (d,  $J_{\text{C-P}}$  = 90.0 Hz), 56.1 (d,  $J_{\text{C-P}}$  = 4.5 Hz), 27.4, 24.9 (d,  $J_{\text{C-P}}$  = 3.1 Hz);

**$^{31}\text{P}$  NMR (162 MHz,  $\text{CDCl}_3$ ):**  $\delta$  29.5.

**HRMS (ESI)** for  $\text{C}_{22}\text{H}_{22}\text{BrNOP}$   $[\text{M}+\text{H}]^+$  calcd. 426.0617, found: 426.0618.

### (1-(2-Methoxyphenyl)pyrrolidin-2-yl)diphenylphosphine oxide (**3e**)

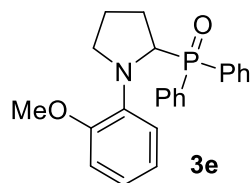

Following the general procedure, compound **3e** was obtained as a yellow oil in 82% yield;  $R_f$  = 0.47 (PE:*i*PrOH = 5:1);

**$^1\text{H}$  NMR (600 MHz,  $\text{CDCl}_3$ ):**  $\delta$  7.79-7.72 (m, 1H), 7.72-7.66 (m, 1H), 7.41-7.33 (m, 1H), 7.33-7.28 (m, 1H), 7.25-7.17 (m, 1H), 6.87-6.79 (m, 1H), 6.75-6.66 (m, 1H), 6.66-6.59 (m, 1H), 6.45-6.28 (m, 1H), 5.12-4.98 (m, 1H), 3.84-3.70 (m, 1H), 3.66 (s, 1H), 3.16-2.98 (m, 1H), 2.47-2.33 (m, 1H), 2.33-2.19 (m, 1H), 1.92-1.72 (m, 1H);

**$^{13}\text{C}$  NMR (151 MHz,  $\text{CDCl}_3$ ):**  $\delta$  152.4, 137.5, 133.4 (d,  $J_{\text{C-P}}$  = 88.6 Hz), 131.9 (d,  $J_{\text{C-P}}$  = 8.7 Hz), 131.2 (d,  $J_{\text{C-P}}$  = 1.6 Hz), 131.0 (d,  $J_{\text{C-P}}$  = 8.6 Hz), 130.9 (d,  $J_{\text{C-P}}$  = 2.9 Hz),

128.2 (d,  $J_{C-P} = 10.8$  Hz), 127.5 (d,  $J_{C-P} = 11.0$  Hz), 122.5, 121.5, 120.5, 110.6, 58.5 (d,  $J_{C-P} = 81.4$  Hz), 54.9, 53.5, 27.3, 24.1.

**$^{31}\text{P}$  NMR (243 MHz,  $\text{CDCl}_3$ ):**  $\delta$  30.2.

**HRMS (ESI)** for  $\text{C}_{23}\text{H}_{25}\text{NO}_2\text{P}$   $[\text{M}+\text{H}]^+$  calcd. 378.1617, found: 378.1616.

**(1-(4-Fluorophenyl)pyrrolidin-2-yl)diphenylphosphine oxide (3f)**

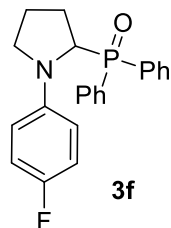

Following the general procedure, compound **3f** was obtained as a white solid in 96% yield; mp = 208-210 °C;  $R_f = 0.47$  (PE:*i*PrOH = 5:1);

**$^1\text{H}$  NMR (400 MHz,  $\text{CDCl}_3$ ):**  $\delta$  7.97-7.80 (m, 1H), 7.81-7.68 (m, 1H), 7.62-7.50 (m, 1H), 7.50-7.37 (m, 2H), 7.38-7.22 (m, 1H), 6.70-6.56 (m, 1H), 6.41-6.21 (m, 1H), 4.60 (t,  $J = 9.0$  Hz, 1H), 3.61 (td,  $J = 8.4, 1.7$  Hz, 1H), 3.14 (td,  $J = 9.7, 2.8$  Hz, 1H), 2.51-2.29 (m, 1H), 2.27-2.04 (m, 1H), 2.04-1.78 (m, 1H);

**$^{13}\text{C}$  NMR (101 MHz,  $\text{CDCl}_3$ ):**  $\delta$  155.1 (d,  $J_{C-F} = 236.3$  Hz), 144.3 (d,  $J_{C-F} = 1.0$  Hz), 131.9 (d,  $J_{C-P} = 2.0$  Hz), 131.7 (d,  $J_{C-P} = 2.0$  Hz), 131.68 (d,  $J_{C-P} = 8.0$  Hz), 131.6 (d,  $J_{C-P} = 8.1$  Hz), 131.5 (d,  $J_{C-P} = 92.9$  Hz), 131.4 (d,  $J_{C-P} = 89.9$  Hz), 128.5 (d,  $J_{C-P} = 11.1$  Hz), 128.2 (d,  $J_{C-P} = 11.1$  Hz), 114.7 (d,  $J_{C-F} = 22.2$  Hz), 113.8 (t,  $J_{C-F} = 7.1$  Hz), 59.6 (d,  $J_{C-P} = 87.9$  Hz), 51.3, 27.7, 24.2;

**$^{31}\text{P}$  NMR (162 MHz,  $\text{CDCl}_3$ ):**  $\delta$  27.5;

**$^{19}\text{F}$  NMR (376 MHz,  $\text{CDCl}_3$ ):**  $\delta$  -128.8.

**HRMS (ESI)** for  $\text{C}_{22}\text{H}_{22}\text{FNOP}$   $[\text{M}+\text{H}]^+$  calcd. 366.1418, found: 366.1415.

**(1-(4-Chlorophenyl)pyrrolidin-2-yl)diphenylphosphine oxide (3g)**

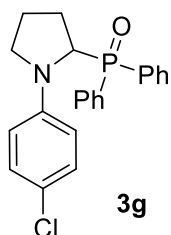

Following the general procedure, compound **3c** was obtained as a white solid in 96% yield; mp = 200-202 °C;  $R_f$  = 0.48 (PE:iPrOH = 5:1);

**$^1\text{H}$  NMR (400 MHz,  $\text{CDCl}_3$ ):**  $\delta$  7.97-7.84 (m, 1H), 7.81-7.67 (m, 1H), 7.66-7.54 (m, 1H), 7.55-7.47 (m, 1H), 7.46-7.40 (m, 1H), 7.39-7.28 (m, 1H), 7.00-6.65 (m, 1H), 6.25 (d,  $J$  = 9.0 Hz, 1H), 4.61 (t,  $J$  = 8.7 Hz, 1H), 3.67-3.53 (m, 1H), 3.23-3.11 (m, 1H), 2.53-2.35 (m, 1H), 2.34-2.06 (m, 1H), 2.04-1.82 (m, 1H);

**$^{13}\text{C}$  NMR (101 MHz,  $\text{CDCl}_3$ ):**  $\delta$  146.3, 132.0 (d,  $J_{\text{C-P}}$  = 2.6 Hz), 131.9 (d,  $J_{\text{C-P}}$  = 2.7 Hz), 131.7 (d,  $J_{\text{C-P}}$  = 12.8 Hz), 131.6 (d,  $J_{\text{C-P}}$  = 12.3 Hz), 131.3 (d,  $J_{\text{C-P}}$  = 91.9 Hz), 128.7 (d,  $J_{\text{C-P}}$  = 10.9 Hz), 128.3 (d,  $J_{\text{C-P}}$  = 11.0 Hz), 128.1, 121.4, 114.1, 60.5 (d,  $J_{\text{C-P}}$  = 86.0 Hz), 50.8, 27.3 (d,  $J_{\text{C-P}}$  = 97.1 Hz), 24.1;

**$^{31}\text{P}$  NMR (162 MHz,  $\text{CDCl}_3$ ):**  $\delta$  27.6.

**HRMS (ESI)** for  $\text{C}_{22}\text{H}_{22}\text{ClNOP}$  [ $\text{M}+\text{H}$ ] $^+$  calcd. 382.1122, found: 382.1122.

### Diphenyl(1-(4-(trifluoromethyl)phenyl)pyrrolidin-2-yl)phosphine oxide (**3h**)

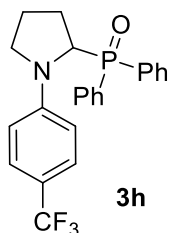

Following the general procedure, compound **3h** was obtained as a white solid in 66% yield; mp = 224-226 °C;  $R_f$  = 0.44 (PE:iPrOH = 5:1);

**$^1\text{H}$  NMR (600 MHz,  $\text{CDCl}_3$ ):**  $\delta$  7.97-7.83 (m, 1H), 7.74-7.65 (m, 1H), 7.64-7.54 (m, 1H), 7.56-7.49 (m, 1H), 7.45-7.37 (m, 1H), 7.35-7.28 (m, 1H), 7.11 (d,  $J$  = 18.4 Hz, 1H), 6.34 (d,  $J$  = 8.7 Hz, 1H), 4.72 (t,  $J$  = 9.0 Hz, 1H), 3.69-3.60 (m, 1H), 3.31-3.17 (m, 1H), 2.52-2.35 (m, 1H), 2.29-2.05 (m, 1H), 2.01-1.83 (m, 1H);



**<sup>13</sup>C NMR (151 MHz, CDCl<sub>3</sub>):**  $\delta$  149.7, 132.2 (d,  $J_{C-P}$  = 2.1 Hz), 132.1 (d,  $J_{C-P}$  = 2.7 Hz), 131.7 (d,  $J_{C-P}$  = 9.1 Hz), 131.6 (d,  $J_{C-P}$  = 9.1 Hz), 131.4 (d,  $J_{C-P}$  = 92.1 Hz), 131.2 (d,  $J_{C-P}$  = 89.1 Hz), 128.8 (d,  $J_{C-P}$  = 10.9 Hz), 128.4 (d,  $J_{C-P}$  = 11.0 Hz), 125.7 (q,  $J_{C-F}$  = 3.4 Hz), 124.8 (d,  $J_{C-F}$  = 270.3 Hz), 112.4, 60.1 (d,  $J_{C-P}$  = 83.9 Hz), 50.3, 27.9, 24.0;

**<sup>31</sup>P NMR (243 MHz, CDCl<sub>3</sub>):**  $\delta$  27.9;

**<sup>19</sup>F NMR (565 MHz, CDCl<sub>3</sub>):**  $\delta$  -61.1.

**HRMS (ESI):** for C<sub>23</sub>H<sub>22</sub>F<sub>3</sub>NOP [M+H]<sup>+</sup> calcd.416.1386, found: 416.1385.

#### 4-(2-(Diphenylphosphoryl)pyrrolidin-1-yl)benzonitrile (**3i**)

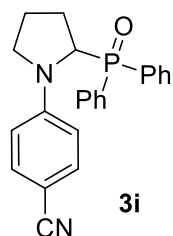

Following the general procedure, compound **3i** was obtained as a white solid in 61% yield; mp = 260-262 °C; R<sub>f</sub> = 0.22 (PE:iPrOH = 5:1);

**<sup>1</sup>H NMR (400 MHz, CDCl<sub>3</sub>):**  $\delta$  7.95-7.85 (m, 1H), 7.73-7.59 (m, 2H), 7.59-7.51 (m, 1H), 7.47-7.38 (m, 1H), 7.36-7.28 (m, 1H), 7.14 (d,  $J$  = 8.9 Hz, 1H), 6.29 (d,  $J$  = 8.9 Hz, 1H), 4.72 (t,  $J$  = 8.8 Hz, 1H), 3.76-3.54 (m, 1H), 3.41-3.10 (m, 1H), 2.51-2.37 (m, 1H), 2.34-2.08 (m, 1H), 2.03-1.93 (m, 1H);

**<sup>13</sup>C NMR (101 MHz, CDCl<sub>3</sub>):**  $\delta$  150.0, 132.7, 132.4 (d,  $J_{C-P}$  = 2.7 Hz), 132.2 (d,  $J_{C-P}$  = 2.8 Hz), 131.6 (d,  $J_{C-P}$  = 3.3 Hz), 131.5 (d,  $J_{C-P}$  = 2.4 Hz), 131.3 (d,  $J_{C-P}$  = 93.7 Hz), 130.7 (d,  $J_{C-P}$  = 90.4 Hz), 128.9 (d,  $J_{C-P}$  = 11.0 Hz), 128.5 (d,  $J_{C-P}$  = 11.2 Hz), 120.4, 112.7, 98.1, 59.7 (d,  $J_{C-P}$  = 82.1 Hz), 50.0, 27.8, 23.8;

**<sup>31</sup>P NMR (162 MHz, CDCl<sub>3</sub>):**  $\delta$  28.0.

**HRMS (ESI)** for C<sub>23</sub>H<sub>22</sub>N<sub>2</sub>OP [M+H]<sup>+</sup> calcd.373.1464, found: 373.1464.

#### Diphenyl(1-(p-tolyl)pyrrolidin-2-yl)phosphine oxide (**3j**)

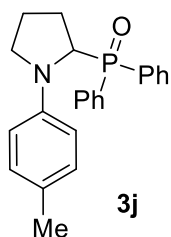

Following the general procedure, compound **3j** was obtained as a white solid in 82% yield; mp = 78-80 °C;  $R_f$  = 0.46 (PE:*i*PrOH = 5:1);

**$^1\text{H}$  NMR (400 MHz,  $\text{CDCl}_3$ ):**  $\delta$  8.00-7.84 (m, 1H), 7.84-7.72 (m, 1H), 7.59-7.48 (m, 1H), 7.46-7.37 (m, 1H), 7.35-7.24 (m, 1H), 6.75 (d,  $J$  = 8.3 Hz, 1H), 6.27 (d,  $J$  = 8.4 Hz, 1H), 4.62 (t,  $J$  = 8.7 Hz, 1H), 3.73-3.43 (m, 1H), 3.30-2.75 (m, 1H), 2.55-2.36 (m, 1H), 2.23-1.97 (m, 2H), 1.94-1.73 (m, 1H);

**$^{13}\text{C}$  NMR (101 MHz,  $\text{CDCl}_3$ ):**  $\delta$  145.7, 131.82 (d,  $J_{\text{C-P}}$  = 8.7 Hz), 131.79 (d,  $J_{\text{C-P}}$  = 89.3 Hz), 131.6 (d,  $J_{\text{C-P}}$  = 7.7 Hz), 131.5 (d,  $J_{\text{C-P}}$  = 8.1 Hz), 131.4 (d,  $J_{\text{C-P}}$  = 92.9 Hz), 128.8, 128.4 (d,  $J_{\text{C-P}}$  = 11.1 Hz), 128.1 (d,  $J_{\text{C-P}}$  = 10.1 Hz), 125.8, 113.1, 60.7 (d,  $J_{\text{C-P}}$  = 87.7 Hz), 51.1, 27.5, 26.7, 24.1, 20.0;

**$^{31}\text{P}$  NMR (162 MHz,  $\text{CDCl}_3$ ):**  $\delta$  27.30.

**HRMS (ESI)** for  $\text{C}_{23}\text{H}_{25}\text{NOP}$   $[\text{M}+\text{H}]^+$  calcd. 362.1668, found: 362.1666.

**(1-(4-Methoxyphenyl)pyrrolidin-2-yl)diphenylphosphine oxide (3k)**

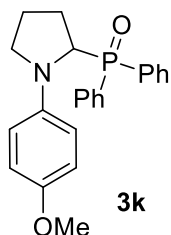

Following the general procedure, compound **3k** was obtained as a white solid in 49% yield; mp = 160-162 °C;  $R_f$  = 0.76 (PE:*i*PrOH = 5:1);

**$^1\text{H}$  NMR (400 MHz,  $\text{CDCl}_3$ ):**  $\delta$  7.95-7.84 (m, 1H), 7.84-7.73 (m, 1H), 7.57-7.48 (m, 1H), 7.49-7.40 (m, 1H), 7.34 (M, 1H), 6.55 (d,  $J$  = 9.0 Hz, 1H), 6.34 (d,  $J$  = 8.9 Hz, 1H), 4.59 (t,  $J$  = 8.5 Hz, 1H), 3.67 (s, 1H), 3.64-3.51 (m, 1H), 3.22-3.04 (m, 1H), 2.51-2.34 (m, 1H), 2.15 (m, 1H), 1.95-1.76 (m, 1H);

**<sup>13</sup>C NMR (101 MHz, CDCl<sub>3</sub>):**  $\delta$  151.5, 142.7, 132.0 (d,  $J_{C-P}$  = 89.5 Hz), 131.9 (d,  $J_{C-P}$  = 8.5 Hz), 131. (d,  $J_{C-P}$  = 2.7 Hz), 131.74, 131.7 (d,  $J_{C-P}$  = 8.2 Hz), 131.6 (d,  $J_{C-P}$  = 92.2 Hz), 128.5 (d,  $J_{C-P}$  = 10.8 Hz), 128.2 (d,  $J_{C-P}$  = 10.9 Hz), 114.6, 114.1, 61.1 (d,  $J_{C-P}$  = 88.5 Hz), 55.7, 51.9, 27.7, 24.4;

**<sup>31</sup>P NMR (162 MHz, CDCl<sub>3</sub>):**  $\delta$  27.2.

**HRMS (ESI)** for C<sub>23</sub>H<sub>25</sub>NO<sub>2</sub>P [M+H]<sup>+</sup> calcd. 378.1617, found: 378.1616.

#### 4-(2-(Diphenylphosphoryl)pyrrolidin-1-yl)-N-methylbenzamide (3l)

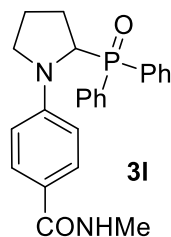

Following the general procedure, compound **3l** was obtained as a white solid in 47% yield; mp = 236-238 °C; R<sub>f</sub> = 0.27 (PE:*i*PrOH = 5:1);

**<sup>1</sup>H NMR (600 MHz, CDCl<sub>3</sub>)**  $\delta$  7.95-7.81 (m, 1H), 7.76-7.66 (m, 1H), 7.63-7.53 (m, 1H), 7.53-7.46 (m, 1H), 7.46-7.38 (m, 1H), 7.33-7.22 (m, 1H), 6.40 (s, 1H), 6.27 (d,  $J$  = 8.7 Hz, 1H), 4.72 (t,  $J$  = 8.9 Hz, 1H), 3.61 (t,  $J$  = 8.0 Hz, 1H), 3.32-3.17 (m, 1H), 2.92 (t,  $J$  = 12.0 Hz, 1H), 2.50-2.37 (m, 1H), 2.24-1.99 (m, 1H), 1.92 (d,  $J$  = 4.8 Hz, 1H);

**<sup>13</sup>C NMR (151 MHz, CDCl<sub>3</sub>)**  $\delta$  167.9, 149.8, 132.2 (d,  $J_{C-P}$  = 2.0 Hz), 132.1 (d,  $J_{C-P}$  = 2.3 Hz), 131.7 (d,  $J_{C-P}$  = 14.9 Hz), 131.6 (d,  $J_{C-P}$  = 14.2 Hz), 131.34 (d,  $J_{C-P}$  = 86.1 Hz), 131.29 (d,  $J_{C-P}$  = 87.6 Hz), 128.8 (d,  $J_{C-P}$  = 10.9 Hz), 128.4 (d,  $J_{C-P}$  = 11.0 Hz), 127.8, 122.2, 112.3, 60.1 (d,  $J_{C-P}$  = 84.6 Hz), 50.4, 27.9, 26.6, 24.0;

**<sup>31</sup>P NMR (243 MHz, CDCl<sub>3</sub>)**  $\delta$  27.98.

**HRMS (ESI)** for C<sub>24</sub>H<sub>26</sub>N<sub>2</sub>O<sub>2</sub>P [M+H]<sup>+</sup> calcd. 405.1726, found: 405.1728.

#### Methyl 4-(2-(diphenylphosphoryl)pyrrolidin-1-yl)benzoate (3m)

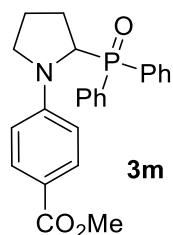

Following the general procedure, compound **3m** was obtained as a white solid in 52% yield; mp = 254-256 °C;  $R_f$  = 0.33 (PE:*i*PrOH = 5:1);

**$^1\text{H}$  NMR (400 MHz,  $\text{CDCl}_3$ ):**  $\delta$  8.01-7.82 (m, 1H), 7.83-7.71 (m, 1H), 7.71-7.63 (m, 1H), 7.58 (d,  $J$  = 8.9 Hz, 1H), 7.56-7.49 (m, 1H), 7.45-7.32 (m, 1H), 7.32-7.28 (m, 1H), 6.26 (d,  $J$  = 8.9 Hz, 1H), 4.74 (t,  $J$  = 8.7 Hz, 1H), 3.81 (s, 1H), 3.67 (t,  $J$  = 8.0 Hz, 1H), 3.39-3.19 (m, 1H), 2.55-2.33 (m, 1H), 2.33-2.05 (m, 1H), 2.05-1.81 (m, 1H);

**$^{13}\text{C}$  NMR (151 MHz,  $\text{CDCl}_3$ ):**  $\delta$  167.2, 150.8, 132.3 (d,  $J_{\text{C-P}}$  = 2.1 Hz), 132.1 (d,  $J_{\text{C-P}}$  = 2.6 Hz), 131.7 (d,  $J_{\text{C-P}}$  = 18.5 Hz), 131.6 (d,  $J_{\text{C-P}}$  = 17.7 Hz), 131.2 (d,  $J_{\text{C-P}}$  = 93.6 Hz), 131.1 (d,  $J_{\text{C-P}}$  = 90.6 Hz), 130.5, 128.9 (d,  $J_{\text{C-P}}$  = 10.9 Hz), 128.4 (d,  $J_{\text{C-P}}$  = 11.0 Hz), 117.7, 112.0, 60.0 (d,  $J_{\text{C-P}}$  = 83.3 Hz), 51.4, 50.2, 27.8, 23.9;

**$^{31}\text{P}$  NMR (162 MHz,  $\text{CDCl}_3$ ):**  $\delta$  28.0.

**HRMS (ESI)** for  $\text{C}_{24}\text{H}_{25}\text{NO}_3\text{P}$  [ $\text{M}+\text{H}$ ] $^+$  calcd.406.1567, found: 406.1566.

### (1-(3-(Methylthio)phenyl)pyrrolidin-2-yl)diphenylphosphine oxide (**3n**)

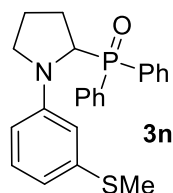

Following the general procedure, compound **3n** was obtained as a white solid in 82% yield; mp = 170-172 °C;  $R_f$  = 0.52 (PE:*i*PrOH = 5:1);

**$^1\text{H}$  NMR (600 MHz,  $\text{CDCl}_3$ ):**  $\delta$  7.95-7.84 (m, 1H), 7.81-7.71 (m, 1H), 7.59-7.52 (m, 1H), 7.51-7.45 (m, 1H), 7.45-7.39 (m, 1H), 7.38-7.29 (m, 1H), 6.85 (t,  $J$  = 8.0 Hz, 1H), 6.46 (d,  $J$  = 8.1 Hz, 1H), 6.24 (s, 1H), 6.16 (dd,  $J$  = 8.3, 2.2 Hz, 1H), 4.66 (t,  $J$  = 8.9 Hz, 1H), 3.66-3.54 (m, 1H), 3.33-3.11 (m, 1H), 2.53-2.38 (m, 1H), 2.29 (s, 1H), 2.21-2.05 (m, 1H), 2.05-1.94 (m, 1H), 1.93-1.76 (m, 1H);

**<sup>13</sup>C NMR (151 MHz, CDCl<sub>3</sub>):**  $\delta$  147.9, 138.4, 131.8 (d,  $J_{C-P}$  = 20.7 Hz), 131.7 (d,  $J_{C-P}$  = 8.7 Hz), 131.6 (d,  $J_{C-P}$  = 86.1 Hz), 131.5 (d,  $J_{C-P}$  = 8.5 Hz), 131.4 (d,  $J_{C-P}$  = 93.6 Hz), 128.7, 128.6 (d,  $J_{C-P}$  = 10.7 Hz), 128.2 (d,  $J_{C-P}$  = 10.9 Hz), 115.1, 111.5, 110.4, 60.4 (d,  $J_{C-P}$  = 85.9 Hz), 50.7, 27.6, 24.0, 15.7;

**<sup>31</sup>P NMR (162 MHz, CDCl<sub>3</sub>):**  $\delta$  27.1.

**HRMS (ESI)** for C<sub>23</sub>H<sub>25</sub>NOPS [M+H]<sup>+</sup> calcd. 394.1389, found: 394.1390.

**(1-(3-Fluorophenyl)pyrrolidin-2-yl)diphenylphosphine oxide (3o)**

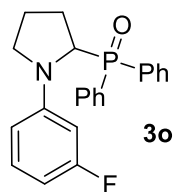

Following the general procedure, compound **3o** was obtained as a white solid in 75% yield; mp = 180-182 °C; R<sub>f</sub> = 0.58 (PE:*i*PrOH = 5:1);

**<sup>1</sup>H NMR (400 MHz, CDCl<sub>3</sub>):**  $\delta$  8.01-7.85 (m, 1H), 7.79-7.69 (m, 1H), 7.63-7.55 (m, 1H), 7.55-7.46 (m, 1H), 7.46-7.39 (m, 1H), 7.37-7.29 (m, 1H), 6.90-6.75 (m, 1H), 6.39-6.16 (m, 1H), 6.08 (d,  $J$  = 8.3 Hz, 1H), 5.98 (d,  $J$  = 12.6 Hz, 1H), 4.75-4.49 (m, 1H), 3.76-3.50 (m, 1H), 3.29-3.02 (m, 1H), 2.57-2.31 (m, 1H), 2.30-1.99 (m, 1H), 1.99-1.76 (m, 1H);

**<sup>13</sup>C NMR (101 MHz, CDCl<sub>3</sub>):**  $\delta$  163.3 (d,  $J_{C-F}$  = 243.4 Hz), 149.3 (d,  $J_{C-F}$  = 11.1 Hz), 132.1 (d,  $J_{C-P}$  = 3.0 Hz), 131.9 (dd,  $J_{C-P}$  = 3.0 Hz), 131.7 (d,  $J_{C-P}$  = 8.1 Hz), 131.6 (d,  $J_{C-P}$  = 8.1 Hz), 131.38 (d,  $J_{C-P}$  = 93.9 Hz), 131.37 (d,  $J_{C-P}$  = 90.9 Hz), 129.4 (d,  $J_{C-F}$  = 10.1 Hz), 128.7 (d,  $J_{C-P}$  = 11.1 Hz), 128.3 (d,  $J_{C-P}$  = 11.1 Hz), 108.8 (d,  $J_{C-F}$  = 2.0 Hz), 103.2 (d,  $J_{C-F}$  = 21.2 Hz), 100.1 (t,  $J_{C-F}$  = 21.2 Hz), 60.4 (d,  $J_{C-P}$  = 85.8 Hz), 50.7, 27.7, 24.0;

**<sup>31</sup>P NMR (162 MHz, CDCl<sub>3</sub>):**  $\delta$  27.5;

**<sup>19</sup>F NMR (376 MHz, CDCl<sub>3</sub>):**  $\delta$  -113.3.

**HRMS (ESI)** for C<sub>22</sub>H<sub>22</sub>FNOP [M+H]<sup>+</sup> calcd. 366.1418, found: 366.1418.

**(1-Mesitylpyrrolidin-2-yl)diphenylphosphine oxide (3p)**

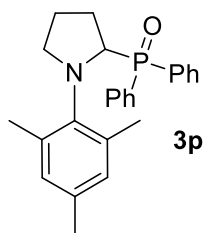

Following the general procedure, compound **3p** was obtained as a yellow oil in 54% yield;  $R_f = 0.70$  (PE:*i*PrOH = 5:1);

**$^1\text{H}$  NMR (400 MHz,  $\text{CDCl}_3$ ):**  $\delta$  7.71-7.62 (m, 1H), 7.61-7.49 (m, 1H), 7.45-7.36 (m, 1H), 7.36-7.24 (m, 2H), 7.16-7.04 (m, 1H), 6.74 (s, 1H), 6.39 (s, 1H), 4.64-4.50 (m, 1H), 3.48-3.33 (m, 1H), 3.14-2.89 (m, 1H), 2.44-2.32 (m, 1H), 2.31-2.17 (m, 2H), 2.15 (s, 1H), 2.01-1.87 (m, 1H);

**$^{13}\text{C}$  NMR (101 MHz,  $\text{CDCl}_3$ ):**  $\delta$  142.5, 139.3, 134.6, 134.0, 133.6 (d,  $J_{C-P} = 86.9$  Hz), 131.4 (d,  $J_{C-P} = 89.9$  Hz), 131.1 (d,  $J_{C-P} = 8.6$  Hz), 131.0, 130.8 (d,  $J_{C-P} = 34.9$  Hz), 130.6 (d,  $J_{C-P} = 8.2$  Hz), 129.6, 128.6, 128.2 (d,  $J_{C-P} = 10.5$  Hz), 127.4 (d,  $J_{C-P} = 11.1$  Hz), 60.5 (d,  $J_{C-P} = 92.1$  Hz), 53.5 (d,  $J_{C-P} = 3.4$  Hz), 27.4, 25.9, 20.5, 18.8, 18.5;

**$^{31}\text{P}$  NMR (162 MHz,  $\text{CDCl}_3$ ):**  $\delta$  28.1.

**HRMS (ESI)** for  $\text{C}_{25}\text{H}_{29}\text{NOP}$   $[\text{M}+\text{H}]^+$  calcd. 390.1981, found: 390.1978.

### (1-(2,6-Diisopropylphenyl)pyrrolidin-2-yl)diphenylphosphine oxide (**3q**)

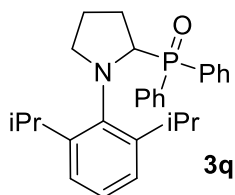

Following the general procedure, compound **3q** was obtained as a white solid in 50% yield; mp = 126-128 °C;  $R_f = 0.63$  (PE:*i*PrOH = 5:1);

**$^1\text{H}$  NMR (400 MHz,  $\text{CDCl}_3$ ):**  $\delta$  7.62-7.51 (m, 1H), 7.48-7.31 (m, 3H), 7.29-7.17 (m, 1H), 7.16-7.05 (m, 2H), 6.86-6.66 (m, 1H), 4.61-4.32 (m, 1H), 3.71-3.39 (m, 1H), 3.22-2.99 (m, 1H), 2.46-2.16 (m, 2H), 2.13-1.86 (m, 1H), 1.47 (d,  $J = 6.8$  Hz, 1H), 1.22 (d,  $J = 6.8$  Hz, 2H), 1.00 (d,  $J = 6.8$  Hz, 1H), 0.34 (d,  $J = 6.8$  Hz, 1H);

**$^{13}\text{C}$  NMR (101 MHz,  $\text{CDCl}_3$ ):**  $\delta$  150.6, 146.4, 143.5, 133.4 (d,  $J_{C-P} = 86.9$  Hz), 132.3 (d,  $J_{C-P} = 91.9$  Hz), 131.1 (d,  $J_{C-P} = 8.8$  Hz), 130.9, 130.5 (d,  $J_{C-P} = 8.2$  Hz), 128.4 (d,

$J_{C-P} = 10.5$  Hz), 127.9 (d,  $J_{C-P} = 11.1$  Hz), 126.6, 124.5, 123.5, 62.3 (d,  $J_{C-P} = 91.4$  Hz), 56.9 (d,  $J_{C-P} = 3.6$  Hz), 28.1 (d,  $J_{C-P} = 9.6$  Hz), 27.1 (d,  $J_{C-P} = 56.3$  Hz), 26.2, 25.8, 23.7, 21.7;

**$^{31}\text{P}$  NMR (162 MHz,  $\text{CDCl}_3$ ):**  $\delta$  28.2.

**HRMS (ESI)** for  $\text{C}_{28}\text{H}_{35}\text{NOP}$   $[\text{M}+\text{H}]^+$  calcd. 432.2451, found: 432.2448.

### (1-(Naphthalen-1-yl)pyrrolidin-2-yl)diphenylphosphine oxide (**3r**)

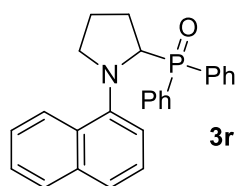

Following the general procedure, compound **3r** was obtained as white solid in 50% yield; mp = 160-162 °C;  $R_f = 0.49$  (PE:*i*PrOH = 5:1);

**$^1\text{H}$  NMR (600 MHz,  $\text{CDCl}_3$ ):**  $\delta$  8.15-8.05 (m, 1H), 7.77-7.65 (m, 5H), 7.45-7.35 (m, 3H), 7.35-7.28 (m, 1H), 7.24-7.14 (m, 4H), 7.12-6.98 (m, 3H), 4.93-4.78 (m, 1H), 3.75-3.57 (m, 1H), 3.13-2.89 (m, 1H), 2.57-2.37 (m, 2H), 2.08-1.95 (m, 1H), 1.95-1.79 (m, 1H);

**$^{13}\text{C}$  NMR (151 MHz,  $\text{CDCl}_3$ ):**  $\delta$  148.3 (d,  $J_{C-P} = 3.4$  Hz), 134.5, 132.7 (d,  $J_{C-P} = 90.6$  Hz), 131.5 (d,  $J_{C-P} = 8.6$  Hz), 131.3, 131.0 (d,  $J_{C-P} = 8.7$  Hz), 130.9 (d,  $J_{C-P} = 96.6$  Hz), 130.2, 128.1 (d,  $J_{C-P} = 11.0$  Hz), 127.7, 127.5 (d,  $J_{C-P} = 11.6$  Hz), 125.6, 125.2, 125.0, 124.3, 123.5, 116.7, 61.1 (d,  $J_{C-P} = 91.0$  Hz), 57.8, 26.9, 25.1;

**$^{31}\text{P}$  NMR (243 MHz,  $\text{CDCl}_3$ ):**  $\delta$  30.1.

**HRMS (ESI)** for  $\text{C}_{26}\text{H}_{25}\text{NOP}$   $[\text{M}+\text{H}]^+$  calcd. 398.1668, found: 398.1665.

### Diphenyl(2-phenyloctahydrocyclopenta[*c*]pyrrol-1-yl)phosphine oxide (**3s**)

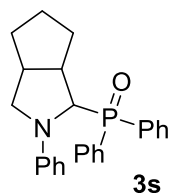

Following the general procedure, compound **3s** was obtained as a white solid in 74% yield; mp=212-214 °C;  $R_f = 0.58$  (PE:*i*PrOH = 5:1); <sup>1</sup>

**<sup>1</sup>H NMR (400 MHz, CDCl<sub>3</sub>):**  $\delta$  7.97-7.83 (m, 1H), 7.72-7.62 (m, 1H), 7.58-7.52 (m, 1H), 7.51-7.43 (m, 1H), 7.40-7.30 (m, 1H), 7.30-7.23 (m, 1H), 6.95-6.82 (m, 1H), 6.48 (t,  $J = 7.2$  Hz, 1H), 6.32 (d,  $J = 8.3$  Hz, 1H), 4.68 (d,  $J = 9.4$  Hz, 1H), 3.84 (t,  $J = 9.1$  Hz, 1H), 3.08-2.98 (m, 1H), 2.98-2.88 (m, 1H), 2.82-2.63 (m, 1H), 2.03-1.92 (m, 1H), 1.88-1.74 (m, 1H), 1.74-1.55 (m, 1H), 1.56-1.41 (m, 1H), 1.41-1.25 (m, 1H);

**<sup>13</sup>C NMR (101 MHz, CDCl<sub>3</sub>):**  $\delta$  147.3, 132.0 (d,  $J_{C-P} = 87.9$  Hz), 131.8 (d,  $J_{C-P} = 90.9$  Hz), 131.76 (d,  $J_{C-P} = 10.1$  Hz), 131.73 (d,  $J_{C-P} = 20.2$  Hz), 131.5 (d,  $J_{C-P} = 8.3$  Hz), 128.7 (d,  $J_{C-P} = 10.7$  Hz), 128.4, 128.1 (d,  $J_{C-P} = 11.0$  Hz), 116.32, 113.1, 66.1 (d,  $J_{C-P} = 81.9$  Hz), 57.0, 45.6 (d,  $J_{C-P} = 2.4$  Hz), 42.0, 33.8 (d,  $J_{C-P} = 11.9$  Hz), 32.6, 25.4;

**<sup>31</sup>P NMR (162 MHz, CDCl<sub>3</sub>):**  $\delta$  27.6.

**HRMS (ESI)** for C<sub>25</sub>H<sub>26</sub>NOP [M+H]<sup>+</sup> calcd. 388.1825, found: 388.1825

### Diphenyl(1-phenylpiperidin-2-yl)phosphine oxide (**3t**)

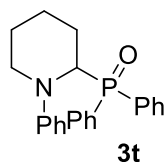

Following the general procedure, compound **3t** was obtained as a white solid in 60% yield; mp = 168-170 °C; R<sub>f</sub> = 0.60 (PE:iPrOH = 5:1);

**<sup>1</sup>H NMR (400 MHz, CDCl<sub>3</sub>):**  $\delta$  8.04-7.81 (m, 1H), 7.78-7.63 (m, 1H), 7.60-7.42 (m, 2H), 7.38-7.28 (m, 1H), 7.28-7.18 (m, 1H), 7.11-7.04 (m, 1H), 6.74-6.52 (m, 1H), 4.78-4.35 (m, 1H), 4.20-3.74 (m, 1H), 3.71-3.42 (m, 1H), 2.50-2.31 (m, 1H), 2.03-1.78 (m, 1H), 1.76-1.52 (m, 2H);

**<sup>13</sup>C NMR (101 MHz, CDCl<sub>3</sub>):**  $\delta$  150.4 (d,  $J_{C-P} = 5.8$  Hz), 132.61 (d,  $J_{C-P} = 86.9$  Hz), 132.5 (d,  $J_{C-P} = 96.0$  Hz), 131.5 (d,  $J_{C-P} = 2.7$  Hz), 131.2 (d,  $J_{C-P} = 2.7$  Hz), 131.0 (d,  $J_{C-P} = 9.2$  Hz), 130.9 (d,  $J_{C-P} = 8.3$  Hz), 128.9, 128.6 (d,  $J_{C-P} = 10.7$  Hz), 128.0 (d,  $J_{C-P} = 11.3$  Hz), 118.0, 115.8, 56.5 (d,  $J_{C-P} = 77.2$  Hz), 45.9, 23.9 (d,  $J_{C-P} = 4.2$  Hz), 23.5 (d,  $J_{C-P} = 1.5$  Hz), 21.0 (d,  $J_{C-P} = 1.7$  Hz).

**<sup>31</sup>P NMR (162 MHz, CDCl<sub>3</sub>):**  $\delta$  33.6.

**HRMS (ESI)** for C<sub>23</sub>H<sub>25</sub>NOP [M+H]<sup>+</sup> calcd. 362.1668, found: 362.1671.



### Diphenyl(1-phenylazepan-2-yl)phosphine oxide (**3u**)

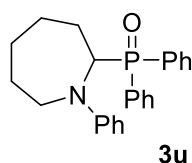

Following the general procedure, compound **3u** was obtained as a white solid in 96% yield; mp = 188-190 °C;  $R_f$  = 0.60 (PE:*i*PrOH = 5:1);

**$^1\text{H}$  NMR (400 MHz,  $\text{CDCl}_3$ ):**  $\delta$  7.26-7.22 (m, 2H), 6.80 (t,  $J$  = 7.3 Hz, 1H), 6.60 (d,  $J$  = 7.8 Hz, 2H), 6.19 (s, 1H), 3.85-3.81 (m, 1H), 3.60 (d,  $J$  = 3.4 Hz, 1H), 2.95 (t,  $J$  = 8.2 Hz, 1H), 2.87-2.78 (m, 1H), 2.74-2.68 (m, 1H), 2.03-1.97 (m, 1H), 1.83-1.72 (m, 2H), 1.66-1.57 (m, 3H), 1.27 (s, 9H);

**$^{13}\text{C}$  NMR (101 MHz,  $\text{CDCl}_3$ )**  $\delta$  147.5 (d,  $J_{\text{C-P}}$  = 2.0 Hz), 131.7 (d,  $J_{\text{C-P}}$  = 2.6 Hz), 131.6 (d,  $J_{\text{C-P}}$  = 85.8 Hz), 131.5 (d,  $J_{\text{C-P}}$  = 2.1 Hz), 131.4 (d,  $J_{\text{C-P}}$  = 2.7 Hz), 131.2 (d,  $J_{\text{C-P}}$  = 9.3 Hz), 131.0 (d,  $J_{\text{C-P}}$  = 8.7 Hz), 128.7, 128.5 (d,  $J_{\text{C-P}}$  = 10.7 Hz), 127.8 (d,  $J_{\text{C-P}}$  = 11.3 Hz), 115.8, 111.8, 56.2 (d,  $J_{\text{C-P}}$  = 80.6 Hz), 45.3, 29.4, 28.1 (d,  $J_{\text{C-P}}$  = 4.7 Hz), 25.5 (d,  $J_{\text{C-P}}$  = 3.2 Hz), 25.2 (d,  $J_{\text{C-P}}$  = 11.7 Hz);

**$^{31}\text{P}$  NMR (162 MHz,  $\text{CDCl}_3$ )**  $\delta$  30.7.

**HRMS (ESI)** for  $\text{C}_{24}\text{H}_{27}\text{NOP}$   $[\text{M}+\text{H}]^+$  calcd. 376.1825, found: 376.1824.

### Diphenyl(1-phenylazocan-2-yl)phosphine oxide (**3v**)

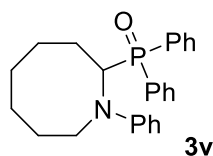

Following the general procedure, compound **3v** was obtained as a white solid in 73% yield; mp = 204-206 °C;  $R_f$  = 0.61 (PE:*i*PrOH = 5:1);

**$^1\text{H}$  NMR (400 MHz,  $\text{CDCl}_3$ )**  $\delta$  7.93-7.82 (m, 1H), 7.62-7.44 (m, 3H), 7.25 -7.17 (m, 1H), 7.14-7.07 (m, 1H), 7.05-6.97 (m, 1H), 6.62-6.45 (m, 2H), 4.68 (dt,  $J$  = 12.1, 2.8 Hz, 1H), 4.03-3.78 (m, 1H), 3.58 (d,  $J$  = 15.6 Hz, 1H), 2.61-2.38 (m, 1H), 1.94-1.68 (m, 1H), 1.58-1.40 (m, 3H), 1.39-1.23 (m, 1H);

**<sup>13</sup>C NMR (101 MHz, CDCl<sub>3</sub>)**  $\delta$  147.2, 132.2 (d,  $J_{C-P}$  = 81.8 Hz), 131.6 (d,  $J_{C-P}$  = 2.7 Hz), 131.2 (d,  $J_{C-P}$  = 2.7 Hz), 130.9 (d,  $J_{C-P}$  = 9.9 Hz), 130.7 (d,  $J_{C-P}$  = 8.7 Hz), 128.8, 128.7 (d,  $J_{C-P}$  = 10.6 Hz), 127.6 (d,  $J_{C-P}$  = 11.3 Hz), 116.0, 113.1, 58.2 (d,  $J_{C-P}$  = 73.4 Hz), 43.7, 26.9 (d,  $J_{C-P}$  = 13.4 Hz), 25.6, 24.89, 24.4, 23.7 (d,  $J_{C-P}$  = 5.0 Hz);

**<sup>31</sup>P NMR (162 MHz, CDCl<sub>3</sub>)**  $\delta$  32.6.

**HRMS (ESI)** for C<sub>25</sub>H<sub>29</sub>NOP [M+H]<sup>+</sup> calcd. 390.1981, found: 390.1979.

### Diphenyl(1-phenylazonan-2-yl)phosphine oxide (**3w**)

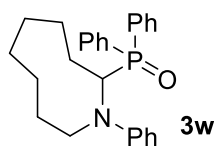

Following the general procedure, compound **3w** was obtained as a white solid in 36% yield; mp = 178-180 °C; R<sub>f</sub> = 0.67 (PE:*i*PrOH = 5:1);

**<sup>1</sup>H NMR (400 MHz, CDCl<sub>3</sub>)**:  $\delta$  7.89-7.78 (m, 2H), 7.59-7.44 (m, 5H), 7.30-7.19 (m, 1H), 7.14-7.01 (m, 4H), 6.64-6.50 (m, 3H), 4.64 (d,  $J$  = 12.4 Hz, 1H), 3.89 (t,  $J$  = 13.2 Hz, 1H), 3.36 (d,  $J$  = 15.0 Hz, 1H), 2.48-2.27 (m, 1H), 1.86-1.55 (m, 2H), 1.51-1.38 (m, 3H), 1.38-1.25 (m, 1H);

**<sup>13</sup>C NMR (101 MHz, CDCl<sub>3</sub>)**:  $\delta$  148.2, 132.9 (d,  $J_{C-P}$  = 82.8 Hz), 131.6 (d,  $J_{C-P}$  = 2.6 Hz), 131.5 (d,  $J_{C-P}$  = 94.9 Hz), 131.2 (d,  $J_{C-P}$  = 2.7 Hz), 130.9 (d,  $J_{C-P}$  = 10.0 Hz), 130.4 (d,  $J_{C-P}$  = 8.7 Hz), 128.8, 128.7 (d,  $J_{C-P}$  = 10.7 Hz), 127.7 (d,  $J_{C-P}$  = 11.3 Hz), 116.8, 114.3, 61.0 (d,  $J_{C-P}$  = 68.0 Hz), 42.7, 25.6, 24.3, 23.6, 23.5 (d,  $J_{C-P}$  = 4.8 Hz), 22.6, 22.1.

**<sup>31</sup>P NMR (162 MHz, CDCl<sub>3</sub>)**:  $\delta$  32.4.

**HRMS (ESI)** for C<sub>26</sub>H<sub>31</sub>NOP [M+H]<sup>+</sup> calcd. 404.2138, found: 404.2135.

### (5-methyl-1-phenylpyrrolidin-2-yl)diphenylphosphine oxide (**3x**)

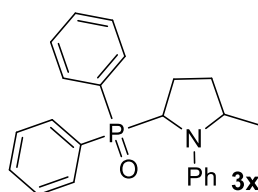

Following the general procedure, compound **3x** was obtained as a white solid in 71% yield (dr = 2.4:1); mp = 120-122 °C;  $R_f$  = 0.31 (PE:*i*PrOH = 10:1);

**Major:**  $^1\text{H NMR}$  (400 MHz,  $\text{CDCl}_3$ ):  $\delta$  7.96-7.91 (m, 2H), 7.74-7.70 (m, 2H), 7.61-7.52 (m, 3H), 7.72-7.67 (m, 1H), 7.32-7.25 (m, 2H), 6.98-6.94 (m, 2H), 6.61-6.57 (m, 1H), 6.40-6.38 (m, 2H), 4.64-4.60 (m, 1H), 3.82-3.79 (m, 1H), 2.30-2.23 (m, 1H), 2.12-1.98 (m, 3H), 1.43 (d,  $J=6.0$  Hz, 3H); **minor:**  $^1\text{H NMR}$  (400 MHz,  $\text{CDCl}_3$ ):  $\delta$  7.84-7.79 (m, 2H), 7.65-7.60 (m, 2H), 7.50-7.46 (m, 1H), 7.43-7.35 (m, 3H), 7.29-7.24 (m, 2H), 6.85-6.81 (m, 2H), 6.46-6.41 (m, 3H), 4.89-4.84 (m, 1H), 4.26-4.19 (m, 1H), 2.49-2.28 (m, 2H), 2.16-2.08 (m, 1H), 1.58-1.53 (m, 1H), 1.01 (d,  $J=6.0$  Hz, 3H);

**Major:**  $^{13}\text{C NMR}$  (101 MHz,  $\text{CDCl}_3$ ):  $\delta$  148.0 (d,  $J_{C-P} = 1.5$  Hz), 131.94 (d,  $J_{C-P} = 93.5$  Hz), 131.92 (d,  $J_{C-P} = 2.6$  Hz), 131.87 (d,  $J_{C-P} = 2.4$  Hz), 131.79, 131.7 (d,  $J_{C-P} = 2.6$  Hz), 131.1 (d,  $J_{C-P} = 89.2$  Hz), 128.6 (d,  $J_{C-P} = 10.8$  Hz), 128.4, 128.2 (d,  $J_{C-P} = 10.8$  Hz), 117.2, 113.5, 63.7 (d,  $J_{C-P} = 87.9$  Hz), 57.8, 33.0, 27.1 (d,  $J_{C-P} = 1.8$  Hz), 20.7;

**Minor:**  $^{13}\text{C NMR}$  (101 MHz,  $\text{CDCl}_3$ ):  $\delta$  145.1, 132.5 (d,  $J_{C-P} = 87.7$  Hz), 131.9 (d,  $J_{C-P} = 8.7$  Hz), 131.6 (d,  $J_{C-P} = 2.5$  Hz), 131.55 (d,  $J_{C-P} = 2.5$  Hz), 131.47 (d,  $J_{C-P} = 90.9$  Hz), 131.46 (d,  $J_{C-P} = 8.4$  Hz), 128.4 (d,  $J_{C-P} = 10.9$  Hz), 128.2, 127.9 (d,  $J_{C-P} = 10.9$  Hz), 116.8, 58.9 (d,  $J_{C-P} = 81.1$  Hz), 55.1, 31.5, 25.3, 17.8 (d,  $J_{C-P} = 3.0$  Hz);

**Major:**  $^{31}\text{P NMR}$  (162 MHz,  $\text{CDCl}_3$ )  $\delta$  28.8; **Minor:**  $^{31}\text{P NMR}$  (162 MHz,  $\text{CDCl}_3$ )  $\delta$  26.9.

**HRMS (ESI)** for  $\text{C}_{23}\text{H}_{25}\text{NOP}$   $[\text{M}+\text{H}]^+$  calcd. 362.1668, found: 362.1665.

### ((methyl(phenyl)amino)methyl)diphenylphosphine oxide (**3y**)

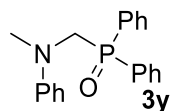

Following the general procedure, compound **3y** was obtained as a white solid in 37% yield; mp = 110-112 °C;  $R_f$  = 0.24 (PE:*i*PrOH = 10:1);

$^1\text{H NMR}$  (600 MHz,  $\text{CDCl}_3$ ):  $\delta$  7.83-7.80 (m, 4H), 7.54-7.52 (m, 2H), 7.47-7.44 (m, 4H), 7.14-7.12 (m, 2H), 6.72-6.69 (m, 3H), 4.19 (d,  $J = 3.6$  Hz, 2H), 2.93 (s, 3H);

**<sup>13</sup>C NMR (151 MHz, CDCl<sub>3</sub>):**  $\delta$  149.9 (d,  $J_{C-P}$  = 3 Hz), 132.0 (d,  $J_{C-P}$  = 2.1 Hz) 131.6 (d,  $J_{C-P}$  = 96.0 Hz), 131.3 (d,  $J_{C-P}$  = 9.0 Hz), 128.9, 128.6 (d,  $J_{C-P}$  = 10.5 Hz), 117.8, 113.4, 55.3 (d,  $J_{C-P}$  = 82.5 Hz), 39.9.

**<sup>31</sup>P NMR (243 MHz, CDCl<sub>3</sub>):**  $\delta$  32.4.

**HRMS (ESI)** for C<sub>20</sub>H<sub>21</sub>NOP [M+H]<sup>+</sup> calcd. 322.1355, found: 322.1353.

**(1-Phenylpyrrolidin-2-yl)di-o-tolylphosphine oxide (4a)**

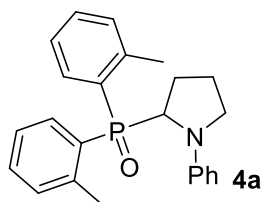

Following the general procedure, compound **4a** was obtained as a white solid in 47% yield; mp = 138-140 °C; R<sub>f</sub> = 0.68 (PE:iPrOH = 5:1);

**<sup>1</sup>H NMR (400 MHz, CDCl<sub>3</sub>):**  $\delta$  7.63-7.51 (m, 1H), 7.49-7.40 (m, 1H), 7.34-7.26 (m, 2H), 7.23-7.14 (m, 2H), 7.14-7.01 (m, 1H), 6.96-6.87 (m, 3H), 6.51 (t,  $J$  = 7.2 Hz, 1H), 6.38 (d,  $J$  = 8.2 Hz, 2H), 5.06-4.81 (m, 1H), 3.69 (t,  $J$  = 8.5 Hz, 1H), 3.32-3.17 (m, 1H), 2.58-2.50 (m, 1H), 2.47 (d,  $J$  = 10.2 Hz, 5H), 2.41-2.23 (m, 2H), 2.01-1.85 (m, 1H);

**<sup>13</sup>C NMR (101 MHz, CDCl<sub>3</sub>):**  $\delta$  147.6, 144.5 (d,  $J_{C-P}$  = 7.0 Hz), 144.1 (d,  $J_{C-P}$  = 5.8 Hz), 132.6 (d,  $J_{C-P}$  = 9.1 Hz), 131.9 (d,  $J_{C-P}$  = 10.1 Hz), 131.7 (d,  $J_{C-P}$  = 2.3 Hz), 131.5 (d,  $J_{C-P}$  = 2.6 Hz), 131.4 (d,  $J_{C-P}$  = 12.1 Hz), 131.2 (d,  $J_{C-P}$  = 10.1 Hz), 131.12 (d,  $J_{C-P}$  = 88.9 Hz), 131.11 (d,  $J_{C-P}$  = 86.9 Hz), 128.2, 125.1 (d,  $J_{C-P}$  = 7.1 Hz), 125.0 (d,  $J_{C-P}$  = 8.2 Hz), 116.4, 112.8, 58.9 (d,  $J_{C-P}$  = 86.9 Hz), 50.5, 28.9, 24.0, 21.6 (d,  $J_{C-P}$  = 3.9 Hz), 21.2 (d,  $J_{C-P}$  = 2.9 Hz);

**<sup>31</sup>P NMR (162 MHz, CDCl<sub>3</sub>):**  $\delta$  34.9.

**HRMS (ESI)** for C<sub>24</sub>H<sub>27</sub>NOP [M+H]<sup>+</sup> calcd. 376.1825, found:376.1824.

**(1-Phenylpyrrolidin-2-yl)di-p-tolylphosphine oxide (4b)**

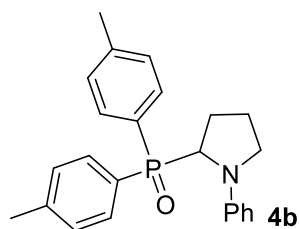

Following the general procedure, compound **4b** was obtained as a white solid in 59% yield; mp = 172-174 °C;  $R_f$  = 0.58 (PE:*i*PrOH = 5:1);

**$^1\text{H}$  NMR (600 MHz,  $\text{CDCl}_3$ ):**  $\delta$  7.82-7.69 (m, 1H), 7.70-7.60 (m, 1H), 7.30-7.20 (m, 1H), 7.17-7.08 (m, 1H), 7.00-6.90 (m, 1H), 6.55 (t,  $J$  = 7.2 Hz, 1H), 6.36 (d,  $J$  = 8.2 Hz, 1H), 4.62 (t,  $J$  = 8.5 Hz, 1H), 3.67-3.44 (m, 1H), 3.19 (td,  $J$  = 9.7, 2.7 Hz, 1H), 2.50-2.42 (m, 1H), 2.40 (s, 1H), 2.31 (s, 1H), 2.18-2.03 (m, 1H), 2.03-1.81 (m, 1H);

**$^{13}\text{C}$  NMR (151 MHz,  $\text{CDCl}_3$ ):**  $\delta$  147.9, 142.2 (d,  $J_{\text{C-P}}$  = 2.5 Hz), 142.1 (d,  $J_{\text{C-P}}$  = 2.3 Hz), 131.9 (d,  $J_{\text{C-P}}$  = 8.8 Hz), 131.7 (d,  $J_{\text{C-P}}$  = 8.7 Hz), 129.3 (d,  $J_{\text{C-P}}$  = 11.0 Hz), 128.9 (d,  $J_{\text{C-P}}$  = 11.1 Hz), 128.7 (d,  $J_{\text{C-P}}$  = 92.2 Hz), 128.4, 128.4 (d,  $J_{\text{C-P}}$  = 94.9 Hz), 116.6, 113.2, 60.6 (d,  $J_{\text{C-P}}$  = 86.9 Hz), 50.8, 27.7, 24.1, 21.5 (d,  $J_{\text{C-P}}$  = 13.1 Hz);

**$^{31}\text{P}$  NMR (162 MHz,  $\text{CDCl}_3$ ):**  $\delta$  27.7.

**HRMS (ESI)** for  $\text{C}_{24}\text{H}_{26}\text{NOP}$  [ $\text{M}+\text{H}$ ] $^+$  calcd. 376.1825, found:376.1827.

#### **Bis(4-(tert-butyl)phenyl)(1-phenylpyrrolidin-2-yl)phosphine oxide (4c)**

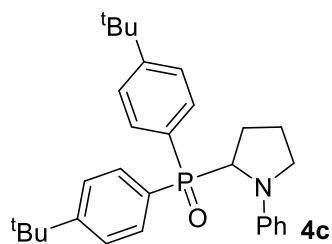

Following the general procedure, compound **4c** was obtained as a white solid in 82% yield; mp = 240-242 °C;  $R_f$  = 0.68 (PE:*i*PrOH = 5:1);

**$^1\text{H}$  NMR (400 MHz,  $\text{CDCl}_3$ ):**  $\delta$  7.90-7.73 (m, 1H), 7.73-7.60 (m, 1H), 7.48 (dd,  $J$  = 8.2, 2.1 Hz, 1H), 7.31 (dd,  $J$  = 8.3, 2.3 Hz, 1H), 6.88 (t,  $J$  = 7.9 Hz, 1H), 6.50 (t,  $J$  = 7.2 Hz, 1H), 6.29 (d,  $J$  = 8.2 Hz, 1H), 4.62 (t,  $J$  = 8.8 Hz, 1H), 3.64 (t,  $J$  = 7.7 Hz, 1H), 3.45-2.95 (m, 1H), 2.58-2.33 (m, 1H), 2.29-1.94 (m, 1H), 1.94-1.78 (m, 1H), 1.33 (s, 4H), 1.25 (s, 4H);

**<sup>13</sup>C NMR (101 MHz, CDCl<sub>3</sub>):**  $\delta$  155.3 (d,  $J_{C-P}$  = 2.7 Hz), 155.2 (d,  $J_{C-P}$  = 2.8 Hz), 147.8, 131.8 (d,  $J_{C-P}$  = 9.0 Hz), 131.6 (d,  $J_{C-P}$  = 8.6 Hz), 128.6 (d,  $J_{C-P}$  = 91.8 Hz), 128.5 (d,  $J_{C-P}$  = 95.2 Hz), 128.4, 125.6 (d,  $J_{C-P}$  = 11.0 Hz), 125.2 (d,  $J_{C-P}$  = 11.2 Hz), 116.5, 113.1, 60.4 (d,  $J_{C-P}$  = 86.8 Hz), 50.8, 35.0, 34.9, 31.1, 31.1, 27.8, 24.2;

**<sup>31</sup>P NMR (162 MHz, CDCl<sub>3</sub>):**  $\delta$  27.3.

**HRMS (ESI)** for C<sub>30</sub>H<sub>39</sub>NOP [M+H]<sup>+</sup> calcd. 460.2764, found: 460.2764.

**Bis(3,5-dimethylphenyl)(1-phenylpyrrolidin-2-yl)phosphine oxide (4d)**

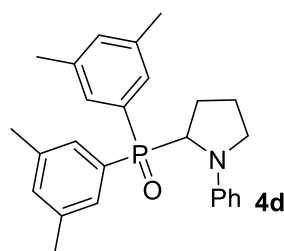

Following the general procedure, compound **4d** was obtained as a white solid in 45% yield; mp = 124-126 °C; R<sub>f</sub> = 0.67 (PE:iPrOH = 5:1);

**<sup>1</sup>H NMR (400 MHz, CDCl<sub>3</sub>):**  $\delta$  7.49 (d,  $J$  = 10.6 Hz, 1H), 7.31 (d,  $J$  = 10.9 Hz, 1H), 7.17 (s, 1H), 7.01 (s, 1H), 6.98-6.90 (m, 1H), 6.55 (t,  $J$  = 7.2 Hz, 1H), 6.36 (d,  $J$  = 8.2 Hz, 1H), 4.64 (t,  $J$  = 8.7 Hz, 1H), 3.73-3.57 (m, 1H), 3.32-3.11 (m, 1H), 2.47-2.37 (m, 1H), 2.34 (s, 3H), 2.19 (s, 3H), 2.16-2.00 (m, 1H), 1.97-1.75 (m, 1H);

**<sup>13</sup>C NMR (101 MHz, CDCl<sub>3</sub>):**  $\delta$  147.8, 138.3 (d,  $J_{C-P}$  = 11.4 Hz), 137.8 (d,  $J_{C-P}$  = 11.7 Hz), 133.5 (d,  $J_{C-P}$  = 2.8 Hz), 133. (d,  $J_{C-P}$  = 2.9 Hz), 131.5 (d,  $J_{C-P}$  = 91.9 Hz), 131.3 (d,  $J_{C-P}$  = 88.5 Hz), 129.4 (d,  $J_{C-P}$  = 8.8 Hz), 129.3 (d,  $J_{C-P}$  = 8.3 Hz), 128.3, 116.5, 113.2, 60.0 (d,  $J_{C-P}$  = 85.8 Hz), 50.7, 27.8, 24.2, 21.3, 21.1;

**<sup>31</sup>P NMR (162 MHz, CDCl<sub>3</sub>):**  $\delta$  28.1.

**HRMS (ESI)** for C<sub>26</sub>H<sub>31</sub>NOP [M+H]<sup>+</sup> calcd. 404.2138, found: 404.2136.

**Bis(4-methoxyphenyl)(1-phenylpyrrolidin-2-yl)phosphine oxide (4e)**

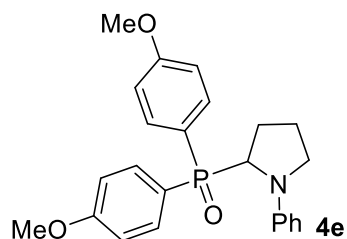

Following the general procedure, compound **4e** was obtained as a white solid in 44% yield; mp = 198-200 °C;  $R_f$  = 0.47 (PE:*i*PrOH = 5:1);

**$^1\text{H}$  NMR (400 MHz,  $\text{CDCl}_3$ ):**  $\delta$  7.86-7.74 (m, 1H), 7.72-7.61 (m, 1H), 7.02-6.91 (m, 2H), 6.83 (dd,  $J$  = 8.7, 2.1 Hz, 1H), 6.56 (t,  $J$  = 7.2 Hz, 1H), 6.36 (d,  $J$  = 8.2 Hz, 1H), 4.59 (t,  $J$  = 8.3 Hz, 1H), 3.84 (s, 1H), 3.77 (s, 1H), 3.61-3.52 (m, 1H), 3.27-3.06 (m, 1H), 2.52-2.35 (m, 1H), 2.22-2.01 (m, 1H), 1.99-1.74 (m, 1H);

**$^{13}\text{C}$  NMR (101 MHz,  $\text{CDCl}_3$ ):**  $\delta$  162.3 (d,  $J_{\text{C-P}}$  = 2.0 Hz), 147.8, 133.6 (d,  $J_{\text{C-P}}$  = 9.8 Hz), 133.4 (d,  $J_{\text{C-P}}$  = 9.6 Hz), 128.4, 123.1 (d,  $J_{\text{C-P}}$  = 96.1 Hz), 122.8 (d,  $J_{\text{C-P}}$  = 99.2 Hz), 116.6, 114.1 (d,  $J_{\text{C-P}}$  = 11.7 Hz), 113.8 (d,  $J_{\text{C-P}}$  = 11.8 Hz), 113.1, 61.0, 60.2, 55.2, 55.2, 50.8, 27.6, 24.1;

**$^{31}\text{P}$  NMR (162 MHz,  $\text{CDCl}_3$ ):**  $\delta$  27.4.

**HRMS (ESI)** for  $\text{C}_{24}\text{H}_{27}\text{NO}_3\text{P}$   $[\text{M}+\text{H}]^+$  calcd. 408.1723, found: 408.1721.

#### Bis(3-fluorophenyl)(1-phenylpyrrolidin-2-yl)phosphine oxide (**4f**)

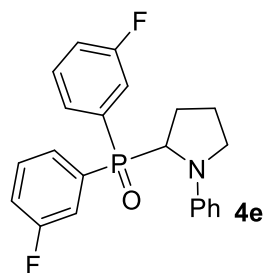

Following the general procedure, compound **4f** was obtained as a white solid in 77% yield; mp = 148-150 °C;  $R_f$  = 0.56 (PE:*i*PrOH = 5:1);

**$^1\text{H}$  NMR (400 MHz,  $\text{CDCl}_3$ ):**  $\delta$  7.75-7.58 (m, 1H), 7.58-7.43 (m, 2H), 7.36-7.21 (m, 1H), 7.11 (td,  $J$  = 8.4, 2.2 Hz, 1H), 6.96 (t,  $J$  = 7.9 Hz, 1H), 6.58 (t,  $J$  = 7.3 Hz, 1H), 6.37 (d,  $J$  = 8.2 Hz, 1H), 4.69 (t,  $J$  = 9.3 Hz, 1H), 3.68 (td,  $J$  = 8.6, 1.8 Hz, 1H), 3.31-3.07 (m, 1H), 2.56-2.32 (m, 1H), 2.32-1.69 (m, 2H);

**<sup>13</sup>C NMR (101 MHz, CDCl<sub>3</sub>):**  $\delta$  162.6 (dd,  $J_{C-F}$  = 251.5 Hz,  $J_{C-P}$  = 15.3 Hz), 162.3 (d,  $J_{C-F}$  = 251.5 Hz,  $J_{C-P}$  = 15.3 Hz), 147.4, 133.9 (dd,  $J_{C-P}$  = 88 Hz,  $J_{C-F}$  = 6 Hz), 133.8 (dd,  $J_{C-P}$  = 91 Hz,  $J_{C-F}$  = 6 Hz), 130.6 (dd,  $J_{C-F}$  = 13 Hz,  $J_{C-P}$  = 7 Hz), 130.1 (dd,  $J_{C-F}$  = 13 Hz,  $J_{C-P}$  = 8 Hz), 128.5, 127.4 (dd,  $J_{C-F}$  = 9 Hz,  $J_{C-P}$  = 3 Hz), 127.2 (dd,  $J_{C-F}$  = 8 Hz,  $J_{C-P}$  = 3 Hz), 119.17 (t,  $J_{C-F}$  = 20 Hz), 119.16 (t,  $J_{C-F}$  = 20 Hz), 118.7 (t,  $J_{C-F}$  = 9 Hz), 118.5 (t,  $J_{C-F}$  = 9 Hz), 117.3, 113.3, 60.1 (d,  $J_{C-P}$  = 87 Hz), 50.9, 27.5, 24.1;

**<sup>31</sup>P NMR (162 MHz, CDCl<sub>3</sub>):**  $\delta$  25.6;

**<sup>19</sup>F NMR (376 MHz, CDCl<sub>3</sub>):**  $\delta$  -110.4 (d,  $J$  = 4.9 Hz), -111.2 (d,  $J$  = 5.3 Hz).

**HRMS (ESI)** for C<sub>22</sub>H<sub>21</sub>F<sub>2</sub>NOP [M+H]<sup>+</sup> calcd. 384.1323, found: 384.1324.

#### **Bis(4-fluorophenyl)(1-phenylpyrrolidin-2-yl)phosphine oxide (4g)**

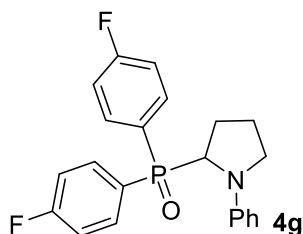

Following the general procedure, compound **4g** was obtained as a white solid in 98% yield; mp = 222-224 °C; R<sub>f</sub> = 0.55 (PE:*i*PrOH = 5:1);

**<sup>1</sup>H NMR (400 MHz, CDCl<sub>3</sub>):**  $\delta$  8.00-7.81 (m, 1H), 7.81-7.62 (m, 1H), 7.17 (td,  $J$  = 8.6, 1.8 Hz, 1H), 7.11-6.87 (m, 2H), 6.59 (t,  $J$  = 7.3 Hz, 1H), 6.35 (d,  $J$  = 8.2 Hz, 1H), 4.64 (t,  $J$  = 8.9 Hz, 1H), 3.85-3.48 (m, 1H), 3.35-3.15 (m, 1H), 2.60-2.32 (m, 1H), 2.32-2.04 (m, 1H), 2.04-1.76 (m, 1H);

**<sup>13</sup>C NMR (101 MHz, CDCl<sub>3</sub>):**  $\delta$  165.13 (d,  $J_{C-F}$  = 254.5 Hz), 165.11 (d,  $J_{C-F}$  = 254.5 Hz), 147.6, 134.3 (t,  $J_{C-F}$  = 9.1 Hz), 134.1 (t,  $J_{C-F}$  = 9.1 Hz), 128.6, 127.5 (dd,  $J_{C-P}$  = 91.9 Hz,  $J_{C-F}$  = 3.0 Hz), 127.3 (dd,  $J_{C-P}$  = 95.9 Hz,  $J_{C-F}$  = 3.0 Hz), 117.2, 116.1 (dd,  $J_{C-F}$  = 21.2 Hz,  $J_{C-P}$  = 12.1 Hz), 115.7 (dd,  $J_{C-F}$  = 21.2 Hz,  $J_{C-P}$  = 11.1 Hz), 113.3, 60.4 (d,  $J_{C-P}$  = 88.9 Hz), 51.0, 27.5, 24.2;

**<sup>19</sup>F NMR (376 MHz, CDCl<sub>3</sub>):**  $\delta$  -106.3, -106.7;

**<sup>31</sup>P NMR (162 MHz, CDCl<sub>3</sub>):**  $\delta$  26.2.

**HRMS (ESI)** for C<sub>22</sub>H<sub>21</sub>F<sub>2</sub>NOP [M+H]<sup>+</sup> calcd. 384.1323, found: 384.1321.



### Bis(4-chlorophenyl)(1-phenylpyrrolidin-2-yl)phosphine oxide (4h)

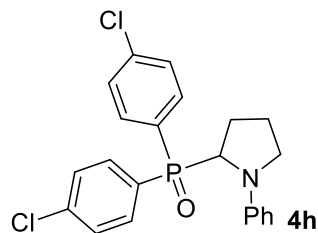

Following the general procedure, compound **4h** was obtained as a white solid in 79% yield; mp = 210-212 °C;  $R_f$  = 0.57 (PE:*i*PrOH = 5:1);

**<sup>1</sup>H NMR (400 MHz, CDCl<sub>3</sub>):**  $\delta$  7.79-7.68 (m, 1H), 7.66-7.56 (m, 1H), 7.38 (dd,  $J$  = 8.3, 1.8 Hz, 1H), 7.25 (dd,  $J$  = 8.3, 1.9 Hz, 1H), 6.91 (t,  $J$  = 7.9 Hz, 1H), 6.54 (t,  $J$  = 7.3 Hz, 1H), 6.28 (d,  $J$  = 8.2 Hz, 1H), 4.57 (t,  $J$  = 9.0 Hz, 1H), 3.69-3.48 (m, 1H), 3.15 (qd,  $J$  = 8.7, 2.7 Hz, 1H), 2.63-2.25 (m, 1H), 2.19-1.95 (m, 1H), 1.95-1.69 (m, 1H);

**<sup>13</sup>C NMR (101 MHz, CDCl<sub>3</sub>):**  $\delta$  147.5, 137.84 (d,  $J_{C-P}$  = 3.6 Hz), 137.79 (d,  $J_{C-P}$  = 3.5 Hz), 133.2 (d,  $J_{C-P}$  = 9.3 Hz), 133.0 (d,  $J_{C-P}$  = 9.1 Hz), 129.1 (d,  $J_{C-P}$  = 11.3 Hz), 128.7 (d,  $J_{C-P}$  = 11.3 Hz), 128.6, 117.4, 113.4, 60.4 (d,  $J_{C-P}$  = 87.4 Hz), 51.1, 27.6, 24.2;

**<sup>31</sup>P NMR (162 MHz, CDCl<sub>3</sub>):**  $\delta$  26.3.

**HRMS (ESI)** for C<sub>22</sub>H<sub>21</sub>Cl<sub>2</sub>NOP [M+H]<sup>+</sup> calcd. 416.0732, found: 416.0734.

### Di(naphthalen-2-yl)(1-phenylpyrrolidin-2-yl)phosphine oxide (4i)

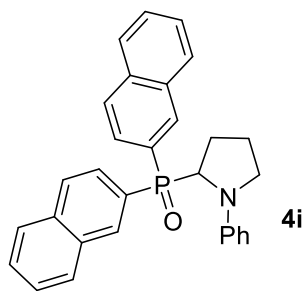

Following the general procedure, compound **4i** was obtained as a white solid in 84% yield; mp = 178-180 °C;  $R_f$  = 0.58 (PE:*i*PrOH = 5:1);

**<sup>1</sup>H NMR (400 MHz, CDCl<sub>3</sub>):**  $\delta$  8.55 (d,  $J$  = 12.4 Hz, 1H), 8.42 (d,  $J$  = 12.6 Hz, 1H), 7.95-7.73 (m, 8H), 7.62-7.40 (m, 4H), 6.82 (t,  $J$  = 7.9 Hz, 2H), 6.59-6.18 (m, 3H), 4.86

(t,  $J = 8.5$  Hz, 1H), 3.64 (t,  $J = 7.7$  Hz, 1H), 3.33-3.10 (m, 1H), 2.66-2.45 (m, 1H), 2.34-2.04 (m, 1H), 2.02-1.70 (m, 2H);

**$^{13}\text{C}$  NMR (101 MHz,  $\text{CDCl}_3$ ):**  $\delta$  147.9, 134.7 (d,  $J_{\text{C-P}} = 2.1$  Hz), 134.7 (d,  $J_{\text{C-P}} = 2.0$  Hz), 134.1 (d,  $J_{\text{C-P}} = 8.1$  Hz), 133.9 (d,  $J_{\text{C-P}} = 7.7$  Hz), 132.7 (d,  $J_{\text{C-P}} = 11.9$  Hz), 132.5 (d,  $J_{\text{C-P}} = 12.2$  Hz), 129.2 (d,  $J_{\text{C-P}} = 89.9$  Hz), 129.0 (d,  $J_{\text{C-P}} = 7.2$  Hz), 128.8 (d,  $J_{\text{C-P}} = 95.9$  Hz), 128.8 (d,  $J_{\text{C-P}} = 7.1$  Hz), 128.4, 128.3 (d,  $J_{\text{C-P}} = 10.1$  Hz), 128.0 (d,  $J_{\text{C-P}} = 14.1$  Hz), 127.9 (d,  $J_{\text{C-P}} = 11.1$  Hz), 127.6 (d,  $J_{\text{C-P}} = 14.1$  Hz), 126.69 (d,  $J_{\text{C-P}} = 25.2$  Hz), 126.66 (d,  $J_{\text{C-P}} = 9.1$  Hz), 126.4 (d,  $J_{\text{C-P}} = 9.1$  Hz), 116.9, 113.3, 60.6 (d,  $J_{\text{C-P}} = 86.7$  Hz), 50.9, 27.7, 24.2.

**$^{31}\text{P}$  NMR (162 MHz,  $\text{CDCl}_3$ ):**  $\delta$  27.7.

HRMS (ESI) for  $\text{C}_{30}\text{H}_{27}\text{NOP}$   $[\text{M}+\text{H}]^+$  calcd. 448.1825, found: 448.1821.

#### Phenyl(1-phenylpyrrolidin-2-yl)(p-tolyl)phosphine oxide (**4j**)

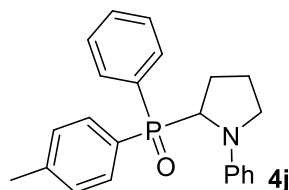

Following the general procedure, compound **4j** was obtained as a white solid in 99% yield; mp = 150-152 °C;  $R_f = 0.56$  (PE:iPrOH = 5:1);

**Major:**  $^1\text{H}$  NMR (600 MHz,  $\text{CDCl}_3$ ):  $\delta$  7.80-7.77 (m, 2H), 7.75-7.72 (m, 2H), 7.51-7.37 (m, 2H, overlapped), 7.29-7.28 (m, 3H), 6.95-6.91 (m, 2H), 6.54 (q,  $J=7.2$  Hz, 1H, overlapped), 6.36-6.34 (m, 2H, overlapped), 4.66-4.63 (m, 1H, overlapped), 3.62 (t,  $J=7.8$  Hz, 1H), 3.20-3.18 (m, 1H, overlapped), 2.50-2.42 (m, 1H, overlapped), 2.40 (s, 3H), 2.15-2.01 (m, 3H); **minor:**  $^1\text{H}$  NMR (600 MHz,  $\text{CDCl}_3$ ):  $\delta$  7.90-7.87 (m, 2H), 7.68-7.65 (m, 2H), 7.51-7.37 (m, 2H, overlapped), 7.15-7.14 (m, 3H), 6.95-6.91 (m, 2H, overlapped), 6.54 (q,  $J=7.2$  Hz, 1H, overlapped), 6.36-6.34 (m, 2H, overlapped), 4.66-4.63 (m, 1H, overlapped), 3.57 (t,  $J=7.8$  Hz, 1H), 3.20-3.18 (m, 1H, overlapped), 2.50-2.42 (m, 1H, overlapped), 2.32 (s, 3H), 1.90-1.86 (m, 3H);

**Major:**  $^{13}\text{C}$  NMR (151 MHz,  $\text{CDCl}_3$ ):  $\delta$  147.8, 142.3 (d,  $J_{\text{C-P}} = 1.5$  Hz), 132.0 (d,  $J_{\text{C-P}} = 88.5$  Hz), 131.8 (d,  $J_{\text{C-P}} = 9$  Hz), 131.6, 131.5(6) (d,  $J_{\text{C-P}} = 3.0$  Hz), 129.3 (d,  $J_{\text{C-P}} =$

10.5 Hz), 128.3, 128.2 (d,  $J_{C-P}$  = 88.5 Hz), 128.1 (d,  $J_{C-P}$  = 10.5 Hz), 116.6, 113.1, 60.6 (d,  $J_{C-P}$  = 87 Hz), 50.7, 27.7, 24.1, 21.5; **Minor:  $^{13}\text{C}$  NMR (151 MHz,  $\text{CDCl}_3$ ):**  $\delta$  147.8, 142.2 (d,  $J_{C-P}$  = 3 Hz), 132.2 (d,  $J_{C-P}$  = 88.5 Hz), 131.8 (d,  $J_{C-P}$  = 9 Hz), 131.7, 128.9 (d,  $J_{C-P}$  = 10.5 Hz), 128.5 (d,  $J_{C-P}$  = 10.5 Hz), 128.4, 128.0 (d,  $J_{C-P}$  = 94.5 Hz), 116.7, 113.2, 60.6 (d,  $J_{C-P}$  = 87 Hz), 50.8, 27.6, 24.1, 21.4;  
 $^{31}\text{P}$  NMR (243 MHz,  $\text{CDCl}_3$ )  $\delta$  27.7, 27.3.

HRMS (ESI) for  $\text{C}_{23}\text{H}_{25}\text{BNOP}$   $[\text{M}+\text{H}]^+$  calcd. 362.1668, found: 362.1668.

### Diethyl (1-phenylpyrrolidin-2-yl)phosphonate (**4k**)

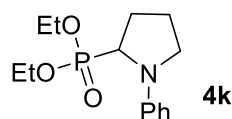

Following the general procedure, compound **4k** was obtained as a colorless oil in 74% yield;  $R_f$  = 0.23 (PE:EA = 3:1);

$^1\text{H}$  NMR (600 MHz,  $\text{CDCl}_3$ ):  $\delta$  7.25-7.22 (m, 2H), 6.82-6.80 (m, 2H), 6.75-6.73 (m, 1H), 4.16-4.10 (m, 2H), 4.09-4.04 (m, 2H), 3.95-3.89 (m, 1H), 3.60-3.58 (m, 1H), 3.21-3.16 (m, 1H), 2.42-2.34 (m, 2H), 2.11-2.02 (m, 2H), 1.31 (t,  $J_{C-P}$  = 7.2 Hz, 3H), 1.18 (t,  $J_{C-P}$  = 7.2 Hz, 3H);

$^{13}\text{C}$  NMR (151 MHz,  $\text{CDCl}_3$ ):  $\delta$  147.8, 128.8, 117.0, 113.2, 62.23 (d,  $J_{C-P}$  = 87.6 Hz), 62.18 (d,  $J_{C-P}$  = 87.6 Hz), 56.5 (d,  $J_{C-P}$  = 169.1 Hz), 49.7 (d,  $J_{C-P}$  = 1.5 Hz), 27.8, 24.3, 16.5 (t,  $J_{C-P}$  = 6.0 Hz).

$^{31}\text{P}$  NMR (243 MHz,  $\text{CDCl}_3$ ):  $\delta$  25.6.

HRMS (ESI) for  $\text{C}_{14}\text{H}_{23}\text{NO}_3\text{P}$   $[\text{M}+\text{H}]^+$  calcd. 284.1416, found: 284.1415.

## 5. Gram-scale reaction

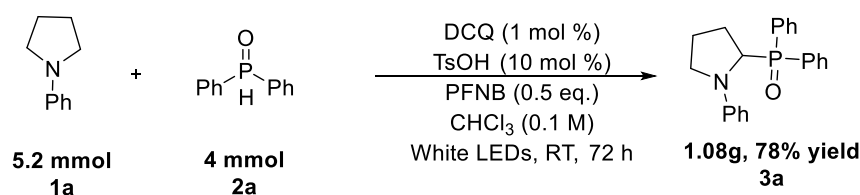

**General procedure:** A dried 10 mL reaction tube was charged with the photocatalyst (20.9 mg, 0.05 mmol, 1 mol %), *p*-TSA (0.5 mmol, 95 mg), PFNB (2.5 mmol, 0.33 mL), tertiary arylamine **1a** (5.2 mmol, 1.3 equiv, 0.6 mL), diphenylphosphine oxide **2** (4 mmol, 1.0 equiv, 0.81 g) and 40 mL CHCl<sub>3</sub>. The reaction mixture was degassed by three cycles of freeze-pump-thaw. After the mixture was thoroughly degassed, the reaction was under the irradiation of the white LEDs for 72 h. After completion of the reaction as checked by TLC. The reaction mixture was purified by silica gel flash column chromatography (petroleum ether/*i*PrOH) to give the corresponding product.

## 6. Transformations of product

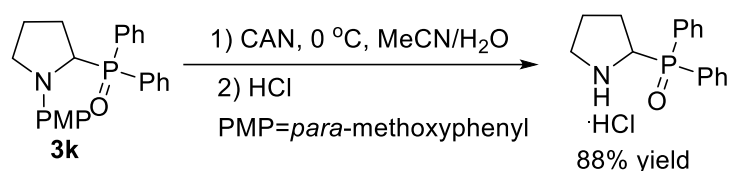

To a solution of product **3k** (1 equiv) in acetonitrile (0.1 M), under N<sub>2</sub>, at 0 °C, was slowly added a solution of ammonium cerium nitrate (5 equiv) in water (0.3 M to CAN). The reaction was allowed to stir for one hour at 0 °C, then two hours at rt. Upon complete consumption of the starting material (TLC), the reaction mixture was basified to pH ≈ 10 with an aqueous solution of NaOH 1M. Immediate precipitation of a dark red solid was observed and the reaction mixture was extracted with DCM. Then, the combined organic phases were acidified with aqueous HCl 2 M to pH ≈ 2 and washed with 2 M HCl one more time. The combined aqueous phases were concentrated under reduced pressure to afford a brown solid (NaCl), which after filtration and washing with MeOH and concentration under reduced pressure affords the corresponding pyrrolidine hydrochloride salt as a white solid.

### Diphenyl(pyrrolidin-2-yl)phosphine oxide hydrochloride (**5**)<sup>[3]</sup>

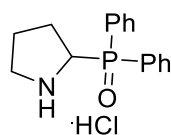

Compound **5** was obtained as a white solid in 88% yield;

**<sup>1</sup>H NMR (400 MHz, D<sub>2</sub>O):** δ 8.30-7.26 (m, 1H), 3.39 (d, *J* = 5.8 Hz, 1H), 2.37-1.88 (m, 1H);

**<sup>13</sup>C NMR (101 MHz, D<sub>2</sub>O):** δ 134.1 (d, *J*<sub>C-P</sub> = 2.7 Hz), 134.0 (d, *J*<sub>C-P</sub> = 2.5 Hz), 131.0 (d, *J*<sub>C-P</sub> = 3.4 Hz), 130.9 (d, *J*<sub>C-P</sub> = 3.5 Hz), 129.7 (d, *J*<sub>C-P</sub> = 12.4 Hz), 129.5 (d, *J*<sub>C-P</sub> = 12.7 Hz), 127.3 (d, *J*<sub>C-P</sub> = 2.2 Hz), 126.3, 55.9 (d, *J*<sub>C-P</sub> = 72.9 Hz), 48.1, 25.5, 24.1;

**<sup>31</sup>P NMR (162 MHz, D<sub>2</sub>O):** δ 32.9.

**HRMS (ESI)** for C<sub>22</sub>H<sub>27</sub>N<sub>3</sub>O<sub>4</sub> [M+H]<sup>+</sup> calcd. 272.1199, found: 272.1198.

## 7. Mechanistic investigations

### 7.1 Luminescence quenching experiments

Stern-Volmer experiments were conducted on an Agilent Technologies Cary Eclipse Fluorescence Spectrophotometer using the Cary Eclipse Scan Application. Rigorously purged (with nitrogen) solutions of each component were prepared prior to each set of experiments. Luminescence quenching experiments were run with CHCl<sub>3</sub> as the solvent. The solutions were irradiated at 410 nm and the luminescence was measured from 440 nm to 700 nm (emission maximum is at 530 nm). The concentration of DCQ stock solution was 0.3 mM in CHCl<sub>3</sub>. After being stirred with a thin glass rod, the emission spectrum was collected. Linear regression of I<sub>0</sub>/I against concentration is done in Origin.

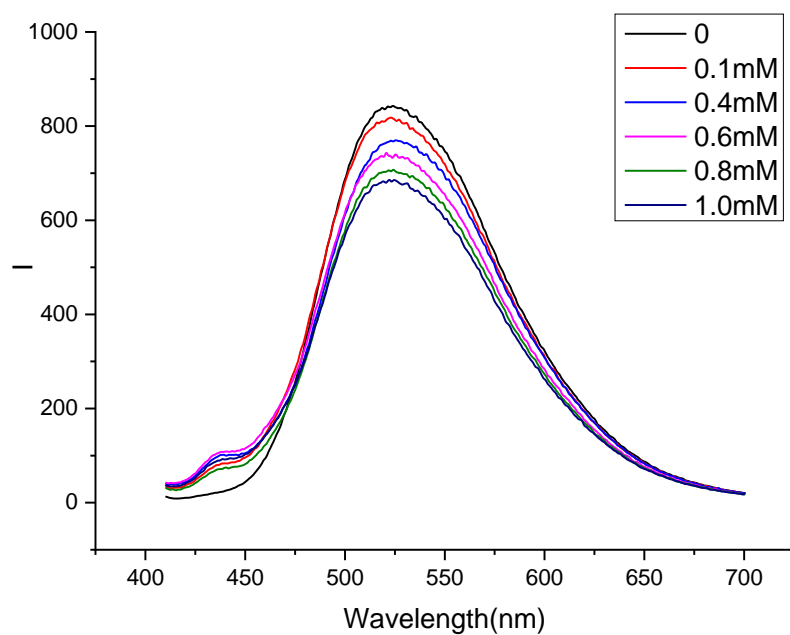

**Figure S6.** Fluorescence quenching data with DCQ and variable N-Ph pyrrolidine.

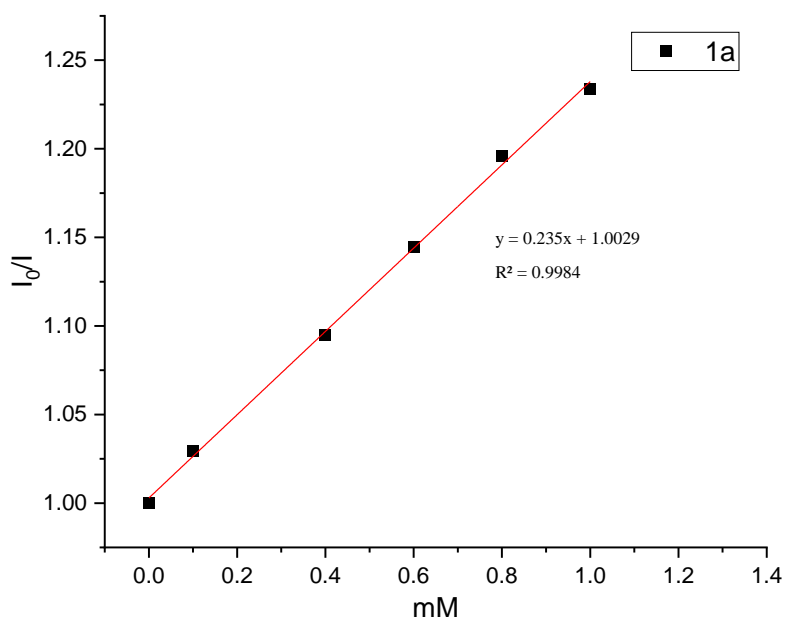

**Figure S7.** Stern-Volmer plot of DCQ with variable N-Ph pyrrolidine.

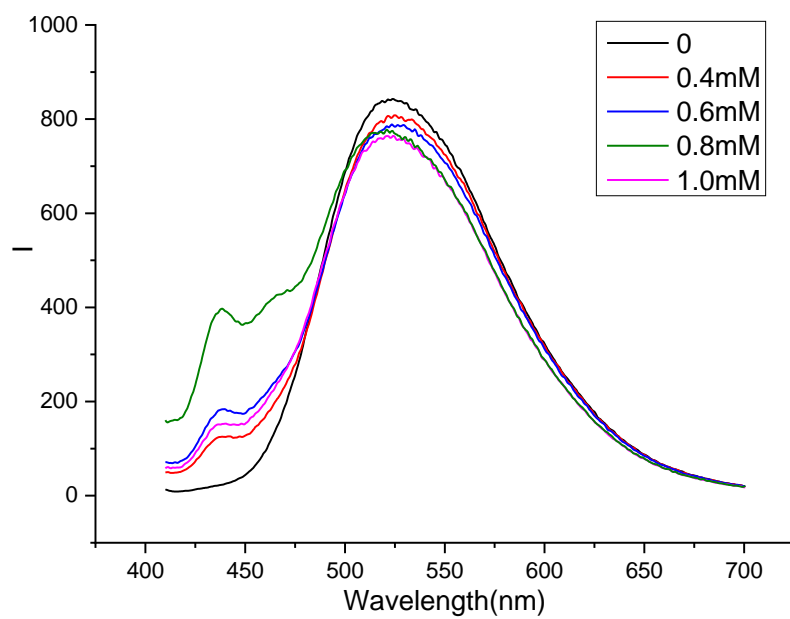

**Figure S8.** Fluorescence quenching data with DCQ and variable PFNB.

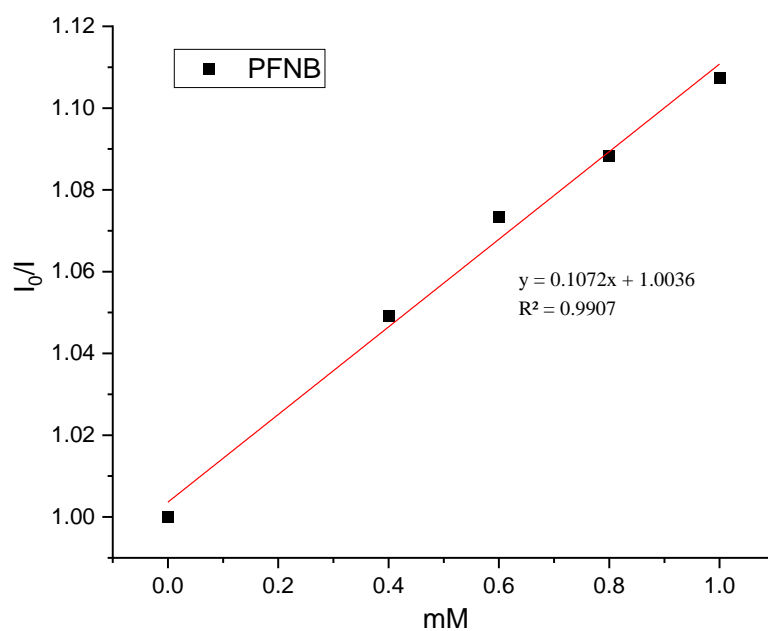

**Figure S9.** Stern-Volmer plot of DCQ with variable PFNB pyrrolidine.

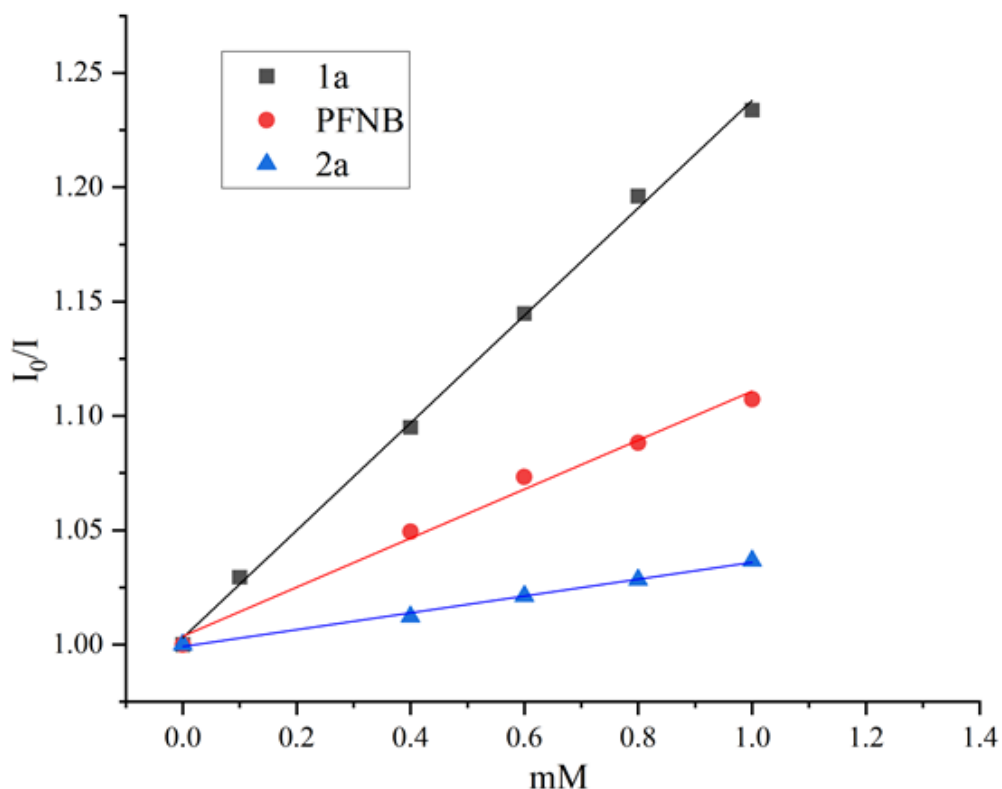

**Figure S10.** Stern-Volmer plot of DCQ with **1a**, **2a**, and PFNB.

## 7.2 Kinetic isotope effect

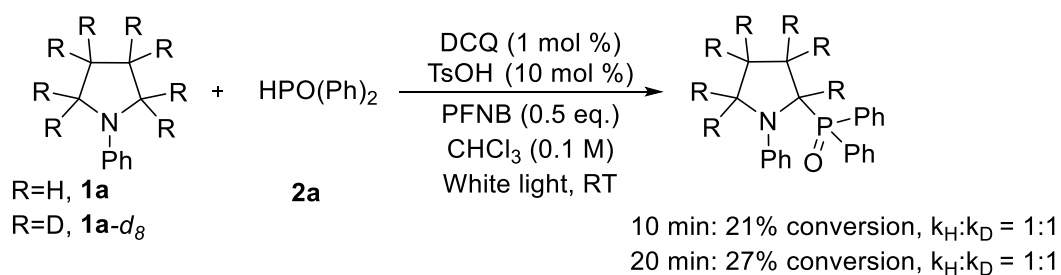

A dried 10 mL reaction tube was charged with the photocatalyst (0.001 mol, 0.4 mg), *p*-TSA (0.01 mmol, 1.9 mg), PFNB (0.05 mmol, 6.5  $\mu$ L), tertiary arylamine **1a** (0.065 mmol, 0.65 equiv) and *d*<sub>8</sub>-**1a'** (0.065 mmol, 0.65 equiv.), diphenylphosphine oxide **2a** (0.1 mmol, 1.0 equiv.) and 1.0 mL CHCl<sub>3</sub>. The reaction mixture was degassed by three cycles of freeze-pump-thaw. After the mixture was thoroughly degassed, the vial was placed beside a white LED light. The reaction was stirred at 25 °C for 10 and 20 min. The yields and  $k_H/k_D$  ratios were determined by the <sup>1</sup>H NMR spectrum.



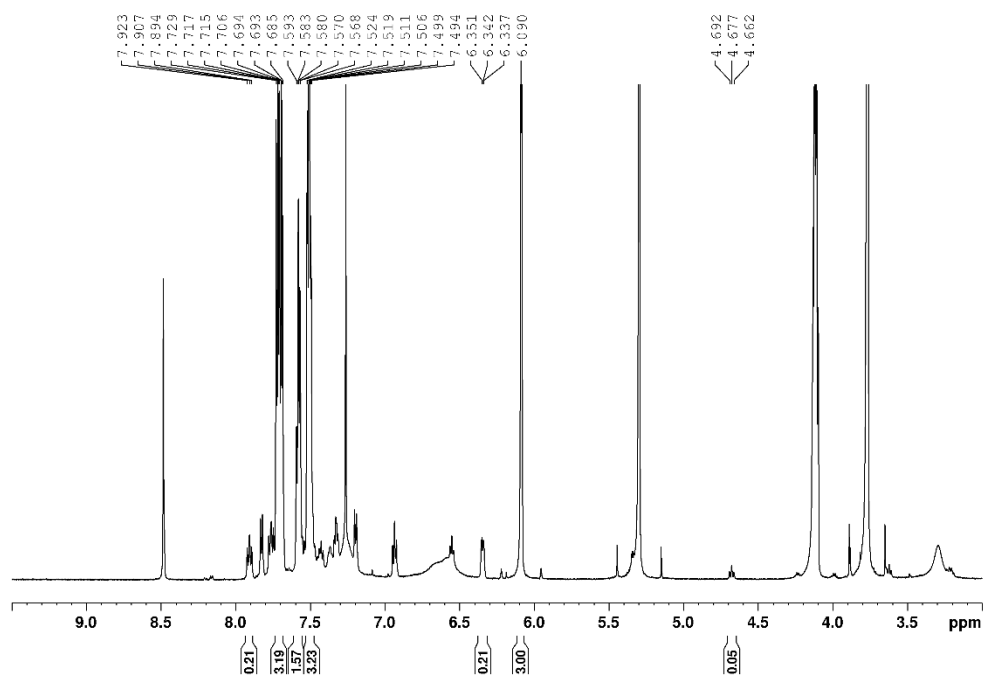

**Figure S11.**  $^1\text{H}$  NMR of the reaction mixture after reacting 10 min.

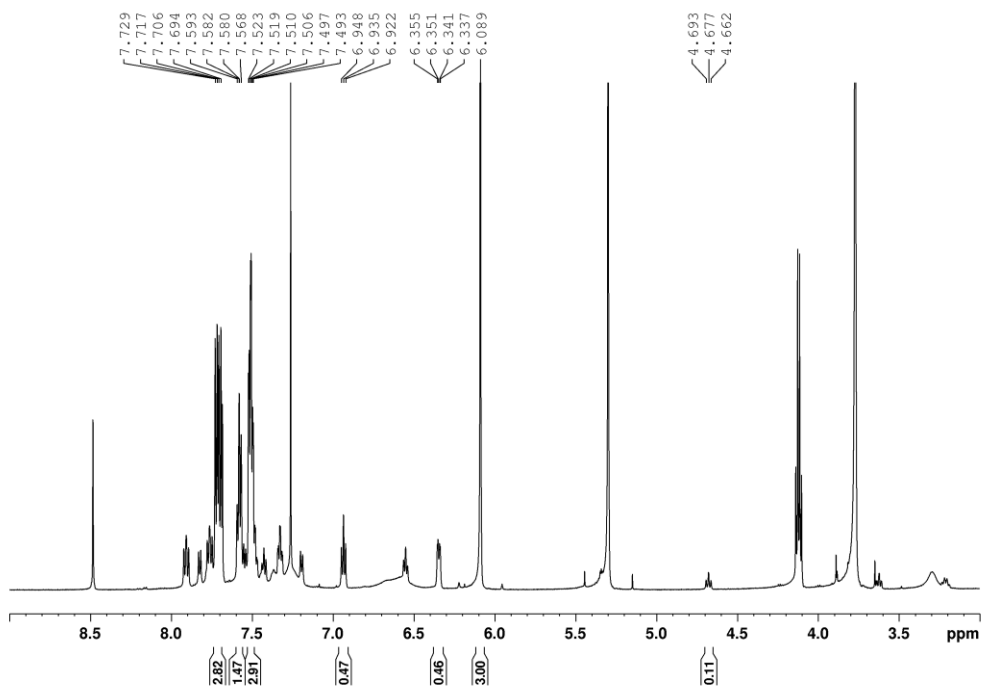

**Figure S12.**  $^1\text{H}$  NMR of the reaction mixture after reacting 20 min.



$$\text{mol Fe}^{2+} = \frac{V \cdot \Delta A}{l \cdot \varepsilon} \quad (\text{eq.1})$$

Where V is the total volume (0.00235 L) of the solution after addition of phenanthroline,  $\Delta A$  is the difference in absorbance at 510 nm between the irradiated and non-irradiated solutions,  $l$  is the path length (1.000 cm), and  $\varepsilon$  is the molar absorptivity at 510 nm (11,100 L mol<sup>-1</sup> cm<sup>-1</sup>).

The photon flux can be calculated using eq 2.

$$\text{photon flux} = \frac{\text{mol Fe}^{2+}}{\Phi \cdot t \cdot f} \quad (\text{eq.2})$$

Where  $\Phi$  is the quantum yield for the ferrioxalate actinometer (1.01 at  $\lambda=436$  nm),<sup>5</sup>  $t$  is the time (90.0 s), and  $f$  is the fraction of light absorbed at  $\lambda = 436$  nm by the ferrioxalate actinometer. This value is calculated using eq. 3, where  $A_{436 \text{ nm}}$  is the absorbance of the ferrioxalate solution at 436 nm.

$$f = 1 - 10^{-A_{436 \text{ nm}}} \quad (\text{eq.3})$$

**Sample calculation:**

$$\text{mol Fe}^{2+} = \frac{V \cdot \Delta A}{l \cdot \varepsilon} = \frac{0.00235 \text{ L} \cdot 1.244}{1.0 \text{ cm} \cdot 11,100 \text{ L} \cdot \text{mol}^{-1} \cdot \text{cm}^{-1}} = 2.63 \times 10^{-7} \text{ mol}$$

An absorption spectrum gave an  $A(436 \text{ nm})$  value of  $> 3$ , indicating that the fraction of absorbed light ( $f$ ) is about 1.0.

$$f = 1 - 10^{-A_{436 \text{ nm}}} \approx 1.0$$

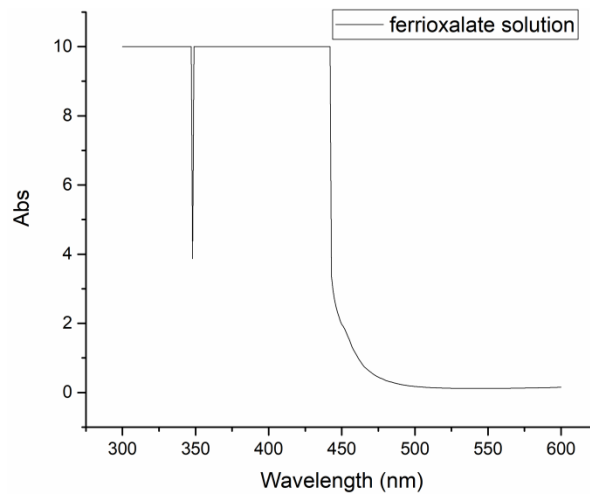

$$\text{photon flux} = \frac{\text{mol Fe}^{2+}}{\Phi \cdot t \cdot f} = \frac{2.63 \times 10^{-7} \text{ mol}}{1.01 \cdot 90.0 \text{ s} \cdot 1.0} = 2.89 \times 10^{-9} \text{ einstein} \cdot \text{s}^{-1}$$

## 2) Determination of the reaction quantum yield at 436 nm

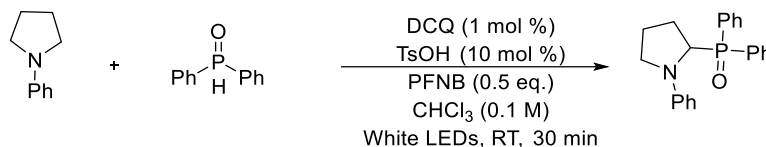

A dried 10 mL reaction tube was charged with the photocatalyst (0.001 mol, 0.4 mg), *p*-TSA (0.01 mmol, 1.9 mg), PFNB (0.05 mmol, 6.5  $\mu$ L), tertiary arylamine **1a** (0.13 mmol, 1.3 equiv), diphenylphosphine oxide **2a** (0.1 mmol, 1.0 equiv) and 1.0 mL  $\text{CHCl}_3$ . The reaction mixture was degassed by three cycles of freeze-pump-thaw. The mixture was stirred under nitrogen atmosphere at room temperature while irradiated by blue light (420–425 nm) for 30 minutes (1800 s). The reaction was irradiated in Parallel Light Reactor (WP-TEC-1020). After irradiation, the yield of the product **3a** was determined by  $^1\text{H}$  NMR based on a 1,3,5-trimethoxybenzene standard and the final yield was 15% ( $1.5 \cdot 10^{-5}$  mol).

The reaction quantum yield ( $\Phi$ ) was determined using eq. 4, where the photon flux is  $2.89 \cdot 10^{-9} \text{ E} \cdot \text{s}^{-1}$  (determined by actinometry as described above),  $t$  is the reaction time (1800 s) and  $f$  is the fraction of incident light absorbed by the reaction mixture, determined using eq. 3. An absorption spectrum of the reaction mixture gave an absorbance value of 2.45 at 436 nm, indicating that essentially all the incident light ( $f > 0.999$ ) is absorbed by the photocatalyst.

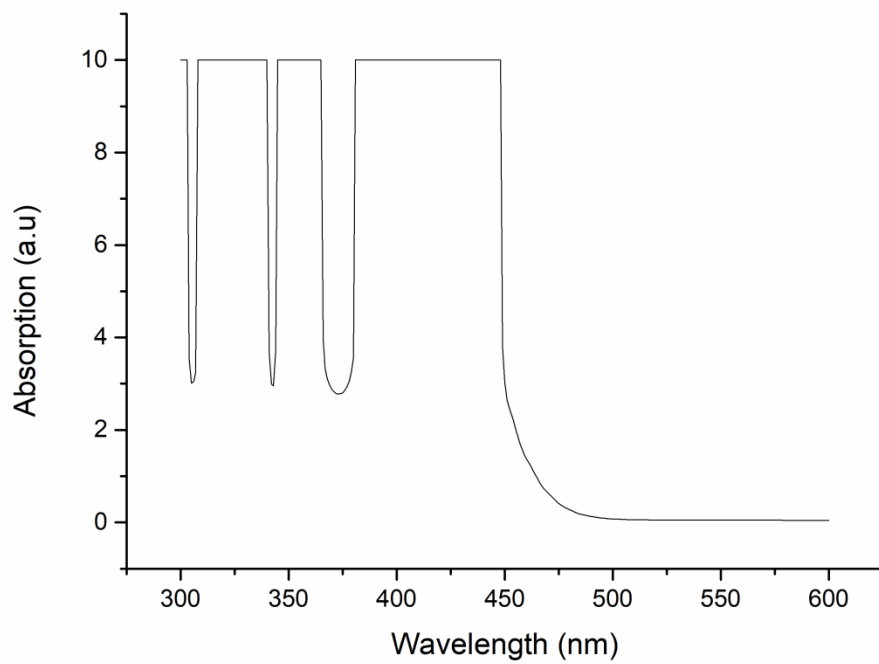

$$f = 1 - 10^{-A_{436nm}} = 1 - 10^{-2.45} = 0.996$$

$$\Phi = \frac{\text{mol of product formed}}{\text{photon flux} \cdot t \cdot f} = \frac{1.5 \times 10^{-5}}{2.89 \times 10^{-9} \times 1800 \text{s} \cdot 0.996} = 2.9$$

## 8. X-Ray crystallographic data of product 3h:

The crystal structure **3h** has been deposited at the Cambridge Crystallographic Data Centre and allocated the deposition number: CCDC 2112791.

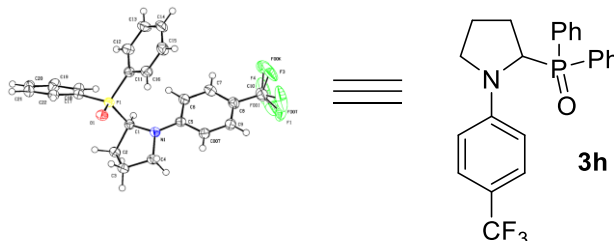

|                                                               |                                                      |                                                      |              |
|---------------------------------------------------------------|------------------------------------------------------|------------------------------------------------------|--------------|
| Bond precision:                                               | C-C = 0.0021 Å                                       | Wavelength=1.54184                                   |              |
| Cell:                                                         | a=8.8027(1)                                          | b=20.2100(2)                                         | c=11.4809(1) |
|                                                               | alpha=90                                             | beta=103.074(1)                                      | gamma=90     |
| Temperature:                                                  | 150 K                                                |                                                      |              |
|                                                               | Calculated                                           | Reported                                             |              |
| Volume                                                        | 1989.54(4)                                           | 1989.54(4)                                           |              |
| Space group                                                   | P 21/c                                               | P 1 21/c 1                                           |              |
| Hall group                                                    | -P 2ybc                                              | -P 2ybc                                              |              |
| Moiety formula                                                | C <sub>23</sub> H <sub>21</sub> F <sub>3</sub> N O P | C <sub>23</sub> H <sub>21</sub> F <sub>3</sub> N O P |              |
| Sum formula                                                   | C <sub>23</sub> H <sub>21</sub> F <sub>3</sub> N O P | C <sub>23</sub> H <sub>21</sub> F <sub>3</sub> N O P |              |
| Mr                                                            | 415.38                                               | 415.38                                               |              |
| D <sub>x</sub> , g cm <sup>-3</sup>                           | 1.387                                                | 1.387                                                |              |
| Z                                                             | 4                                                    | 4                                                    |              |
| Mu (mm <sup>-1</sup> )                                        | 1.595                                                | 1.595                                                |              |
| F <sub>000</sub>                                              | 864.0                                                | 864.0                                                |              |
| F <sub>000</sub> '                                            | 867.93                                               |                                                      |              |
| h,k,lmax                                                      | 11,25,14                                             | 11,25,14                                             |              |
| Nref                                                          | 4161                                                 | 3952                                                 |              |
| Tmin,Tmax                                                     | 0.875,0.938                                          | 0.718,1.000                                          |              |
| Tmin'                                                         | 0.839                                                |                                                      |              |
| Correction method= # Reported T Limits: Tmin=0.718 Tmax=1.000 |                                                      |                                                      |              |
| AbsCorr = MULTI-SCAN                                          |                                                      |                                                      |              |
| Data completeness= 0.950                                      |                                                      | Theta(max)= 76.137                                   |              |
| R(reflections)= 0.0377( 3591)                                 |                                                      | wR2(reflections)= 0.1012( 3952)                      |              |
| S = 1.048                                                     |                                                      | Npar= 289                                            |              |

## 9. Mechanistic computational analysis

All the DFT calculations at the M062X(D3)/6-31G(d) [7-8] level for neutral molecules or UM062X(D3)/6-31G(d) level for radical ions with the SMD [9] solvation model and DCM as the solvent were carried out to study the mechanism by Gaussian 09 [10]. Frequency calculations were carried out at the same level of theory to confirm their character as minima (no imaginary frequencies) or transition states (a single imaginary frequency). And the intrinsic reaction coordinate (IRC) calculations have confirmed that all stationary points were smoothly connected to each other. We have used Gauss View [11] programs to generate ball and stick geometries of optimized structures. The electron spin density with iso value of 0.02 are visualized by wave function analysis software Multiwfn-3.8 [12] program and visualization software VMD [13] to generate the scheme of the electron spin density.

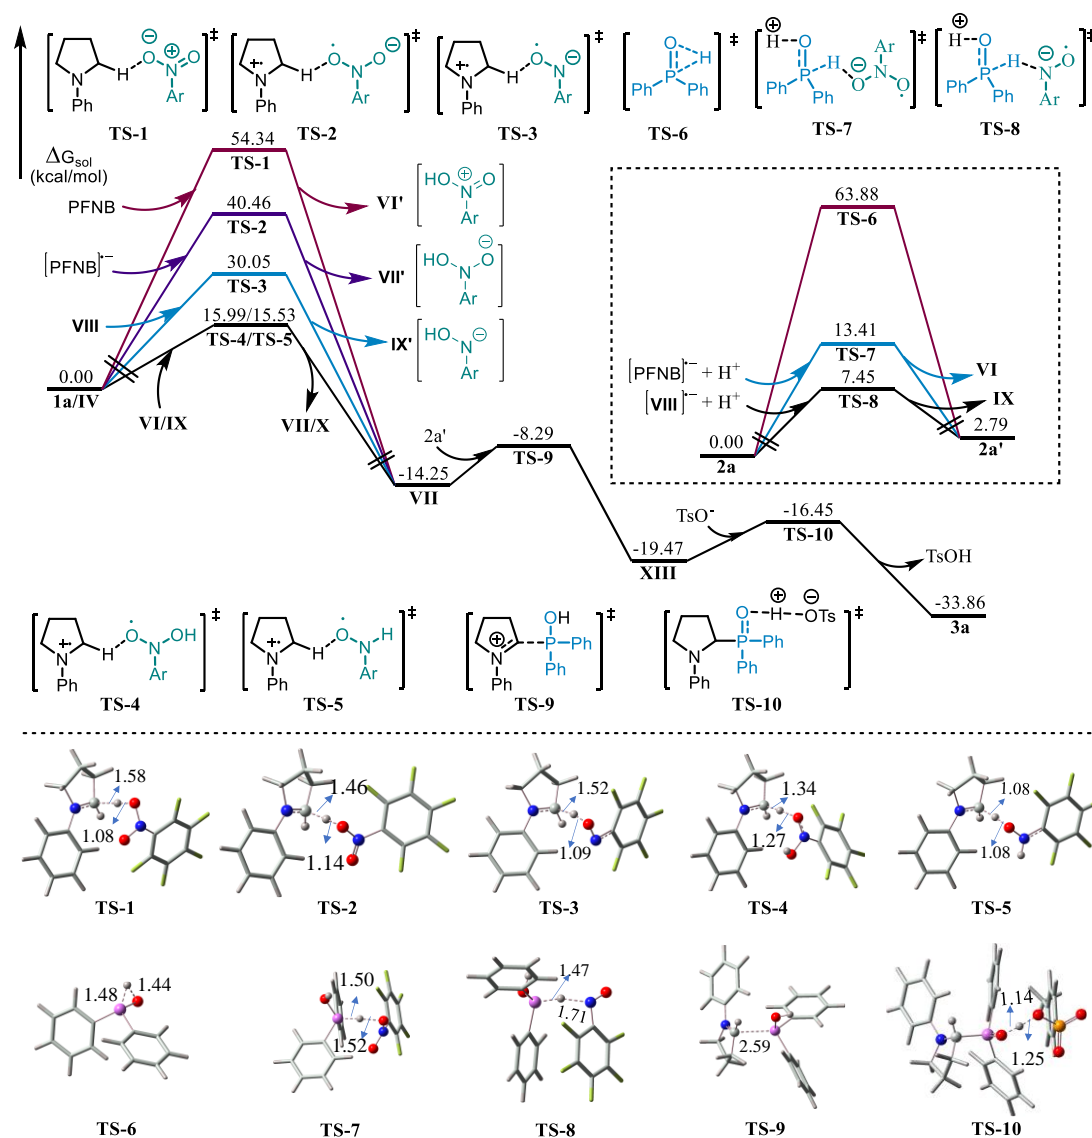

**Figure S13.** Free energy reaction profile of the proposed mechanism.

**Table S6.** Standard orientation of All Stationary Points and the only imaginary frequencies of each transition state

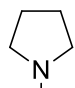

1. **1a** Charge = 0 Multiplicity = 1

| Center Number | Atomic Number | Atomic Type | Coordinates (Angstroms) |           |           |
|---------------|---------------|-------------|-------------------------|-----------|-----------|
|               |               |             | X                       | Y         | Z         |
| 1             | 6             | 0           | 3.057676                | -0.692708 | -0.326634 |
| 2             | 6             | 0           | 1.650060                | -1.213893 | -0.028405 |
| 3             | 6             | 0           | 1.650061                | 1.213775  | 0.028680  |
| 4             | 6             | 0           | 3.057988                | 0.692738  | 0.325543  |
| 5             | 1             | 0           | 3.837445                | -1.353590 | 0.058448  |
| 6             | 1             | 0           | 3.191612                | -0.595437 | -1.409341 |
| 7             | 1             | 0           | 1.611204                | -1.741980 | 0.936662  |
| 8             | 1             | 0           | 1.290653                | -1.904126 | -0.800714 |
| 9             | 1             | 0           | 1.610056                | 1.741083  | -0.936789 |
| 10            | 1             | 0           | 1.291596                | 1.904632  | 0.800858  |
| 11            | 1             | 0           | 3.837321                | 1.353651  | -0.060364 |
| 12            | 1             | 0           | 3.193001                | 0.595523  | 1.408122  |
| 13            | 7             | 0           | 0.844753                | -0.000064 | 0.001147  |
| 14            | 6             | 0           | -0.525146               | -0.000014 | 0.000554  |
| 15            | 6             | 0           | -1.253160               | -1.205252 | 0.100386  |
| 16            | 6             | 0           | -1.252987               | 1.205255  | -0.099831 |
| 17            | 6             | 0           | -2.642613               | -1.193935 | 0.097398  |
| 18            | 1             | 0           | -0.725663               | -2.148795 | 0.191682  |
| 19            | 6             | 0           | -2.642460               | 1.194030  | -0.097880 |
| 20            | 1             | 0           | -0.725378               | 2.148777  | -0.190710 |
| 21            | 6             | 0           | -3.355424               | 0.000081  | -0.000506 |
| 22            | 1             | 0           | -3.174462               | -2.138338 | 0.177737  |
| 23            | 1             | 0           | -3.174161               | 2.138477  | -0.178679 |
| 24            | 1             | 0           | -4.440469               | 0.000119  | -0.000778 |

0 imaginary frequencies

Zero-point Energies= -443.241033

Thermal Energies= -443.231665

Thermal Enthalpies= -443.230721



Thermal Free Energies= -443.277302

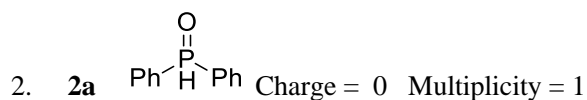

---

| Center<br>Number | Atomic<br>Number | Atomic<br>Type | Coordinates (Angstroms) |           |           |
|------------------|------------------|----------------|-------------------------|-----------|-----------|
|                  |                  |                | X                       | Y         | Z         |
| 1                | 15               | 0              | 0.001859                | 1.388039  | 0.329140  |
| 2                | 8                | 0              | 0.129950                | 2.592457  | -0.555273 |
| 3                | 1                | 0              | -0.120617               | 1.686606  | 1.701733  |
| 4                | 6                | 0              | -1.444578               | 0.334180  | 0.067861  |
| 5                | 6                | 0              | -1.503821               | -0.509175 | -1.047974 |
| 6                | 6                | 0              | -2.521234               | 0.390777  | 0.956316  |
| 7                | 6                | 0              | -2.634671               | -1.287024 | -1.270702 |
| 8                | 1                | 0              | -0.662811               | -0.559688 | -1.735890 |
| 9                | 6                | 0              | -3.651867               | -0.391985 | 0.732243  |
| 10               | 1                | 0              | -2.477739               | 1.045460  | 1.823663  |
| 11               | 6                | 0              | -3.707185               | -1.228544 | -0.379909 |
| 12               | 1                | 0              | -2.679787               | -1.942378 | -2.134979 |
| 13               | 1                | 0              | -4.486685               | -0.348975 | 1.424924  |
| 14               | 1                | 0              | -4.588082               | -1.839101 | -0.554260 |
| 15               | 6                | 0              | 1.431973                | 0.281134  | 0.217353  |
| 16               | 6                | 0              | 1.465380                | -0.944735 | 0.890220  |
| 17               | 6                | 0              | 2.521292                | 0.687435  | -0.554335 |
| 18               | 6                | 0              | 2.589598                | -1.757682 | 0.791010  |
| 19               | 1                | 0              | 0.613150                | -1.267096 | 1.484596  |
| 20               | 6                | 0              | 3.643754                | -0.132620 | -0.656121 |
| 21               | 1                | 0              | 2.478681                | 1.641412  | -1.072507 |
| 22               | 6                | 0              | 3.677410                | -1.351398 | 0.016774  |
| 23               | 1                | 0              | 2.617488                | -2.709410 | 1.312614  |
| 24               | 1                | 0              | 4.490180                | 0.180490  | -1.259677 |
| 25               | 1                | 0              | 4.552436                | -1.989736 | -0.061569 |

---

0 imaginary frequencies

Zero-point Energies= -880.037439

Thermal Energies= -880.025652

Thermal Enthalpies= -880.024708

Thermal Free Energies= -880.077481

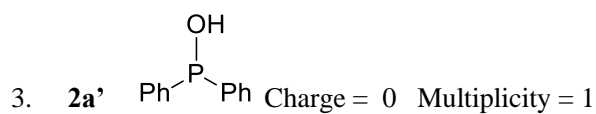

| -----  |        |        |                         |           |           |  |
|--------|--------|--------|-------------------------|-----------|-----------|--|
| Center | Atomic | Atomic | Coordinates (Angstroms) |           |           |  |
| Number | Number | Type   | X                       | Y         | Z         |  |
| -----  |        |        |                         |           |           |  |
| 1      | 15     | 0      | 0.021878                | 1.451119  | -0.594637 |  |
| 2      | 6      | 0      | 1.414339                | 0.325513  | -0.166424 |  |
| 3      | 6      | 0      | 1.367486                | -0.568599 | 0.911923  |  |
| 4      | 6      | 0      | 2.585085                | 0.414288  | -0.925160 |  |
| 5      | 6      | 0      | 2.472944                | -1.351615 | 1.226999  |  |
| 6      | 1      | 0      | 0.456645                | -0.660850 | 1.500269  |  |
| 7      | 6      | 0      | 3.691781                | -0.375972 | -0.615971 |  |
| 8      | 1      | 0      | 2.629816                | 1.105584  | -1.763423 |  |
| 9      | 6      | 0      | 3.635833                | -1.256293 | 0.460836  |  |
| 10     | 1      | 0      | 2.428432                | -2.041184 | 2.064821  |  |
| 11     | 1      | 0      | 4.594942                | -0.302763 | -1.214267 |  |
| 12     | 1      | 0      | 4.496698                | -1.871977 | 0.704358  |  |
| 13     | 6      | 0      | -1.398222               | 0.318970  | -0.294205 |  |
| 14     | 6      | 0      | -1.454909               | -0.927974 | -0.930425 |  |
| 15     | 6      | 0      | -2.477987               | 0.728667  | 0.493402  |  |
| 16     | 6      | 0      | -2.563366               | -1.752749 | -0.768826 |  |
| 17     | 1      | 0      | -0.622132               | -1.261156 | -1.546287 |  |
| 18     | 6      | 0      | -3.587020               | -0.100915 | 0.658011  |  |
| 19     | 1      | 0      | -2.452599               | 1.700230  | 0.979400  |  |
| 20     | 6      | 0      | -3.632047               | -1.341562 | 0.028437  |  |
| 21     | 1      | 0      | -2.592505               | -2.719945 | -1.261947 |  |
| 22     | 1      | 0      | -4.416801               | 0.226135  | 1.277900  |  |
| 23     | 1      | 0      | -4.496146               | -1.986750 | 0.155484  |  |
| 24     | 8      | 0      | -0.074358               | 2.431393  | 0.746573  |  |
| 25     | 1      | 0      | -0.083143               | 1.924193  | 1.579081  |  |

-----  
0 imaginary frequencies

Zero-point Energies= -880.032951

Thermal Energies= -880.020762

Thermal Enthalpies= -880.019817

Thermal Free Energies= -880.073029

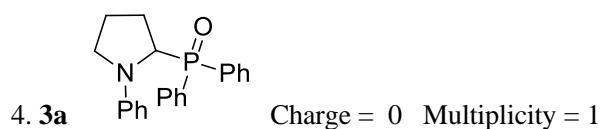

| Center Number | Atomic Number | Atomic Type | Coordinates (Angstroms) |           |           |
|---------------|---------------|-------------|-------------------------|-----------|-----------|
|               |               |             | X                       | Y         | Z         |
| 1             | 6             | 0           | 1.619465                | -1.428532 | -2.244215 |
| 2             | 6             | 0           | 0.383491                | -0.737395 | -1.625995 |
| 3             | 6             | 0           | 0.747658                | -2.872534 | -0.557529 |
| 4             | 6             | 0           | 1.384158                | -2.909451 | -1.945122 |
| 5             | 1             | 0           | 1.712872                | -1.197623 | -3.306239 |
| 6             | 1             | 0           | 2.537157                | -1.095835 | -1.745016 |
| 7             | 1             | 0           | -0.378163               | -0.564444 | -2.400744 |
| 8             | 1             | 0           | 1.513485                | -2.810772 | 0.229185  |
| 9             | 1             | 0           | 0.119397                | -3.745151 | -0.358291 |
| 10            | 1             | 0           | 2.303934                | -3.498199 | -1.973131 |
| 11            | 1             | 0           | 0.673435                | -3.333765 | -2.661850 |
| 12            | 7             | 0           | -0.076052               | -1.659845 | -0.597306 |
| 13            | 6             | 0           | -1.349094               | -1.634351 | -0.039956 |
| 14            | 6             | 0           | -2.390452               | -0.851294 | -0.570280 |
| 15            | 6             | 0           | -1.618217               | -2.404693 | 1.107437  |
| 16            | 6             | 0           | -3.641678               | -0.836832 | 0.034453  |
| 17            | 1             | 0           | -2.220960               | -0.236849 | -1.446681 |
| 18            | 6             | 0           | -2.878884               | -2.388345 | 1.695138  |
| 19            | 1             | 0           | -0.826582               | -3.003875 | 1.547590  |
| 20            | 6             | 0           | -3.902052               | -1.602940 | 1.169771  |
| 21            | 1             | 0           | -4.423290               | -0.216242 | -0.395362 |
| 22            | 1             | 0           | -3.054964               | -2.991208 | 2.581707  |
| 23            | 1             | 0           | -4.881693               | -1.585349 | 1.636178  |
| 24            | 15            | 0           | 0.895998                | 0.931071  | -0.998309 |
| 25            | 8             | 0           | 1.514447                | 1.738150  | -2.106982 |
| 26            | 6             | 0           | 2.060116                | 0.615034  | 0.363675  |
| 27            | 6             | 0           | 1.805614                | -0.233301 | 1.451475  |
| 28            | 6             | 0           | 3.297611                | 1.259156  | 0.266974  |
| 29            | 6             | 0           | 2.780204                | -0.422881 | 2.427545  |
| 30            | 1             | 0           | 0.851966                | -0.746751 | 1.536022  |

|    |   |   |           |           |           |
|----|---|---|-----------|-----------|-----------|
| 31 | 6 | 0 | 4.268584  | 1.067412  | 1.247557  |
| 32 | 1 | 0 | 3.490145  | 1.904898  | -0.585281 |
| 33 | 6 | 0 | 4.010208  | 0.226700  | 2.327119  |
| 34 | 1 | 0 | 2.577686  | -1.079391 | 3.268412  |
| 35 | 1 | 0 | 5.226269  | 1.572310  | 1.165730  |
| 36 | 1 | 0 | 4.766646  | 0.075273  | 3.091463  |
| 37 | 6 | 0 | -0.572688 | 1.746912  | -0.309105 |
| 38 | 6 | 0 | -1.381130 | 2.425253  | -1.229292 |
| 39 | 6 | 0 | -0.952472 | 1.689253  | 1.033972  |
| 40 | 6 | 0 | -2.575285 | 3.007376  | -0.815683 |
| 41 | 1 | 0 | -1.068489 | 2.496043  | -2.268099 |
| 42 | 6 | 0 | -2.146459 | 2.275493  | 1.445741  |
| 43 | 1 | 0 | -0.325351 | 1.187174  | 1.763745  |
| 44 | 6 | 0 | -2.962053 | 2.924961  | 0.521555  |
| 45 | 1 | 0 | -3.201083 | 3.528673  | -1.533751 |
| 46 | 1 | 0 | -2.440196 | 2.222318  | 2.489552  |
| 47 | 1 | 0 | -3.895286 | 3.376408  | 0.845100  |

-----  
0 imaginary frequencies

Zero-point Energies= -1322.126339  
Thermal Energies= -1322.105252  
Thermal Enthalpies= -1322.104308  
Thermal Free Energies= -1322.176938

5. **PFNB**  Charge = 0 Multiplicity = 1

-----

| Center<br>Number | Atomic<br>Number | Atomic<br>Type | Coordinates (Angstroms) |           |           |
|------------------|------------------|----------------|-------------------------|-----------|-----------|
|                  |                  |                | X                       | Y         | Z         |
| 1                | 6                | 0              | 1.167423                | 1.203483  | 0.039218  |
| 2                | 6                | 0              | -0.219208               | 1.207224  | 0.029917  |
| 3                | 6                | 0              | -0.916877               | -0.000106 | -0.000010 |
| 4                | 6                | 0              | -0.218884               | -1.207489 | -0.029949 |
| 5                | 6                | 0              | 1.167538                | -1.203326 | -0.039122 |
| 6                | 6                | 0              | 1.858751                | 0.000235  | 0.000109  |
| 7                | 7                | 0              | -2.374508               | -0.000166 | 0.000087  |
| 8                | 8                | 0              | -2.928696               | -0.894509 | 0.608174  |

|    |   |   |           |           |           |
|----|---|---|-----------|-----------|-----------|
| 9  | 8 | 0 | -2.928787 | 0.894184  | -0.607967 |
| 10 | 9 | 0 | -0.843398 | -2.370989 | -0.092119 |
| 11 | 9 | 0 | 1.833974  | -2.349301 | -0.089386 |
| 12 | 9 | 0 | 3.181019  | 0.000076  | 0.000094  |
| 13 | 9 | 0 | 1.833116  | 2.349885  | 0.089335  |
| 14 | 9 | 0 | -0.843715 | 2.370734  | 0.091715  |

-----  
0 imaginary frequencies

Zero-point Energies= -932.475791

Thermal Energies= -932.464512

Thermal Enthalpies= -932.463568

Thermal Free Energies= -932.513456

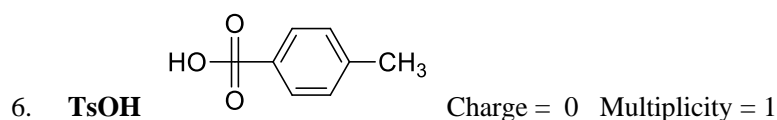

-----

| Center Number | Atomic Number | Atomic Type | Coordinates (Angstroms) |           |           |
|---------------|---------------|-------------|-------------------------|-----------|-----------|
|               |               |             | X                       | Y         | Z         |
| 1             | 16            | 0           | 1.889581                | 0.004368  | -0.121819 |
| 2             | 8             | 0           | 2.347490                | -1.174902 | -0.824288 |
| 3             | 8             | 0           | 2.358532                | 1.329196  | -0.487989 |
| 4             | 8             | 0           | 2.303020                | -0.254022 | 1.417337  |
| 5             | 1             | 0           | 2.336897                | 0.600384  | 1.893533  |
| 6             | 6             | 0           | 0.124317                | 0.009068  | -0.081595 |
| 7             | 6             | 0           | -0.551497               | -1.210252 | -0.041470 |
| 8             | 6             | 0           | -1.937597               | -1.199963 | 0.010647  |
| 9             | 6             | 0           | -2.652212               | 0.006015  | 0.019382  |
| 10            | 6             | 0           | -1.944551               | 1.209701  | -0.025429 |
| 11            | 6             | 0           | -0.553644               | 1.222847  | -0.076158 |
| 12            | 1             | 0           | 0.000830                | -2.144640 | -0.059218 |
| 13            | 1             | 0           | -2.479464               | -2.141443 | 0.040126  |
| 14            | 1             | 0           | -2.488178               | 2.150065  | -0.025134 |
| 15            | 1             | 0           | -0.004011               | 2.157496  | -0.122190 |
| 16            | 6             | 0           | -4.156407               | -0.009404 | 0.058923  |
| 17            | 1             | 0           | -4.561174               | 0.996473  | 0.193176  |
| 18            | 1             | 0           | -4.561656               | -0.417590 | -0.873383 |
| 19            | 1             | 0           | -4.519328               | -0.640869 | 0.875906  |

-----  
0 imaginary frequencies

Zero-point Energies= -894.989151

Thermal Energies= -894.978622

Thermal Enthalpies= -894.977678

Thermal Free Energies= -895.026461

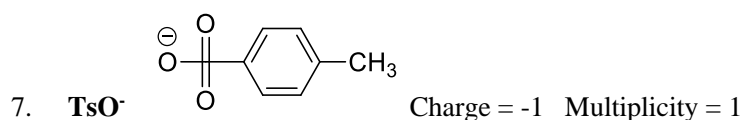

-----  
Center Atomic Atomic Coordinates (Angstroms)  
Number Number Type X Y Z  
-----

|    |    |   |           |           |           |
|----|----|---|-----------|-----------|-----------|
| 1  | 16 | 0 | 1.963622  | -0.001054 | 0.005372  |
| 2  | 8  | 0 | 2.352821  | -1.237483 | -0.704496 |
| 3  | 8  | 0 | 2.358134  | 1.241821  | -0.689830 |
| 4  | 8  | 0 | 2.315140  | -0.010729 | 1.441659  |
| 5  | 6  | 0 | 0.166873  | 0.002593  | -0.036328 |
| 6  | 6  | 0 | -0.532102 | -1.203228 | -0.026672 |
| 7  | 6  | 0 | -1.922262 | -1.197326 | -0.002817 |
| 8  | 6  | 0 | -2.638111 | 0.005593  | 0.010010  |
| 9  | 6  | 0 | -1.921508 | 1.204303  | -0.002502 |
| 10 | 6  | 0 | -0.528214 | 1.207268  | -0.026795 |
| 11 | 1  | 0 | 0.021529  | -2.137229 | -0.051881 |
| 12 | 1  | 0 | -2.465369 | -2.140127 | 0.000465  |
| 13 | 1  | 0 | -2.461690 | 2.148223  | 0.001564  |
| 14 | 1  | 0 | 0.026426  | 2.140665  | -0.051357 |
| 15 | 6  | 0 | -4.145538 | -0.004197 | 0.016653  |
| 16 | 1  | 0 | -4.548382 | 1.002809  | 0.155615  |
| 17 | 1  | 0 | -4.540280 | -0.396337 | -0.927580 |
| 18 | 1  | 0 | -4.533762 | -0.640058 | 0.819273  |

-----  
0 imaginary frequencies

Zero-point Energies= -894.540139

Thermal Energies= -894.530240

Thermal Enthalpies= -894.529296

Thermal Free Energies= -894.577049

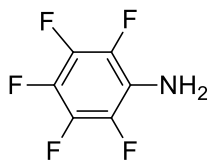

8. **Ar-NH<sub>2</sub>** Charge = 0 Multiplicity = 1

| Center Number | Atomic Number | Atomic Type | Coordinates (Angstroms) |           |           |
|---------------|---------------|-------------|-------------------------|-----------|-----------|
|               |               |             | X                       | Y         | Z         |
| 1             | 6             | 0           | -0.447273               | 1.318674  | 0.000074  |
| 2             | 6             | 0           | 0.904535                | 1.012844  | 0.000033  |
| 3             | 6             | 0           | 1.371867                | -0.301365 | 0.000004  |
| 4             | 6             | 0           | 0.413981                | -1.313588 | -0.000032 |
| 5             | 6             | 0           | -0.945992               | -1.029715 | -0.000052 |
| 6             | 6             | 0           | -1.376705               | 0.288058  | 0.000013  |
| 7             | 9             | 0           | 0.786691                | -2.590872 | -0.000074 |
| 8             | 9             | 0           | -1.839791               | -2.018073 | -0.000098 |
| 9             | 9             | 0           | -2.678022               | 0.564048  | 0.000024  |
| 10            | 9             | 0           | -0.858414               | 2.586313  | 0.000132  |
| 11            | 9             | 0           | 1.786866                | 2.014896  | 0.000079  |
| 12            | 7             | 0           | 2.755112                | -0.630942 | 0.000063  |
| 13            | 1             | 0           | 3.207678                | -0.220953 | -0.816059 |
| 14            | 1             | 0           | 3.208091                | -0.218710 | 0.814822  |

0 imaginary frequencies

Zero-point Energies= -783.383282

Thermal Energies= -783.373571

Thermal Enthalpies= -783.372627

Thermal Free Energies= -783.418341

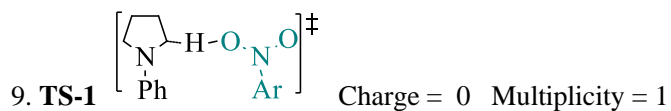

| Center Number | Atomic Number | Atomic Type | Coordinates (Angstroms) |          |          |
|---------------|---------------|-------------|-------------------------|----------|----------|
|               |               |             | X                       | Y        | Z        |
| 1             | 6             | 0           | 1.719107                | 2.792358 | 1.399264 |
| 2             | 6             | 0           | 1.643787                | 1.353065 | 0.960501 |
| 3             | 6             | 0           | 3.798227                | 2.084393 | 0.417625 |

|    |   |   |           |           |           |
|----|---|---|-----------|-----------|-----------|
| 4  | 6 | 0 | 2.888063  | 3.308069  | 0.551551  |
| 5  | 1 | 0 | 0.785693  | 3.335747  | 1.241571  |
| 6  | 1 | 0 | 1.958007  | 2.825755  | 2.471650  |
| 7  | 1 | 0 | 0.747850  | 1.573321  | -0.321871 |
| 8  | 1 | 0 | 0.976223  | 0.628557  | 1.420233  |
| 9  | 1 | 0 | 4.550520  | 2.031282  | 1.212743  |
| 10 | 1 | 0 | 4.299126  | 2.023767  | -0.550553 |
| 11 | 1 | 0 | 3.406207  | 4.155383  | 1.002183  |
| 12 | 1 | 0 | 2.522968  | 3.604656  | -0.435978 |
| 13 | 7 | 0 | 2.869406  | 0.946099  | 0.575000  |
| 14 | 6 | 0 | 3.240321  | -0.366259 | 0.279505  |
| 15 | 6 | 0 | 2.285445  | -1.394178 | 0.292971  |
| 16 | 6 | 0 | 4.578362  | -0.660110 | -0.037834 |
| 17 | 6 | 0 | 2.674749  | -2.695514 | -0.012240 |
| 18 | 1 | 0 | 1.248437  | -1.190159 | 0.509427  |
| 19 | 6 | 0 | 4.946263  | -1.963939 | -0.330952 |
| 20 | 1 | 0 | 5.328397  | 0.122846  | -0.045825 |
| 21 | 6 | 0 | 3.997403  | -2.989573 | -0.322812 |
| 22 | 1 | 0 | 1.924199  | -3.480130 | -0.010454 |
| 23 | 1 | 0 | 5.982848  | -2.181556 | -0.568860 |
| 24 | 1 | 0 | 4.292026  | -4.007451 | -0.557436 |
| 25 | 6 | 0 | -2.980319 | -1.522263 | 0.415880  |
| 26 | 6 | 0 | -1.771845 | -1.165010 | -0.170623 |
| 27 | 6 | 0 | -1.574746 | 0.120870  | -0.692727 |
| 28 | 6 | 0 | -2.659406 | 1.010804  | -0.622327 |
| 29 | 6 | 0 | -3.855576 | 0.657615  | -0.024845 |
| 30 | 6 | 0 | -4.026740 | -0.619756 | 0.491419  |
| 31 | 7 | 0 | -0.411799 | 0.507007  | -1.403039 |
| 32 | 8 | 0 | 0.018828  | 1.740953  | -1.095065 |
| 33 | 8 | 0 | 0.515196  | -0.359687 | -1.602859 |
| 34 | 9 | 0 | -2.572376 | 2.228114  | -1.153509 |
| 35 | 9 | 0 | -4.858124 | 1.533263  | 0.028237  |
| 36 | 9 | 0 | -5.178002 | -0.966449 | 1.060880  |
| 37 | 9 | 0 | -3.123389 | -2.743533 | 0.929726  |
| 38 | 9 | 0 | -0.814387 | -2.092208 | -0.149036 |

-----  
1 imaginary frequencies (748.85  $\text{icm}^{-1}$ )

Zero-point Energies= -1375.650435



Thermal Energies= -1375.628637  
 Thermal Enthalpies= -1375.627693  
 Thermal Free Energies= -1375.704167

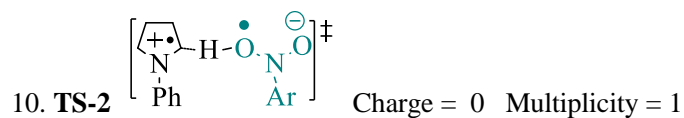

| Center Number | Atomic Number | Atomic Type | Coordinates (Angstroms) |           |           |
|---------------|---------------|-------------|-------------------------|-----------|-----------|
|               |               |             | X                       | Y         | Z         |
| 1             | 6             | 0           | 1.960814                | 2.968186  | 1.455190  |
| 2             | 6             | 0           | 1.732276                | 1.514196  | 1.099090  |
| 3             | 6             | 0           | 3.889127                | 2.099977  | 0.316064  |
| 4             | 6             | 0           | 3.041023                | 3.367677  | 0.442573  |
| 5             | 1             | 0           | 1.051675                | 3.569319  | 1.374490  |
| 6             | 1             | 0           | 2.336814                | 3.054589  | 2.483827  |
| 7             | 1             | 0           | 0.768072                | 1.622398  | 0.003151  |
| 8             | 1             | 0           | 1.199656                | 0.856337  | 1.788479  |
| 9             | 1             | 0           | 4.697505                | 2.072081  | 1.058124  |
| 10            | 1             | 0           | 4.322948                | 1.965738  | -0.678381 |
| 11            | 1             | 0           | 3.633141                | 4.229513  | 0.754943  |
| 12            | 1             | 0           | 2.574758                | 3.593055  | -0.521521 |
| 13            | 7             | 0           | 2.930710                | 1.024256  | 0.604783  |
| 14            | 6             | 0           | 3.196601                | -0.312021 | 0.326625  |
| 15            | 6             | 0           | 2.166649                | -1.265872 | 0.356679  |
| 16            | 6             | 0           | 4.502047                | -0.723072 | 0.008540  |
| 17            | 6             | 0           | 2.445564                | -2.599560 | 0.084778  |
| 18            | 1             | 0           | 1.147972                | -0.965782 | 0.566978  |
| 19            | 6             | 0           | 4.763076                | -2.060501 | -0.260895 |
| 20            | 1             | 0           | 5.311925                | -0.002100 | -0.014232 |
| 21            | 6             | 0           | 3.741015                | -3.008345 | -0.223656 |
| 22            | 1             | 0           | 1.633355                | -3.320087 | 0.101510  |
| 23            | 1             | 0           | 5.778144                | -2.362689 | -0.500751 |
| 24            | 1             | 0           | 3.951173                | -4.050836 | -0.439793 |
| 25            | 6             | 0           | -2.927211               | -1.747125 | 0.114991  |
| 26            | 6             | 0           | -1.732883               | -1.253395 | -0.390416 |
| 27            | 6             | 0           | -1.591555               | 0.104479  | -0.696471 |
| 28            | 6             | 0           | -2.693508               | 0.943364  | -0.490638 |

|    |   |   |           |           |           |
|----|---|---|-----------|-----------|-----------|
| 29 | 6 | 0 | -3.880269 | 0.450379  | 0.026037  |
| 30 | 6 | 0 | -4.003808 | -0.899433 | 0.323570  |
| 31 | 7 | 0 | -0.402151 | 0.622499  | -1.257887 |
| 32 | 8 | 0 | -0.012313 | 1.817066  | -0.804940 |
| 33 | 8 | 0 | 0.420255  | -0.128609 | -1.834378 |
| 34 | 9 | 0 | -2.640311 | 2.230801  | -0.810246 |
| 35 | 9 | 0 | -4.914553 | 1.266611  | 0.209754  |
| 36 | 9 | 0 | -5.143680 | -1.374139 | 0.812069  |
| 37 | 9 | 0 | -3.031731 | -3.038034 | 0.419447  |
| 38 | 9 | 0 | -0.724098 | -2.109860 | -0.519702 |

-----  
 1 imaginary frequencies (708.14  $\text{icm}^{-1}$ )

Zero-point Energies= -1375.670631  
 Thermal Energies= -1375.648723  
 Thermal Enthalpies= -1375.647779  
 Thermal Free Energies= -1375.723559

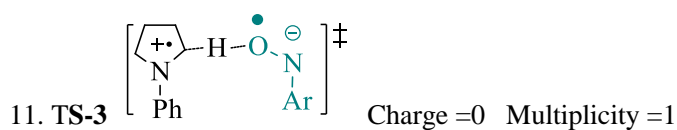

-----

| Center Number | Atomic Number | Atomic Type | Coordinates (Angstroms) |           |           |
|---------------|---------------|-------------|-------------------------|-----------|-----------|
|               |               |             | X                       | Y         | Z         |
| 1             | 6             | 0           | -0.822236               | 2.367766  | -0.822231 |
| 2             | 6             | 0           | -1.355121               | 1.021398  | -0.412570 |
| 3             | 6             | 0           | -3.223634               | 2.422043  | -0.663532 |
| 4             | 6             | 0           | -1.986697               | 3.298347  | -0.454870 |
| 5             | 1             | 0           | 0.114222                | 2.620262  | -0.321651 |
| 6             | 1             | 0           | -0.638435               | 2.365119  | -1.905669 |
| 7             | 1             | 0           | -0.815606               | 0.686318  | 0.970205  |
| 8             | 1             | 0           | -0.873356               | 0.073280  | -0.694291 |
| 9             | 1             | 0           | -3.605437               | 2.480938  | -1.689868 |
| 10            | 1             | 0           | -4.038587               | 2.638997  | 0.030339  |
| 11            | 1             | 0           | -2.019160               | 4.204342  | -1.061312 |
| 12            | 1             | 0           | -1.912200               | 3.584408  | 0.598056  |
| 13            | 7             | 0           | -2.707547               | 1.061910  | -0.426348 |
| 14            | 6             | 0           | -3.543771               | -0.048197 | -0.234259 |
| 15            | 6             | 0           | -3.022697               | -1.243458 | 0.283528  |

|    |   |   |           |           |           |
|----|---|---|-----------|-----------|-----------|
| 16 | 6 | 0 | -4.903580 | 0.041707  | -0.559620 |
| 17 | 6 | 0 | -3.864221 | -2.337222 | 0.450438  |
| 18 | 1 | 0 | -1.977659 | -1.320307 | 0.569897  |
| 19 | 6 | 0 | -5.729668 | -1.061154 | -0.377587 |
| 20 | 1 | 0 | -5.311286 | 0.960684  | -0.966452 |
| 21 | 6 | 0 | -5.216826 | -2.255393 | 0.124830  |
| 22 | 1 | 0 | -3.454623 | -3.258321 | 0.853168  |
| 23 | 1 | 0 | -6.781383 | -0.983772 | -0.635472 |
| 24 | 1 | 0 | -5.866630 | -3.112851 | 0.266856  |
| 25 | 6 | 0 | 3.600323  | -1.450328 | -0.418669 |
| 26 | 6 | 0 | 2.327032  | -1.633616 | 0.077530  |
| 27 | 6 | 0 | 1.576864  | -0.594309 | 0.676602  |
| 28 | 6 | 0 | 2.221225  | 0.661044  | 0.735845  |
| 29 | 6 | 0 | 3.499652  | 0.849525  | 0.229610  |
| 30 | 6 | 0 | 4.201197  | -0.197922 | -0.344438 |
| 31 | 7 | 0 | 0.319166  | -0.943868 | 1.120356  |
| 32 | 8 | 0 | -0.303509 | 0.079966  | 1.723688  |
| 33 | 9 | 0 | 1.631493  | 1.747130  | 1.253632  |
| 34 | 9 | 0 | 4.061820  | 2.057804  | 0.299499  |
| 35 | 9 | 0 | 5.429313  | -0.008613 | -0.825401 |
| 36 | 9 | 0 | 4.259740  | -2.467535 | -0.974647 |
| 37 | 9 | 0 | 1.781023  | -2.847617 | -0.019526 |

-----  
 1 imaginary frequencies (539.37  $\text{icm}^{-1}$ )

Zero-point Energies= -1300.510683

Thermal Energies= -1300.489607

Thermal Enthalpies= -1300.488663

Thermal Free Energies= -1300.563109

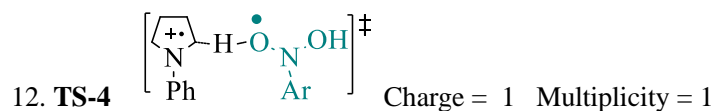

-----

| Center<br>Number | Atomic<br>Number | Atomic<br>Type | Coordinates (Angstroms) |          |           |
|------------------|------------------|----------------|-------------------------|----------|-----------|
|                  |                  |                | X                       | Y        | Z         |
| 1                | 6                | 0              | 1.185426                | 2.336322 | 1.176000  |
| 2                | 6                | 0              | 1.749634                | 0.941705 | 0.998173  |
| 3                | 6                | 0              | 3.139630                | 2.412098 | -0.208946 |

|    |   |   |           |           |           |
|----|---|---|-----------|-----------|-----------|
| 4  | 6 | 0 | 1.763447  | 3.057137  | -0.045484 |
| 5  | 1 | 0 | 0.096682  | 2.352018  | 1.221100  |
| 6  | 1 | 0 | 1.577220  | 2.753581  | 2.112034  |
| 7  | 1 | 0 | 0.957886  | 0.338197  | 0.107666  |
| 8  | 1 | 0 | 1.715965  | 0.204824  | 1.802050  |
| 9  | 1 | 0 | 3.904009  | 2.911536  | 0.398012  |
| 10 | 1 | 0 | 3.489283  | 2.342038  | -1.240482 |
| 11 | 1 | 0 | 1.835679  | 4.136925  | 0.085969  |
| 12 | 1 | 0 | 1.147844  | 2.847686  | -0.925249 |
| 13 | 7 | 0 | 2.944767  | 1.054722  | 0.344181  |
| 14 | 6 | 0 | 3.868992  | 0.022491  | 0.162803  |
| 15 | 6 | 0 | 3.499514  | -1.310414 | 0.407909  |
| 16 | 6 | 0 | 5.168884  | 0.329042  | -0.268477 |
| 17 | 6 | 0 | 4.436033  | -2.318726 | 0.236970  |
| 18 | 1 | 0 | 2.481785  | -1.564132 | 0.683784  |
| 19 | 6 | 0 | 6.093769  | -0.693357 | -0.426782 |
| 20 | 1 | 0 | 5.459971  | 1.356849  | -0.454595 |
| 21 | 6 | 0 | 5.734971  | -2.016623 | -0.173284 |
| 22 | 1 | 0 | 4.146067  | -3.348993 | 0.414529  |
| 23 | 1 | 0 | 7.101820  | -0.453342 | -0.747948 |
| 24 | 1 | 0 | 6.462166  | -2.811403 | -0.302525 |
| 25 | 6 | 0 | -4.162769 | -1.073523 | 0.143039  |
| 26 | 6 | 0 | -2.863657 | -1.515863 | -0.041888 |
| 27 | 6 | 0 | -1.820596 | -0.609083 | -0.298223 |
| 28 | 6 | 0 | -2.149176 | 0.753153  | -0.392402 |
| 29 | 6 | 0 | -3.452665 | 1.186567  | -0.211872 |
| 30 | 6 | 0 | -4.466242 | 0.277458  | 0.052702  |
| 31 | 7 | 0 | -0.516953 | -1.062179 | -0.544193 |
| 32 | 8 | 0 | 0.428836  | -0.272786 | -0.871064 |
| 33 | 9 | 0 | -1.228521 | 1.684377  | -0.625732 |
| 34 | 9 | 0 | -3.724338 | 2.482298  | -0.286980 |
| 35 | 9 | 0 | -5.708290 | 0.694711  | 0.228679  |
| 36 | 9 | 0 | -5.123056 | -1.952714 | 0.392228  |
| 37 | 9 | 0 | -2.644653 | -2.823262 | 0.030288  |
| 38 | 8 | 0 | -0.119202 | -2.254656 | -0.005579 |
| 39 | 1 | 0 | -0.339603 | -2.233047 | 0.951095  |

-----  
1 imaginary frequencies (1996.98  $\text{icm}^{-1}$ )

Zero-point Energies= -1376.074035  
 Thermal Energies= -1376.051874  
 Thermal Enthalpies= -1376.050930  
 Thermal Free Energies= -1376.127030

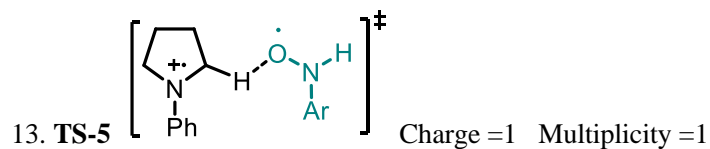

| Center Number | Atomic Number | Atomic Type | Coordinates (Angstroms) |           |           |
|---------------|---------------|-------------|-------------------------|-----------|-----------|
|               |               |             | X                       | Y         | Z         |
| 1             | 6             | 0           | -0.995978               | 2.394990  | -1.829950 |
| 2             | 6             | 0           | -1.605988               | 1.061897  | -1.446078 |
| 3             | 6             | 0           | -3.304765               | 2.690017  | -1.252184 |
| 4             | 6             | 0           | -1.945314               | 3.380022  | -1.139979 |
| 5             | 1             | 0           | 0.040287                | 2.490891  | -1.503950 |
| 6             | 1             | 0           | -1.029083               | 2.500603  | -2.921127 |
| 7             | 1             | 0           | -1.152095               | 0.783412  | -0.253825 |
| 8             | 1             | 0           | -1.325384               | 0.139232  | -1.960591 |
| 9             | 1             | 0           | -3.805747               | 2.915460  | -2.201369 |
| 10            | 1             | 0           | -3.988449               | 2.897611  | -0.427450 |
| 11            | 1             | 0           | -1.952072               | 4.367797  | -1.601244 |
| 12            | 1             | 0           | -1.668061               | 3.482811  | -0.086214 |
| 13            | 7             | 0           | -2.951836               | 1.255314  | -1.261879 |
| 14            | 6             | 0           | -3.878282               | 0.239938  | -1.031852 |
| 15            | 6             | 0           | -3.435783               | -1.060980 | -0.736963 |
| 16            | 6             | 0           | -5.251803               | 0.523894  | -1.087759 |
| 17            | 6             | 0           | -4.366098               | -2.065553 | -0.519779 |
| 18            | 1             | 0           | -2.375620               | -1.275596 | -0.652836 |
| 19            | 6             | 0           | -6.167936               | -0.495235 | -0.869540 |
| 20            | 1             | 0           | -5.598817               | 1.524423  | -1.319943 |
| 21            | 6             | 0           | -5.732523               | -1.789821 | -0.588326 |
| 22            | 1             | 0           | -4.023975               | -3.068649 | -0.287449 |
| 23            | 1             | 0           | -7.229186               | -0.276215 | -0.922353 |
| 24            | 1             | 0           | -6.454853               | -2.580919 | -0.416833 |
| 25            | 6             | 0           | 3.666852                | -1.046038 | 0.664952  |
| 26            | 6             | 0           | 2.309131                | -1.234094 | 0.826663  |

|    |   |   |           |           |          |
|----|---|---|-----------|-----------|----------|
| 27 | 6 | 0 | 1.412043  | -0.157026 | 0.825566 |
| 28 | 6 | 0 | 1.929316  | 1.132890  | 0.652874 |
| 29 | 6 | 0 | 3.292739  | 1.322272  | 0.481553 |
| 30 | 6 | 0 | 4.164165  | 0.241800  | 0.491467 |
| 31 | 7 | 0 | 0.071462  | -0.432606 | 1.008759 |
| 32 | 8 | 0 | -0.841284 | 0.475291  | 0.944192 |
| 33 | 9 | 0 | 1.140901  | 2.204765  | 0.634979 |
| 34 | 9 | 0 | 3.766034  | 2.550289  | 0.312216 |
| 35 | 9 | 0 | 5.464018  | 0.434785  | 0.330573 |
| 36 | 9 | 0 | 4.492092  | -2.083917 | 0.667919 |
| 37 | 9 | 0 | 1.821360  | -2.465118 | 0.983576 |
| 38 | 1 | 0 | -0.236869 | -1.401559 | 1.089449 |

-----  
 1 imaginary frequencies (1846.81  $\text{icm}^{-1}$ )

Zero-point Energies= -1300.941879

Thermal Energies= -1300.921691

Thermal Enthalpies= -1300.920747

Thermal Free Energies= -1300.991208

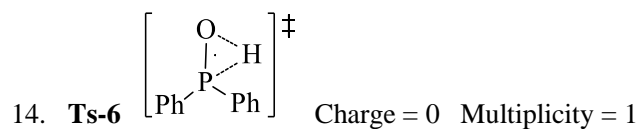

-----  
 Center Atomic Atomic Coordinates (Angstroms)  
 Number Number Type X Y Z

|    |    |   |           |           |           |
|----|----|---|-----------|-----------|-----------|
| 1  | 15 | 0 | 0.020038  | 1.352561  | -0.374053 |
| 2  | 8  | 0 | -0.102205 | 2.564610  | 0.661836  |
| 3  | 1  | 0 | 0.110975  | 2.779874  | -0.745221 |
| 4  | 6  | 0 | 1.448530  | 0.268552  | -0.095119 |
| 5  | 6  | 0 | 1.395136  | -0.826954 | 0.776448  |
| 6  | 6  | 0 | 2.650896  | 0.585959  | -0.736403 |
| 7  | 6  | 0 | 2.536319  | -1.589981 | 1.003914  |
| 8  | 1  | 0 | 0.464470  | -1.081610 | 1.276649  |
| 9  | 6  | 0 | 3.790137  | -0.181059 | -0.508820 |
| 10 | 1  | 0 | 2.690876  | 1.432763  | -1.417314 |
| 11 | 6  | 0 | 3.731461  | -1.268011 | 0.361027  |
| 12 | 1  | 0 | 2.494045  | -2.436953 | 1.681903  |

|    |   |   |           |           |           |
|----|---|---|-----------|-----------|-----------|
| 13 | 1 | 0 | 4.719983  | 0.066636  | -1.011413 |
| 14 | 1 | 0 | 4.619111  | -1.867938 | 0.538294  |
| 15 | 6 | 0 | -1.430879 | 0.281205  | -0.234520 |
| 16 | 6 | 0 | -1.532345 | -0.925077 | -0.938880 |
| 17 | 6 | 0 | -2.482922 | 0.712975  | 0.575854  |
| 18 | 6 | 0 | -2.683701 | -1.695436 | -0.823871 |
| 19 | 1 | 0 | -0.710400 | -1.261847 | -1.566484 |
| 20 | 6 | 0 | -3.630888 | -0.068740 | 0.694344  |
| 21 | 1 | 0 | -2.388377 | 1.654342  | 1.110375  |
| 22 | 6 | 0 | -3.732149 | -1.267950 | -0.006392 |
| 23 | 1 | 0 | -2.764824 | -2.631636 | -1.367761 |
| 24 | 1 | 0 | -4.446622 | 0.261018  | 1.330619  |
| 25 | 1 | 0 | -4.629733 | -1.872835 | 0.080973  |

-----  
 1 imaginary frequencies (1881.73  $\text{icm}^{-1}$ )

Zero-point Energies= -879.935757

Thermal Energies= -879.923743

Thermal Enthalpies= -879.922798

Thermal Free Energies= -879.975680

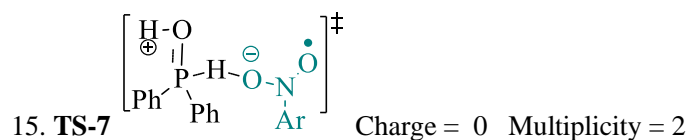

-----  
 Center Atomic Atomic Coordinates (Angstroms)  
 Number Number Type X Y Z

|    |    |   |           |           |           |
|----|----|---|-----------|-----------|-----------|
| 1  | 15 | 0 | -1.917666 | 0.799182  | 0.818949  |
| 2  | 1  | 0 | -1.316190 | -0.069175 | 1.880771  |
| 3  | 6  | 0 | -3.349218 | 0.059733  | 0.034325  |
| 4  | 6  | 0 | -4.109821 | 0.810583  | -0.870808 |
| 5  | 6  | 0 | -3.714452 | -1.248085 | 0.367251  |
| 6  | 6  | 0 | -5.241841 | 0.244409  | -1.443965 |
| 7  | 1  | 0 | -3.817387 | 1.827143  | -1.122230 |
| 8  | 6  | 0 | -4.849631 | -1.806102 | -0.215747 |
| 9  | 1  | 0 | -3.092133 | -1.823495 | 1.045883  |
| 10 | 6  | 0 | -5.609177 | -1.061820 | -1.115255 |
| 11 | 1  | 0 | -5.836691 | 0.817498  | -2.147975 |

|    |   |   |           |           |           |
|----|---|---|-----------|-----------|-----------|
| 12 | 1 | 0 | -5.137513 | -2.822800 | 0.031551  |
| 13 | 1 | 0 | -6.492984 | -1.501453 | -1.567741 |
| 14 | 6 | 0 | -0.704978 | 1.279875  | -0.416142 |
| 15 | 6 | 0 | 0.027014  | 2.459416  | -0.238910 |
| 16 | 6 | 0 | -0.396829 | 0.401076  | -1.460643 |
| 17 | 6 | 0 | 1.071596  | 2.755815  | -1.109565 |
| 18 | 1 | 0 | -0.212658 | 3.131894  | 0.578292  |
| 19 | 6 | 0 | 0.654577  | 0.703578  | -2.320721 |
| 20 | 1 | 0 | -0.950736 | -0.525925 | -1.577091 |
| 21 | 6 | 0 | 1.389065  | 1.875898  | -2.143586 |
| 22 | 1 | 0 | 1.643841  | 3.667902  | -0.972727 |
| 23 | 1 | 0 | 0.902380  | 0.020411  | -3.127062 |
| 24 | 1 | 0 | 2.213534  | 2.103389  | -2.812869 |
| 25 | 8 | 0 | -2.353220 | 2.240605  | 1.426815  |
| 26 | 1 | 0 | -2.717464 | 2.174228  | 2.328803  |
| 27 | 6 | 0 | 3.252383  | -1.405057 | -0.577013 |
| 28 | 6 | 0 | 2.058465  | -1.846207 | -0.031737 |
| 29 | 6 | 0 | 1.343582  | -1.061531 | 0.883856  |
| 30 | 6 | 0 | 1.886859  | 0.181528  | 1.234652  |
| 31 | 6 | 0 | 3.076856  | 0.624934  | 0.680056  |
| 32 | 6 | 0 | 3.768359  | -0.165563 | -0.225167 |
| 33 | 7 | 0 | 0.095571  | -1.493073 | 1.356242  |
| 34 | 8 | 0 | -0.332830 | -1.042381 | 2.508696  |
| 35 | 8 | 0 | -0.723760 | -2.012332 | 0.518327  |
| 36 | 9 | 0 | 1.231665  | 1.029164  | 2.030384  |
| 37 | 9 | 0 | 3.531207  | 1.841875  | 0.979263  |
| 38 | 9 | 0 | 4.909711  | 0.264973  | -0.760063 |
| 39 | 9 | 0 | 3.917348  | -2.178139 | -1.435495 |
| 40 | 9 | 0 | 1.618027  | -3.050968 | -0.384259 |

-----  
1 imaginary frequencies (367.50 cm<sup>-1</sup>)

Zero-point Energies= -1813.081062  
Thermal Energies= -1813.055807  
Thermal Enthalpies= -1813.054862  
Thermal Free Energies= -1813.138741



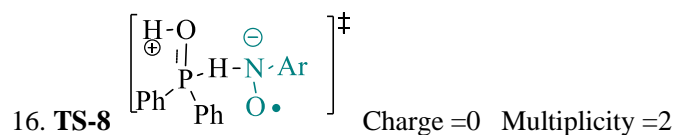

| Center Number | Atomic Number | Atomic Type | Coordinates (Angstroms) |           |           |
|---------------|---------------|-------------|-------------------------|-----------|-----------|
|               |               |             | X                       | Y         | Z         |
| 1             | 15            | 0           | -1.653578               | -0.379767 | 1.192538  |
| 2             | 1             | 0           | -0.807552               | -1.524163 | 0.812597  |
| 3             | 6             | 0           | -3.076612               | -0.316037 | 0.114850  |
| 4             | 6             | 0           | -4.098383               | 0.618959  | 0.325431  |
| 5             | 6             | 0           | -3.162360               | -1.253052 | -0.921034 |
| 6             | 6             | 0           | -5.205568               | 0.616793  | -0.514287 |
| 7             | 1             | 0           | -4.026161               | 1.339263  | 1.136491  |
| 8             | 6             | 0           | -4.275435               | -1.243736 | -1.756867 |
| 9             | 1             | 0           | -2.362197               | -1.972553 | -1.074391 |
| 10            | 6             | 0           | -5.290964               | -0.312316 | -1.552670 |
| 11            | 1             | 0           | -6.001810               | 1.337958  | -0.360949 |
| 12            | 1             | 0           | -4.348829               | -1.964554 | -2.564588 |
| 13            | 1             | 0           | -6.158083               | -0.308879 | -2.206113 |
| 14            | 6             | 0           | -0.689620               | 1.127641  | 1.134502  |
| 15            | 6             | 0           | 0.395208                | 1.230128  | 2.016085  |
| 16            | 6             | 0           | -0.908629               | 2.101557  | 0.157314  |
| 17            | 6             | 0           | 1.253524                | 2.318474  | 1.920385  |
| 18            | 1             | 0           | 0.569222                | 0.463079  | 2.766137  |
| 19            | 6             | 0           | -0.042602               | 3.188746  | 0.071467  |
| 20            | 1             | 0           | -1.734662               | 2.006038  | -0.541188 |
| 21            | 6             | 0           | 1.035530                | 3.294354  | 0.946684  |
| 22            | 1             | 0           | 2.096823                | 2.401425  | 2.598339  |
| 23            | 1             | 0           | -0.203757               | 3.944966  | -0.689869 |
| 24            | 1             | 0           | 1.714974                | 4.137365  | 0.867159  |
| 25            | 8             | 0           | -2.122933               | -0.445095 | 2.740437  |
| 26            | 1             | 0           | -2.473426               | -1.321734 | 2.991252  |
| 27            | 6             | 0           | 1.797522                | 0.554135  | -1.444252 |
| 28            | 6             | 0           | 0.975365                | -0.488433 | -1.071446 |
| 29            | 6             | 0           | 1.397351                | -1.576972 | -0.281196 |
| 30            | 6             | 0           | 2.761637                | -1.560124 | 0.078256  |
| 31            | 6             | 0           | 3.599096                | -0.519755 | -0.299351 |

|    |   |   |           |           |           |
|----|---|---|-----------|-----------|-----------|
| 32 | 6 | 0 | 3.132679  | 0.543634  | -1.058932 |
| 33 | 7 | 0 | 0.417720  | -2.489731 | 0.105610  |
| 34 | 8 | 0 | 0.847792  | -3.553582 | 0.694083  |
| 35 | 9 | 0 | 3.307286  | -2.516956 | 0.835160  |
| 36 | 9 | 0 | 4.880254  | -0.534390 | 0.082084  |
| 37 | 9 | 0 | 3.948859  | 1.542820  | -1.406944 |
| 38 | 9 | 0 | 1.321773  | 1.560625  | -2.182731 |
| 39 | 9 | 0 | -0.321529 | -0.426336 | -1.441793 |

-----  
 1 imaginary frequencies (79.18  $\text{icm}^{-1}$ )

Zero-point Energies= -1737.915530

Thermal Energies= -1737.890999

Thermal Enthalpies= -1737.890055

Thermal Free Energies= -1737.973212

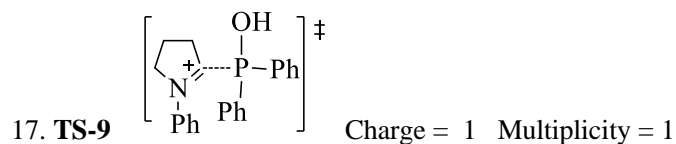

-----  
 Center Atomic Atomic Coordinates (Angstroms)  
 Number Number Type X Y Z

|    |   |   |           |           |           |
|----|---|---|-----------|-----------|-----------|
| 1  | 6 | 0 | -0.206827 | -2.983663 | -1.516852 |
| 2  | 6 | 0 | -1.674210 | -2.541463 | -1.508406 |
| 3  | 6 | 0 | -0.760997 | -2.059601 | 0.571532  |
| 4  | 6 | 0 | 0.149514  | -3.082021 | -0.028892 |
| 5  | 1 | 0 | -0.065089 | -3.922037 | -2.052855 |
| 6  | 1 | 0 | 0.410555  | -2.213315 | -1.988886 |
| 7  | 1 | 0 | -2.374560 | -3.381491 | -1.538608 |
| 8  | 1 | 0 | -1.925009 | -1.835118 | -2.302199 |
| 9  | 1 | 0 | -0.798100 | -1.803529 | 1.626736  |
| 10 | 1 | 0 | 1.203002  | -2.909025 | 0.199251  |
| 11 | 1 | 0 | -0.133361 | -4.054321 | 0.397385  |
| 12 | 7 | 0 | -1.809565 | -1.868010 | -0.192244 |
| 13 | 6 | 0 | -2.888054 | -0.995300 | 0.106622  |
| 14 | 6 | 0 | -4.046637 | -1.051328 | -0.671767 |
| 15 | 6 | 0 | -2.772954 | -0.064192 | 1.144668  |
| 16 | 6 | 0 | -5.095005 | -0.178894 | -0.400212 |
| 17 | 1 | 0 | -4.138012 | -1.774945 | -1.474471 |

|    |    |   |           |           |           |
|----|----|---|-----------|-----------|-----------|
| 18 | 6  | 0 | -3.831345 | 0.801290  | 1.401647  |
| 19 | 1  | 0 | -1.871221 | 0.004763  | 1.746037  |
| 20 | 6  | 0 | -4.992364 | 0.748487  | 0.634201  |
| 21 | 1  | 0 | -5.996032 | -0.227542 | -1.002813 |
| 22 | 1  | 0 | -3.738288 | 1.525500  | 2.204435  |
| 23 | 15 | 0 | 0.789432  | 0.018557  | 0.520459  |
| 24 | 6  | 0 | 0.582969  | 1.733717  | -0.057998 |
| 25 | 6  | 0 | -0.590939 | 2.069903  | -0.740080 |
| 26 | 6  | 0 | 1.542645  | 2.722754  | 0.200897  |
| 27 | 6  | 0 | -0.808856 | 3.382230  | -1.154579 |
| 28 | 1  | 0 | -1.336263 | 1.305658  | -0.946745 |
| 29 | 6  | 0 | 1.318356  | 4.032779  | -0.206833 |
| 30 | 1  | 0 | 2.466673  | 2.466461  | 0.713868  |
| 31 | 6  | 0 | 0.143191  | 4.361382  | -0.884597 |
| 32 | 1  | 0 | -1.720309 | 3.637719  | -1.685761 |
| 33 | 1  | 0 | 2.060668  | 4.797728  | -0.001755 |
| 34 | 1  | 0 | -0.026537 | 5.384738  | -1.205138 |
| 35 | 6  | 0 | 2.555479  | -0.320839 | 0.237945  |
| 36 | 6  | 0 | 3.140239  | -0.015093 | -0.997969 |
| 37 | 6  | 0 | 3.302529  | -0.996997 | 1.209246  |
| 38 | 6  | 0 | 4.463007  | -0.365809 | -1.248424 |
| 39 | 1  | 0 | 2.566430  | 0.510887  | -1.757698 |
| 40 | 6  | 0 | 4.628370  | -1.341367 | 0.954299  |
| 41 | 1  | 0 | 2.850472  | -1.244522 | 2.166089  |
| 42 | 6  | 0 | 5.208531  | -1.026971 | -0.272436 |
| 43 | 1  | 0 | 4.914635  | -0.118016 | -2.203989 |
| 44 | 1  | 0 | 5.207206  | -1.854582 | 1.716058  |
| 45 | 1  | 0 | 6.241614  | -1.296089 | -0.469367 |
| 46 | 8  | 0 | 0.674007  | 0.079984  | 2.168613  |
| 47 | 1  | 0 | 1.247206  | 0.755982  | 2.578412  |
| 48 | 1  | 0 | -5.812116 | 1.428908  | 0.839876  |

-----  
1 imaginary frequencies (78.31  $\text{icm}^{-1}$ )

Zero-point Energies= -1322.524483  
Thermal Energies= -1322.502733  
Thermal Enthalpies= -1322.501788  
Thermal Free Energies= -1322.577433

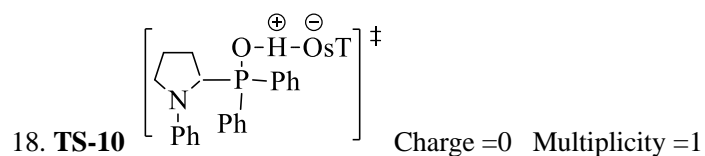

| Center Number | Atomic Number | Atomic Type | Coordinates (Angstroms) |           |           |
|---------------|---------------|-------------|-------------------------|-----------|-----------|
|               |               |             | X                       | Y         | Z         |
| 1             | 6             | 0           | 2.723232                | -3.359426 | -0.513848 |
| 2             | 6             | 0           | 3.615050                | -2.276325 | 0.091982  |
| 3             | 6             | 0           | 2.059635                | -1.221195 | -1.425821 |
| 4             | 6             | 0           | 2.185127                | -2.711219 | -1.791884 |
| 5             | 1             | 0           | 3.286455                | -4.271791 | -0.720053 |
| 6             | 1             | 0           | 1.906695                | -3.612914 | 0.167363  |
| 7             | 1             | 0           | 4.650459                | -2.363426 | -0.265894 |
| 8             | 1             | 0           | 3.629791                | -2.320775 | 1.186507  |
| 9             | 1             | 0           | 2.232933                | -0.585060 | -2.302712 |
| 10            | 1             | 0           | 1.243473                | -3.143406 | -2.139936 |
| 11            | 1             | 0           | 2.916017                | -2.796110 | -2.601505 |
| 12            | 7             | 0           | 3.037827                | -1.005873 | -0.373254 |
| 13            | 6             | 0           | 3.776685                | 0.172271  | -0.253962 |
| 14            | 6             | 0           | 4.859626                | 0.224987  | 0.643938  |
| 15            | 6             | 0           | 3.472293                | 1.333454  | -0.988237 |
| 16            | 6             | 0           | 5.602840                | 1.391402  | 0.793247  |
| 17            | 1             | 0           | 5.120435                | -0.646067 | 1.233903  |
| 18            | 6             | 0           | 4.225483                | 2.490717  | -0.826757 |
| 19            | 1             | 0           | 2.635951                | 1.352556  | -1.676877 |
| 20            | 6             | 0           | 5.297304                | 2.535609  | 0.061763  |
| 21            | 1             | 0           | 6.432670                | 1.397747  | 1.494344  |
| 22            | 1             | 0           | 3.959502                | 3.369629  | -1.407429 |
| 23            | 15            | 0           | 0.345626                | -0.826588 | -0.851972 |
| 24            | 6             | 0           | 0.201173                | 0.948902  | -0.594262 |
| 25            | 6             | 0           | -0.090421               | 1.728708  | -1.722291 |
| 26            | 6             | 0           | 0.512250                | 1.560544  | 0.623165  |
| 27            | 6             | 0           | -0.043641               | 3.115750  | -1.631605 |
| 28            | 1             | 0           | -0.354042               | 1.254451  | -2.663354 |
| 29            | 6             | 0           | 0.574679                | 2.949459  | 0.699237  |
| 30            | 1             | 0           | 0.711079                | 0.967445  | 1.509250  |
| 31            | 6             | 0           | 0.304534                | 3.724707  | -0.425905 |

|    |    |   |           |           |           |
|----|----|---|-----------|-----------|-----------|
| 32 | 1  | 0 | -0.274236 | 3.719663  | -2.503469 |
| 33 | 1  | 0 | 0.838041  | 3.423907  | 1.639435  |
| 34 | 1  | 0 | 0.356717  | 4.807451  | -0.362450 |
| 35 | 6  | 0 | 0.008567  | -1.750283 | 0.654590  |
| 36 | 6  | 0 | 0.791487  | -1.624569 | 1.812676  |
| 37 | 6  | 0 | -1.045254 | -2.668819 | 0.611826  |
| 38 | 6  | 0 | 0.502130  | -2.407234 | 2.924789  |
| 39 | 1  | 0 | 1.629624  | -0.934577 | 1.841801  |
| 40 | 6  | 0 | -1.323927 | -3.449555 | 1.732111  |
| 41 | 1  | 0 | -1.658521 | -2.755366 | -0.280769 |
| 42 | 6  | 0 | -0.554431 | -3.318176 | 2.884835  |
| 43 | 1  | 0 | 1.104508  | -2.309419 | 3.822372  |
| 44 | 1  | 0 | -2.146677 | -4.156895 | 1.699867  |
| 45 | 1  | 0 | -0.774904 | -3.927832 | 3.755835  |
| 46 | 8  | 0 | -0.595925 | -1.284924 | -2.000596 |
| 47 | 1  | 0 | -1.605643 | -0.773915 | -2.156582 |
| 48 | 1  | 0 | 5.878952  | 3.443497  | 0.183005  |
| 49 | 16 | 0 | -3.793170 | -0.432358 | -1.397133 |
| 50 | 8  | 0 | -3.784885 | -1.838653 | -0.978680 |
| 51 | 8  | 0 | -5.048944 | 0.105182  | -1.914922 |
| 52 | 8  | 0 | -2.663658 | -0.152986 | -2.391317 |
| 53 | 6  | 0 | -3.333438 | 0.531911  | 0.027071  |
| 54 | 6  | 0 | -3.105475 | -0.093113 | 1.244967  |
| 55 | 6  | 0 | -2.704508 | 0.672327  | 2.340690  |
| 56 | 6  | 0 | -2.548724 | 2.053360  | 2.230812  |
| 57 | 6  | 0 | -2.798726 | 2.663158  | 0.991787  |
| 58 | 6  | 0 | -3.184693 | 1.914041  | -0.108990 |
| 59 | 1  | 0 | -3.238054 | -1.166174 | 1.330425  |
| 60 | 1  | 0 | -2.512429 | 0.183704  | 3.292631  |
| 61 | 1  | 0 | -2.675216 | 3.739054  | 0.893670  |
| 62 | 1  | 0 | -3.364554 | 2.390310  | -1.068829 |
| 63 | 6  | 0 | -2.125742 | 2.887194  | 3.410673  |
| 64 | 1  | 0 | -2.961528 | 3.491751  | 3.780813  |
| 65 | 1  | 0 | -1.774181 | 2.260498  | 4.234572  |
| 66 | 1  | 0 | -1.323187 | 3.579269  | 3.135082  |

-----  
1 imaginary frequencies (107.91  $\text{icm}^{-1}$ )

Zero-point Energies= -2217.153449

Thermal Energies= -2217.122107  
 Thermal Enthalpies= -2217.121163  
 Thermal Free Energies= -2217.217229

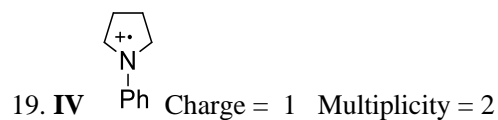

| Center Number | Atomic Number | Atomic Type | Coordinates (Angstroms) |           |           |
|---------------|---------------|-------------|-------------------------|-----------|-----------|
|               |               |             | X                       | Y         | Z         |
| 1             | 6             | 0           | -3.506478               | -0.689781 | 0.305625  |
| 2             | 6             | 0           | -2.108558               | -1.216352 | -0.008219 |
| 3             | 6             | 0           | -2.103912               | 1.219383  | -0.023394 |
| 4             | 6             | 0           | -3.504101               | 0.698255  | -0.335994 |
| 5             | 1             | 0           | -4.278846               | -1.348710 | -0.093113 |
| 6             | 1             | 0           | -3.637704               | -0.609471 | 1.388817  |
| 7             | 1             | 0           | -2.055932               | -1.669443 | -1.005610 |
| 8             | 1             | 0           | -1.723391               | -1.924606 | 0.727482  |
| 9             | 1             | 0           | -2.048483               | 1.671955  | 0.974087  |
| 10            | 1             | 0           | -1.716927               | 1.926483  | -0.759234 |
| 11            | 1             | 0           | -4.273539               | 1.360175  | 0.063457  |
| 12            | 1             | 0           | -3.636594               | 0.618507  | -1.419073 |
| 13            | 7             | 0           | -1.272798               | -0.000071 | -0.016417 |
| 14            | 6             | 0           | 0.070055                | -0.002679 | -0.017307 |
| 15            | 6             | 0           | 0.788265                | -1.232726 | -0.130987 |
| 16            | 6             | 0           | 0.793388                | 1.224486  | 0.095469  |
| 17            | 6             | 0           | 2.163820                | -1.220346 | -0.133568 |
| 18            | 1             | 0           | 0.249611                | -2.166949 | -0.234865 |
| 19            | 6             | 0           | 2.168856                | 1.206473  | 0.096515  |
| 20            | 1             | 0           | 0.258607                | 2.160885  | 0.199822  |
| 21            | 6             | 0           | 2.863308                | -0.008363 | -0.018871 |
| 22            | 1             | 0           | 2.709121                | -2.152843 | -0.228130 |
| 23            | 1             | 0           | 2.718098                | 2.136720  | 0.190486  |
| 24            | 1             | 0           | 3.948150                | -0.010558 | -0.019469 |

0 imaginary frequencies

Zero-point Energies= -443.055473  
 Thermal Energies= -443.046302

Thermal Enthalpies= -443.045358

Thermal Free Energies= -443.090676

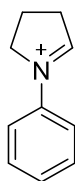

20. **VII** Charge = 1 Multiplicity = 1

| Center Number | Atomic Number | Atomic Type | Coordinates (Angstroms) |           |           |
|---------------|---------------|-------------|-------------------------|-----------|-----------|
|               |               |             | X                       | Y         | Z         |
| 1             | 6             | 0           | 3.101868                | 0.573042  | 0.465168  |
| 2             | 6             | 0           | 1.696439                | 1.153693  | 0.288515  |
| 3             | 6             | 0           | 1.620992                | -1.040124 | -0.423928 |
| 4             | 6             | 0           | 3.071321                | -0.734783 | -0.347007 |
| 5             | 1             | 0           | 3.868091                | 1.264986  | 0.117343  |
| 6             | 1             | 0           | 3.282597                | 0.351485  | 1.518898  |
| 7             | 1             | 0           | 1.622482                | 1.850625  | -0.550620 |
| 8             | 1             | 0           | 1.275075                | 1.612937  | 1.182949  |
| 9             | 1             | 0           | 1.174118                | -1.965043 | -0.776418 |
| 10            | 1             | 0           | 3.630640                | -1.559830 | 0.100438  |
| 11            | 1             | 0           | 3.441313                | -0.612137 | -1.374143 |
| 12            | 7             | 0           | 0.885256                | -0.049133 | -0.060594 |
| 13            | 6             | 0           | -0.549155               | -0.031591 | -0.025162 |
| 14            | 6             | 0           | -1.213814               | 1.168375  | -0.268389 |
| 15            | 6             | 0           | -1.243541               | -1.205252 | 0.264563  |
| 16            | 6             | 0           | -2.605024               | 1.179926  | -0.245425 |
| 17            | 1             | 0           | -0.661964               | 2.076516  | -0.487703 |
| 18            | 6             | 0           | -2.632807               | -1.176589 | 0.280985  |
| 19            | 1             | 0           | -0.708759               | -2.119661 | 0.501318  |
| 20            | 6             | 0           | -3.314149               | 0.011938  | 0.023893  |
| 21            | 1             | 0           | -3.132592               | 2.107521  | -0.440413 |
| 22            | 1             | 0           | -3.181559               | -2.083979 | 0.509969  |
| 23            | 1             | 0           | -4.399010               | 0.028703  | 0.043257  |

0 imaginary frequencies

Zero-point Energies= -442.479653

Thermal Energies= -442.470907

Thermal Enthalpies= -442.469963

Thermal Free Energies= -442.513740

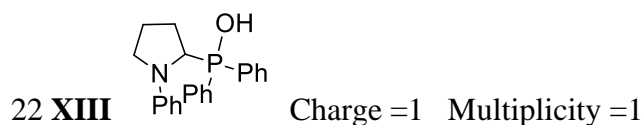

| Center Number | Atomic Number | Atomic Type | Coordinates (Angstroms) |           |           |
|---------------|---------------|-------------|-------------------------|-----------|-----------|
|               |               |             | X                       | Y         | Z         |
| 1             | 6             | 0           | -1.348807               | -2.856675 | 0.014923  |
| 2             | 6             | 0           | 0.046639                | -2.737804 | 0.623088  |
| 3             | 6             | 0           | -0.132081               | -1.182671 | -1.207922 |
| 4             | 6             | 0           | -1.153484               | -2.313469 | -1.401473 |
| 5             | 1             | 0           | -1.705430               | -3.888073 | 0.018870  |
| 6             | 1             | 0           | -2.066026               | -2.246017 | 0.572148  |
| 7             | 1             | 0           | 0.651536                | -3.628651 | 0.407042  |
| 8             | 1             | 0           | 0.018360                | -2.596544 | 1.707402  |
| 9             | 1             | 0           | 0.482750                | -1.037844 | -2.104102 |
| 10            | 1             | 0           | -2.076917               | -1.995537 | -1.891445 |
| 11            | 1             | 0           | -0.681296               | -3.068207 | -2.037537 |
| 12            | 7             | 0           | 0.637481                | -1.563276 | -0.041289 |
| 13            | 6             | 0           | 2.021203                | -1.348281 | 0.027295  |
| 14            | 6             | 0           | 2.770440                | -1.971838 | 1.039309  |
| 15            | 6             | 0           | 2.689518                | -0.489028 | -0.861719 |
| 16            | 6             | 0           | 4.138132                | -1.741830 | 1.149917  |
| 17            | 1             | 0           | 2.287074                | -2.634842 | 1.748022  |
| 18            | 6             | 0           | 4.056958                | -0.269282 | -0.737358 |
| 19            | 1             | 0           | 2.151805                | 0.033796  | -1.644870 |
| 20            | 6             | 0           | 4.795543                | -0.890763 | 0.266100  |
| 21            | 1             | 0           | 4.691163                | -2.238854 | 1.941552  |
| 22            | 1             | 0           | 4.544353                | 0.402813  | -1.437581 |
| 23            | 15            | 0           | -0.921013               | 0.467016  | -0.910783 |
| 24            | 6             | 0           | 0.248044                | 1.615835  | -0.190183 |
| 25            | 6             | 0           | 0.664152                | 2.707625  | -0.960750 |
| 26            | 6             | 0           | 0.802881                | 1.388486  | 1.078150  |
| 27            | 6             | 0           | 1.628157                | 3.575203  | -0.456527 |
| 28            | 1             | 0           | 0.253575                | 2.874885  | -1.951601 |
| 29            | 6             | 0           | 1.765440                | 2.261571  | 1.568933  |
| 30            | 1             | 0           | 0.512619                | 0.522458  | 1.664151  |
| 31            | 6             | 0           | 2.177575                | 3.351701  | 0.803433  |
| 32            | 1             | 0           | 1.952410                | 4.421708  | -1.052680 |
| 33            | 1             | 0           | 2.203363                | 2.082621  | 2.545297  |
| 34            | 1             | 0           | 2.934300                | 4.027240  | 1.189693  |
| 35            | 6             | 0           | -2.447685               | 0.379879  | 0.026366  |
| 36            | 6             | 0           | -2.486925               | 0.668849  | 1.395271  |
| 37            | 6             | 0           | -3.609497               | -0.030932 | -0.645709 |
| 38            | 6             | 0           | -3.680894               | 0.518596  | 2.093317  |
| 39            | 1             | 0           | -1.603645               | 1.021149  | 1.916679  |



|    |   |   |           |           |           |
|----|---|---|-----------|-----------|-----------|
| 40 | 6 | 0 | -4.797680 | -0.169958 | 0.061733  |
| 41 | 1 | 0 | -3.591930 | -0.232774 | -1.712941 |
| 42 | 6 | 0 | -4.830518 | 0.094735  | 1.430334  |
| 43 | 1 | 0 | -3.712250 | 0.740566  | 3.154823  |
| 44 | 1 | 0 | -5.697610 | -0.483842 | -0.456686 |
| 45 | 1 | 0 | -5.759631 | -0.020330 | 1.979503  |
| 46 | 8 | 0 | -1.289507 | 0.940000  | -2.401501 |
| 47 | 1 | 0 | -1.884186 | 1.715233  | -2.450477 |
| 48 | 1 | 0 | 5.861825  | -0.712974 | 0.358357  |

-----  
0 imaginary frequencies

Zero-point Energies= -1322.543063

Thermal Energies= -1322.521545

Thermal Enthalpies= -1322.520601

Thermal Free Energies= -1322.595093

## 10. NMR spectra of compound

$^1\text{H}$  NMR of DCQ ( $\text{CDCl}_3$ , 400 MHz)

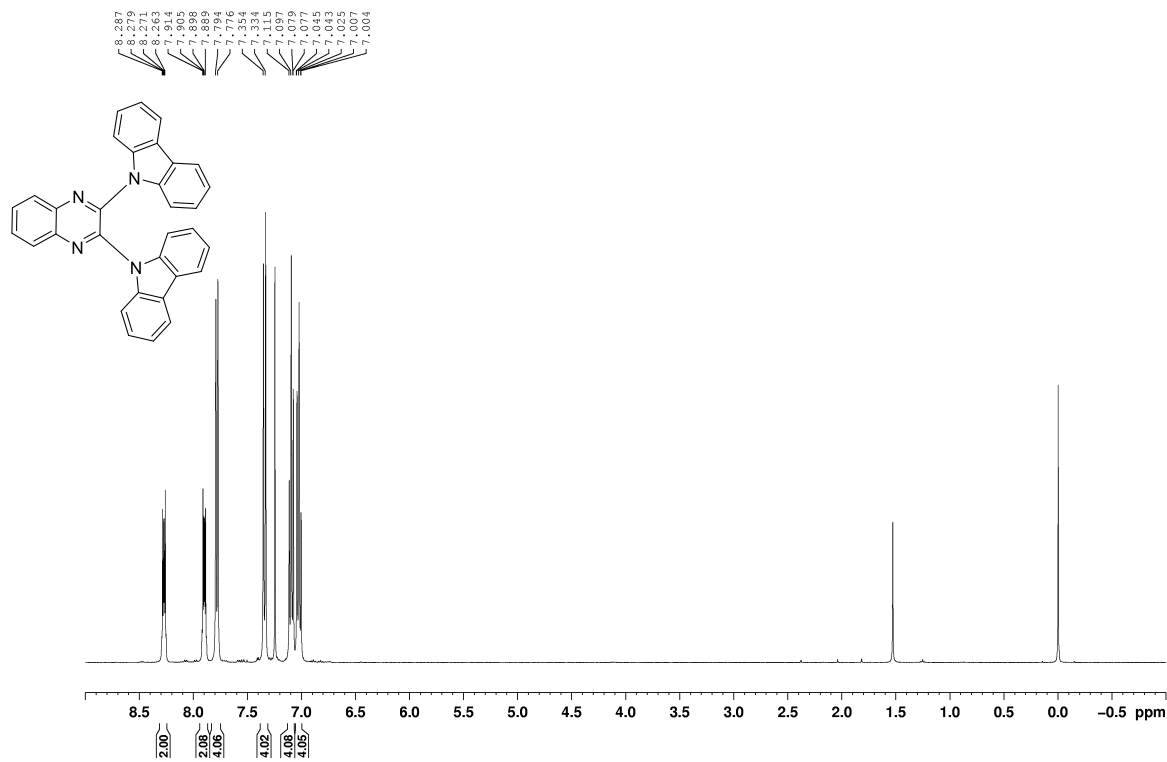

$^{13}\text{C}$  NMR of DCQ ( $\text{CDCl}_3$ , 101 MHz)

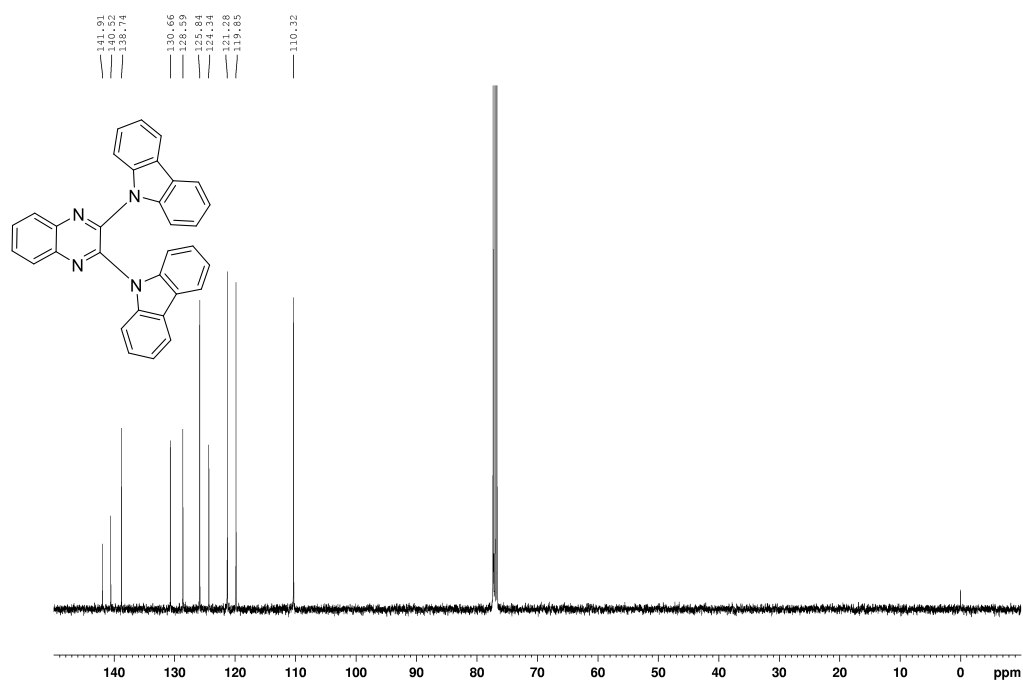

$^1\text{H}$  NMR of **3a** ( $\text{CDCl}_3$ , 400 MHz)

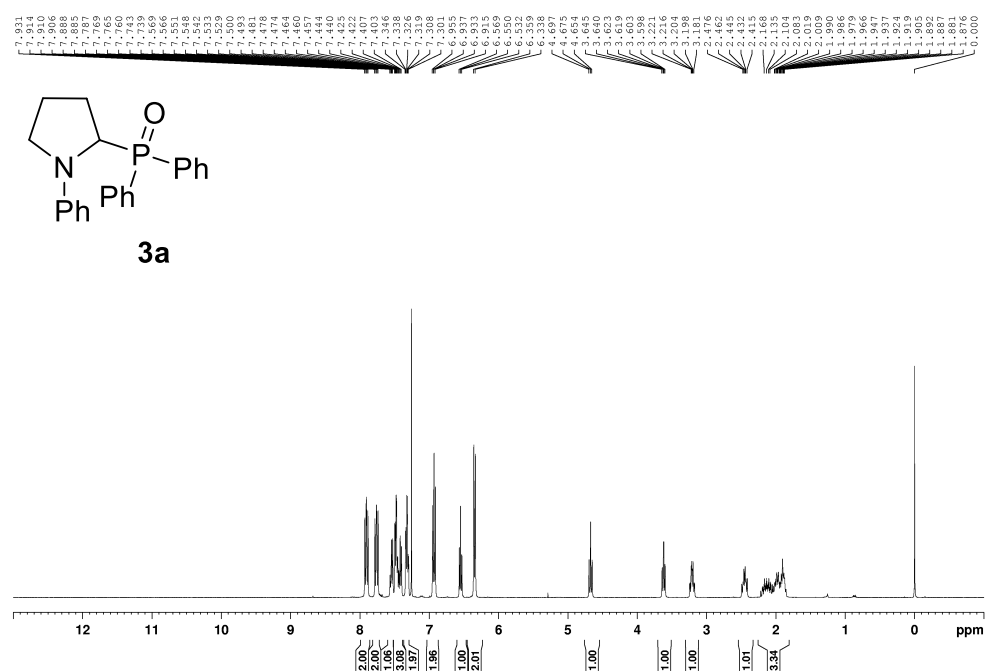

$^{31}\text{P}$  NMR of **3a** ( $\text{CDCl}_3$ , 162 MHz)

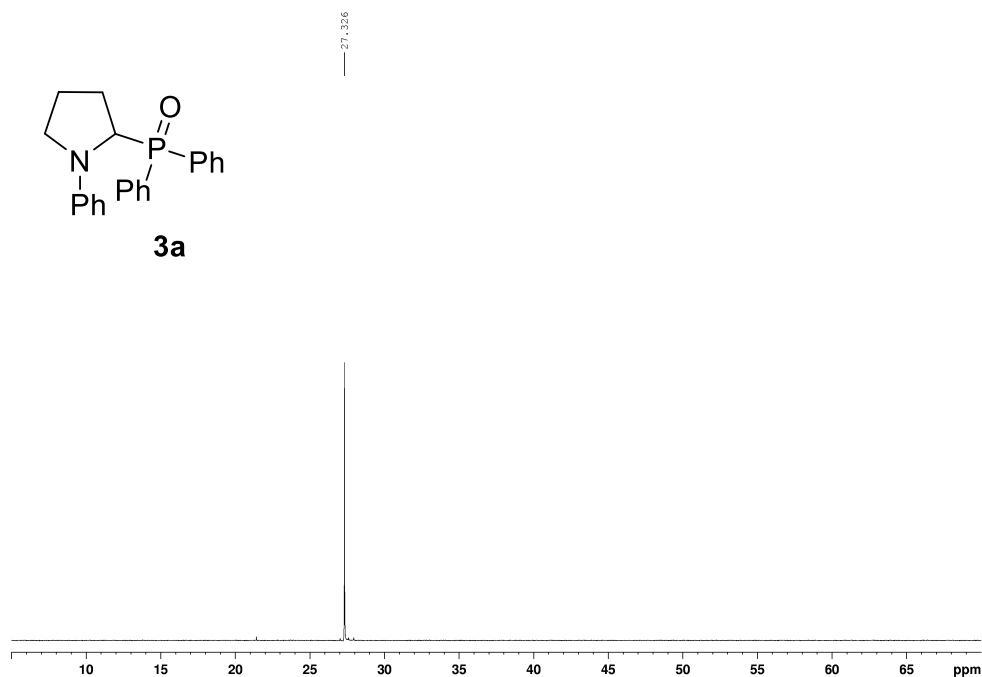

$^1\text{H}$  NMR of **3b** ( $\text{CDCl}_3$ , 400 MHz)

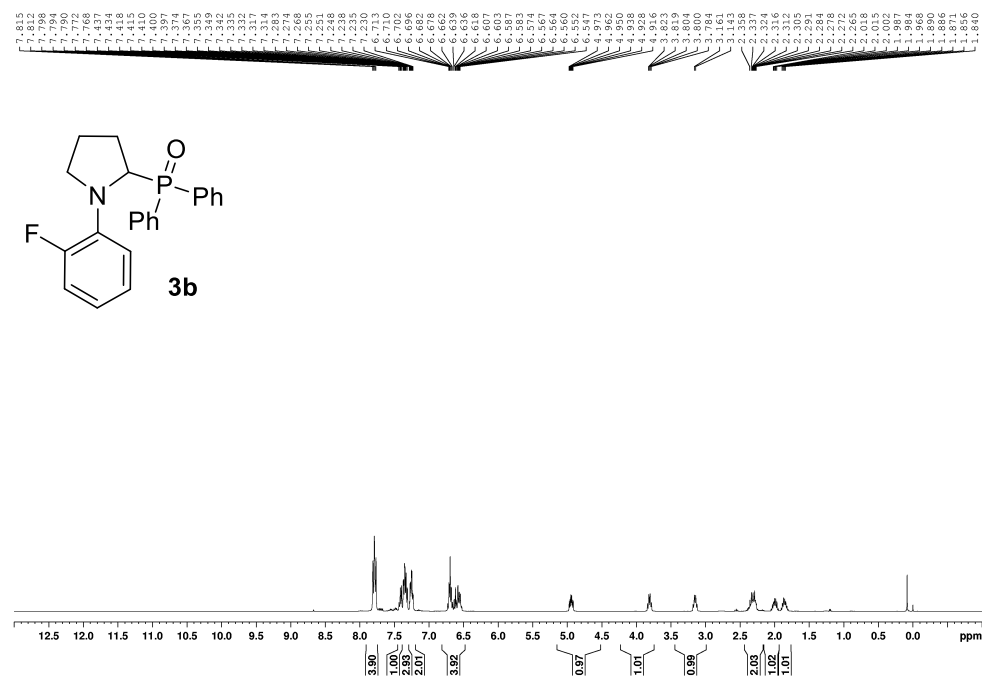

$^{13}\text{C}$  NMR of **3b** ( $\text{CDCl}_3$ , 101 MHz)

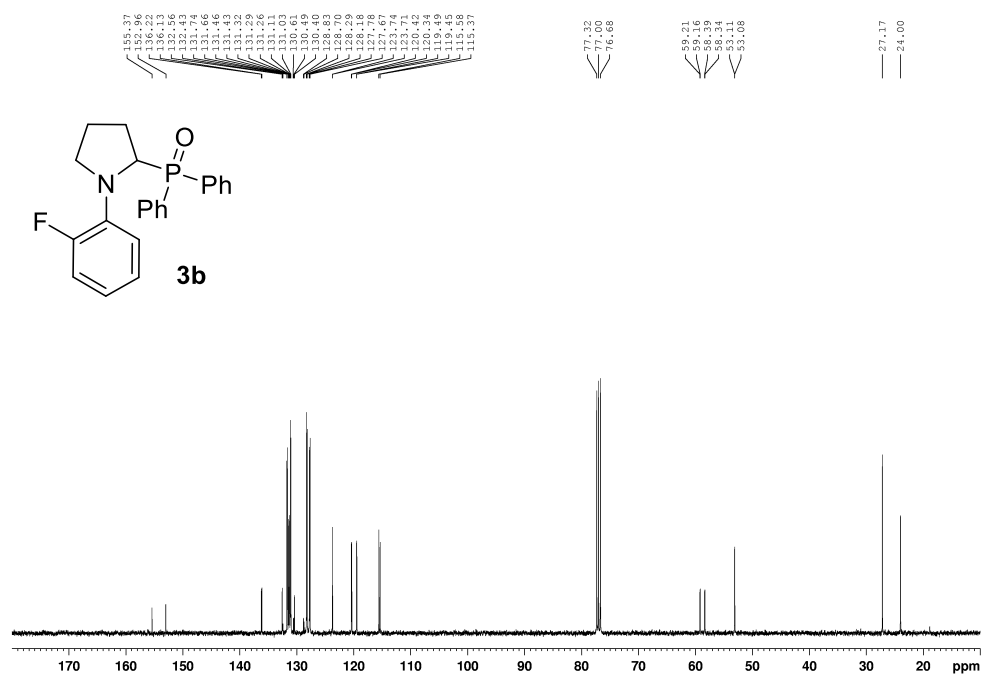

$^{31}\text{P}$  NMR of **3b** ( $\text{CDCl}_3$ , 162 MHz)

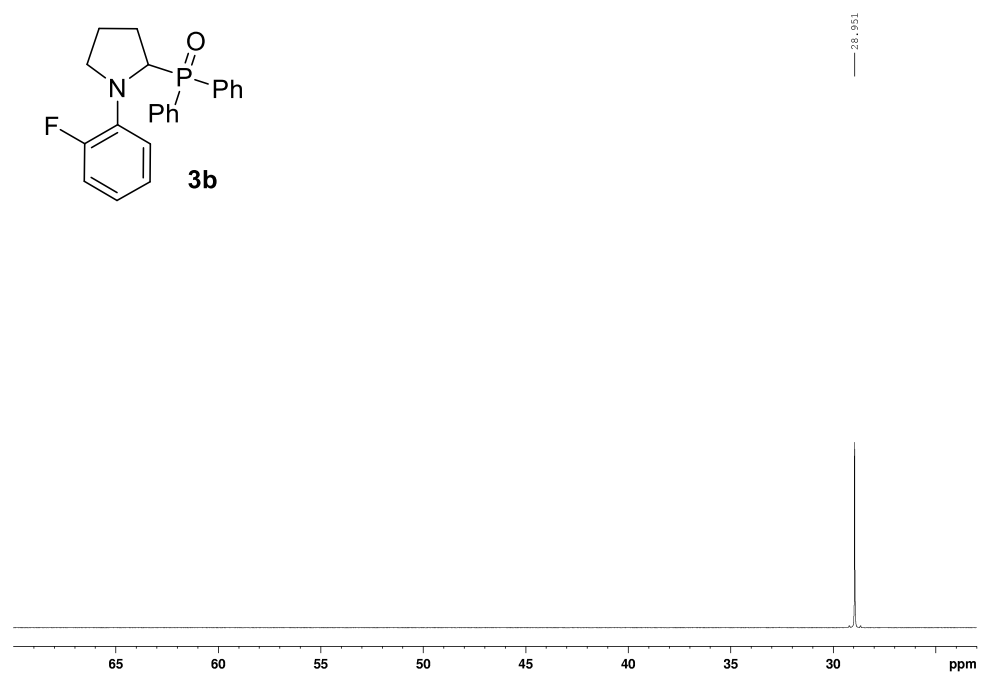

$^{19}\text{F}$  NMR of **3b** ( $\text{CDCl}_3$ , 376 MHz)

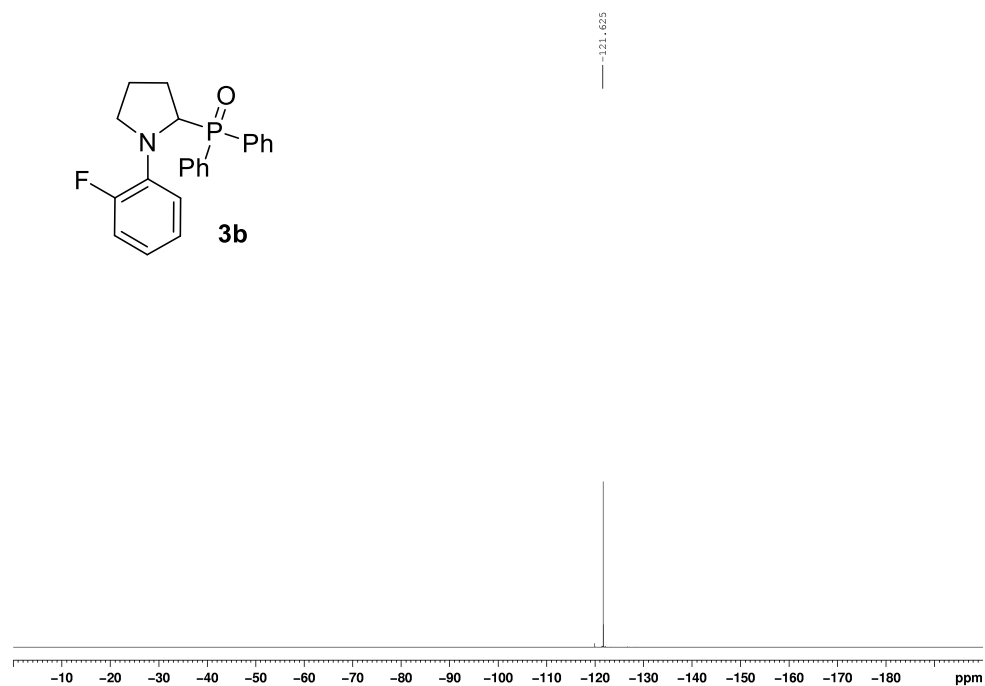

$^1\text{H}$  NMR of **3c** ( $\text{CDCl}_3$ , 400 MHz)

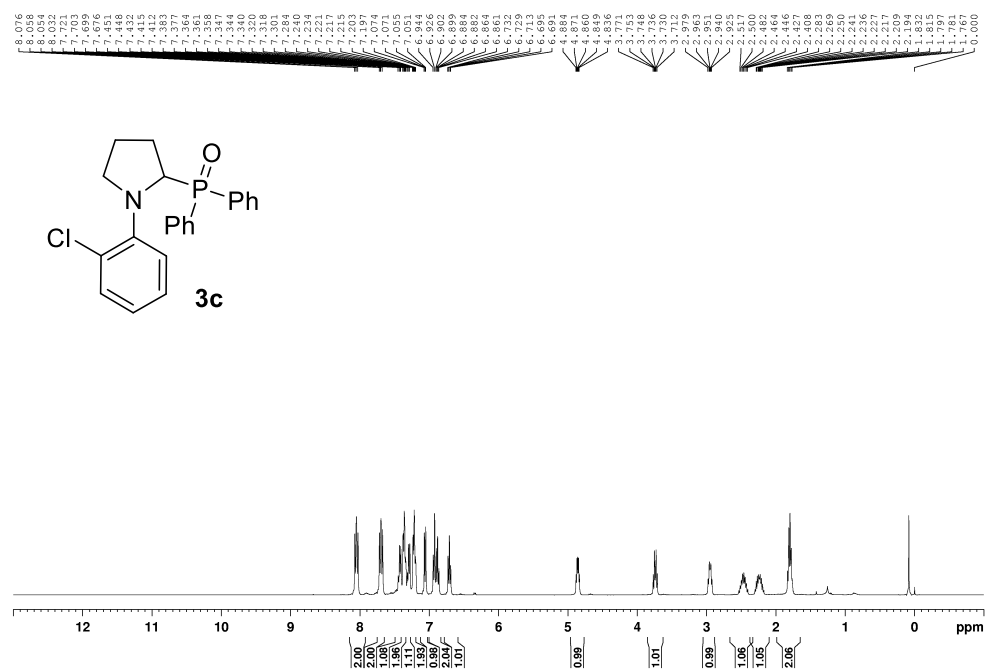

$^{13}\text{C}$  NMR of **3c** ( $\text{CDCl}_3$ , 101 MHz)

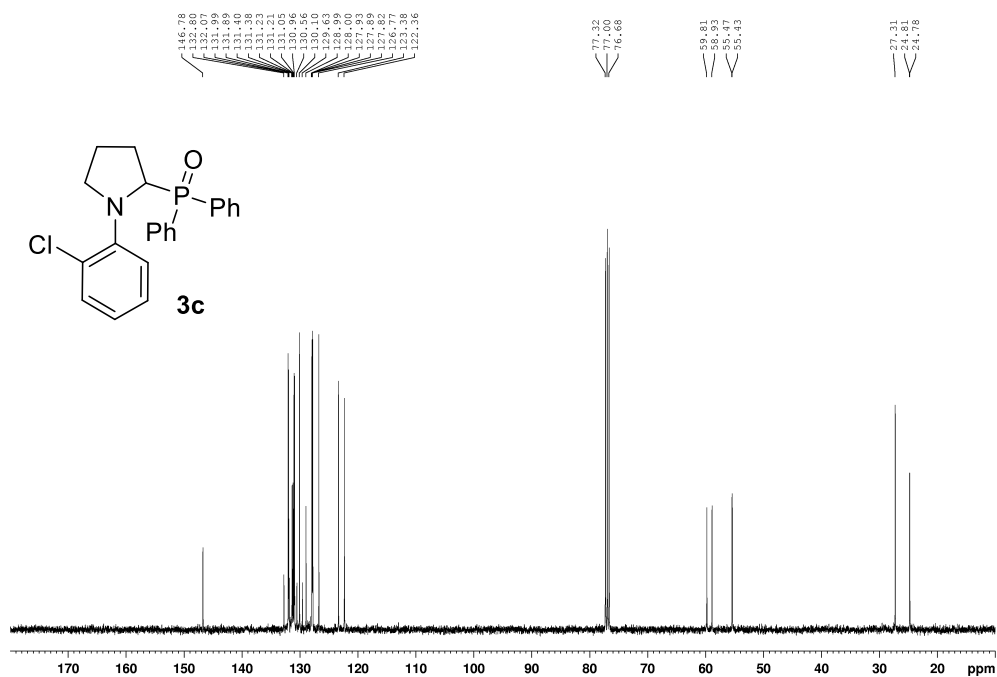

$^{31}\text{P}$  NMR of **3c** ( $\text{CDCl}_3$ , 162 MHz)

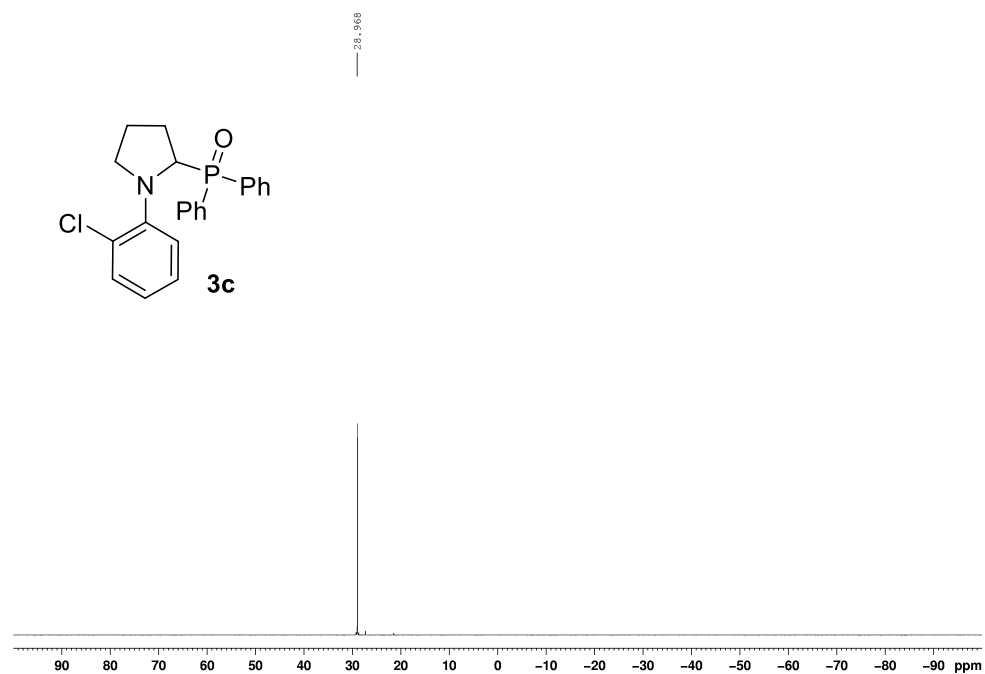





$^{31}\text{P}$  NMR of **3d** ( $\text{CDCl}_3$ , 162 MHz)

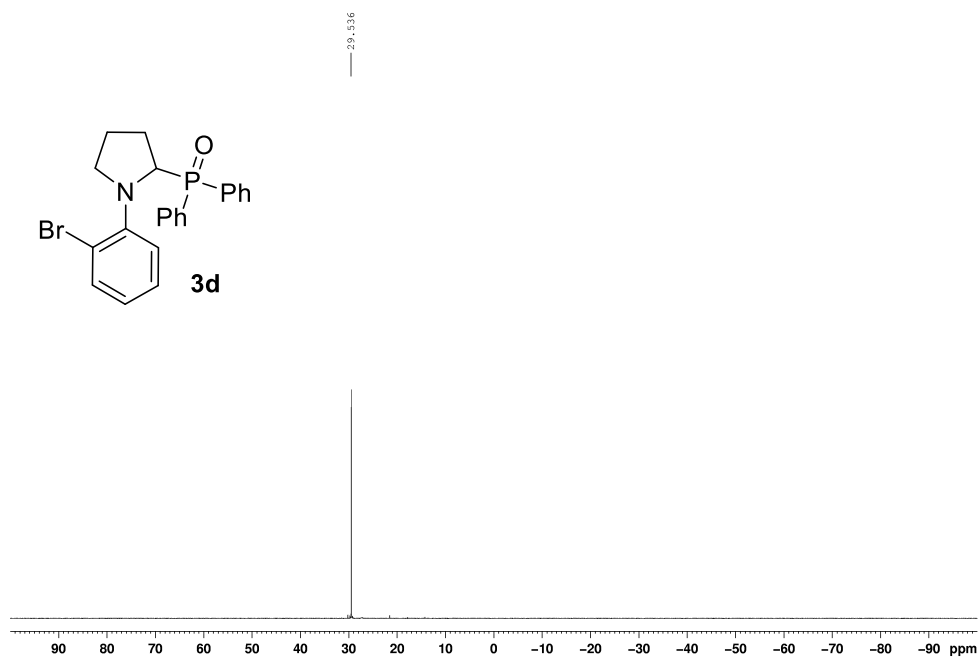

$^1\text{H}$  NMR of **3e** ( $\text{CDCl}_3$ , 600 MHz)

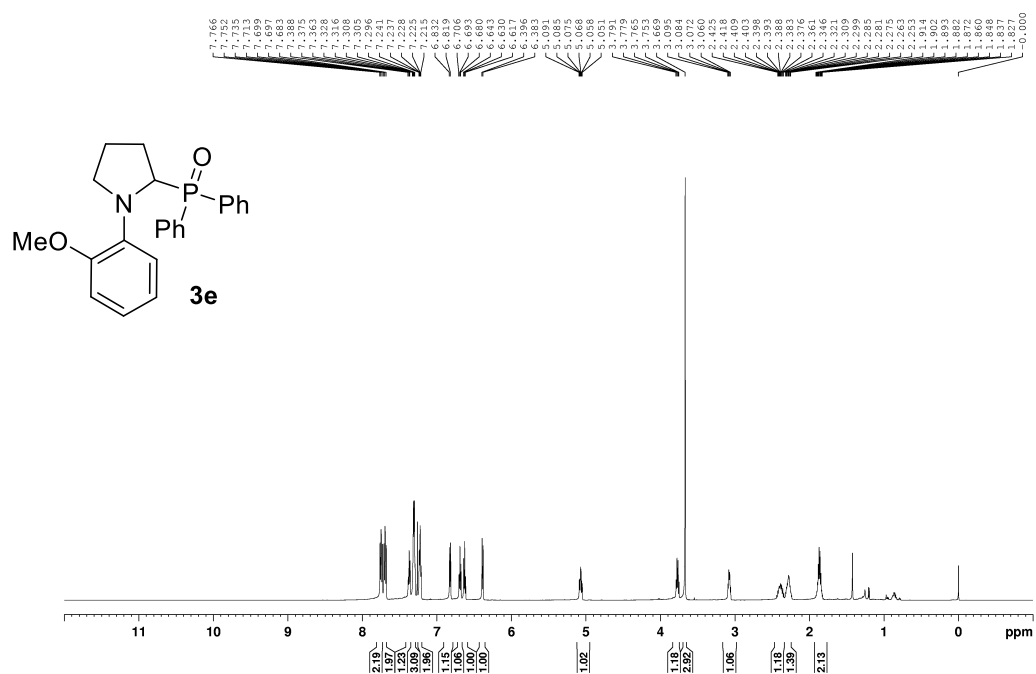

$^{13}\text{C}$  NMR of **3e** ( $\text{CDCl}_3$ , 151 MHz)

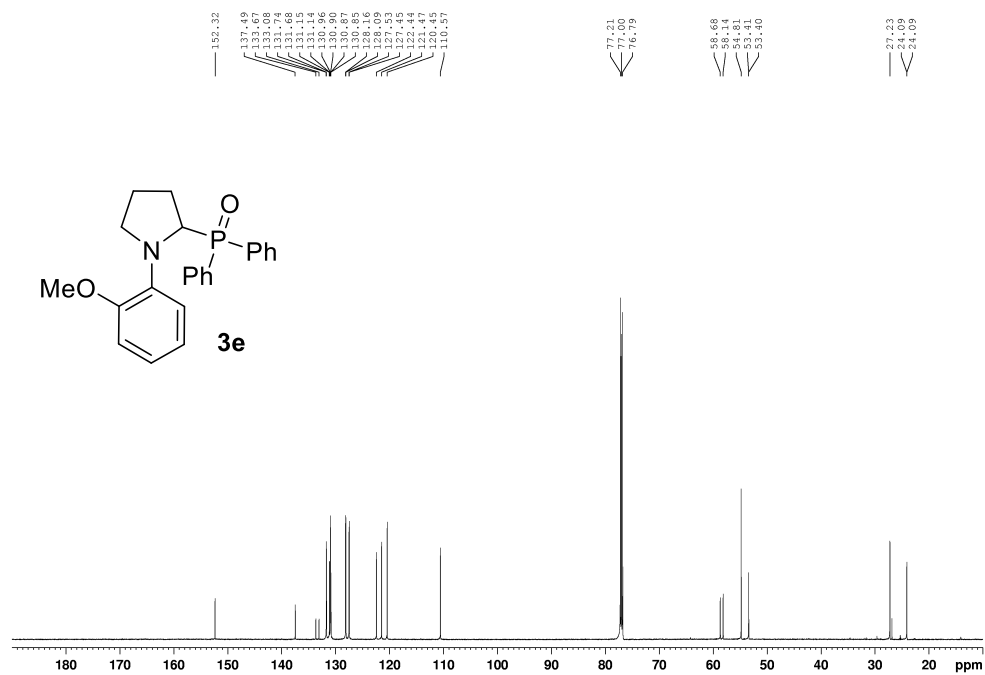

$^{31}\text{P}$  NMR of **3e** ( $\text{CDCl}_3$ , 243 MHz)

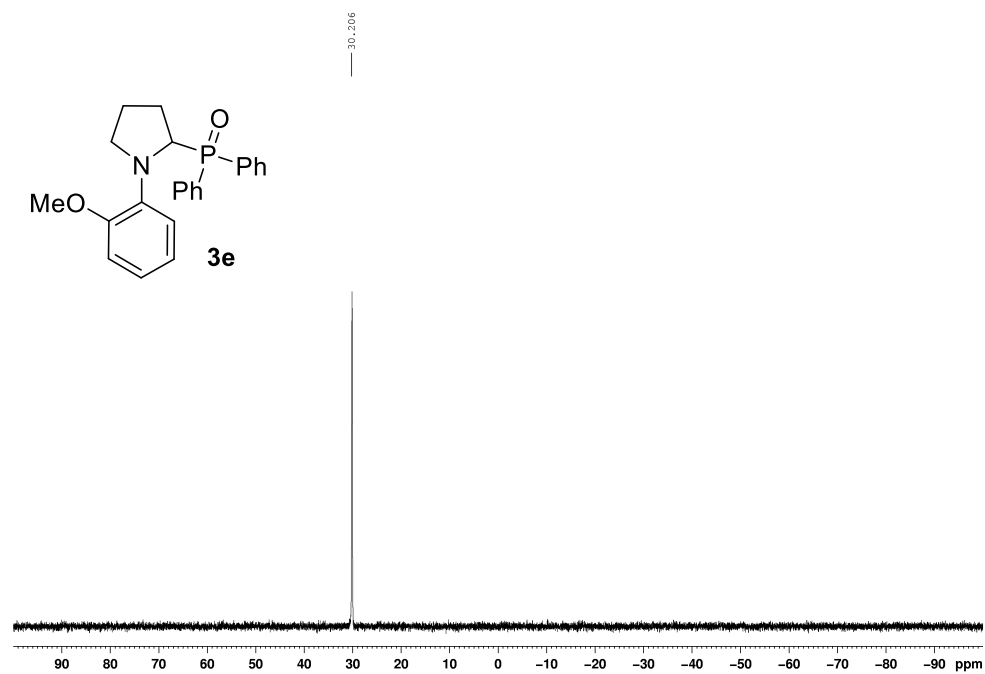

$^1\text{H}$  NMR of **3f** ( $\text{CDCl}_3$ , 400 MHz)

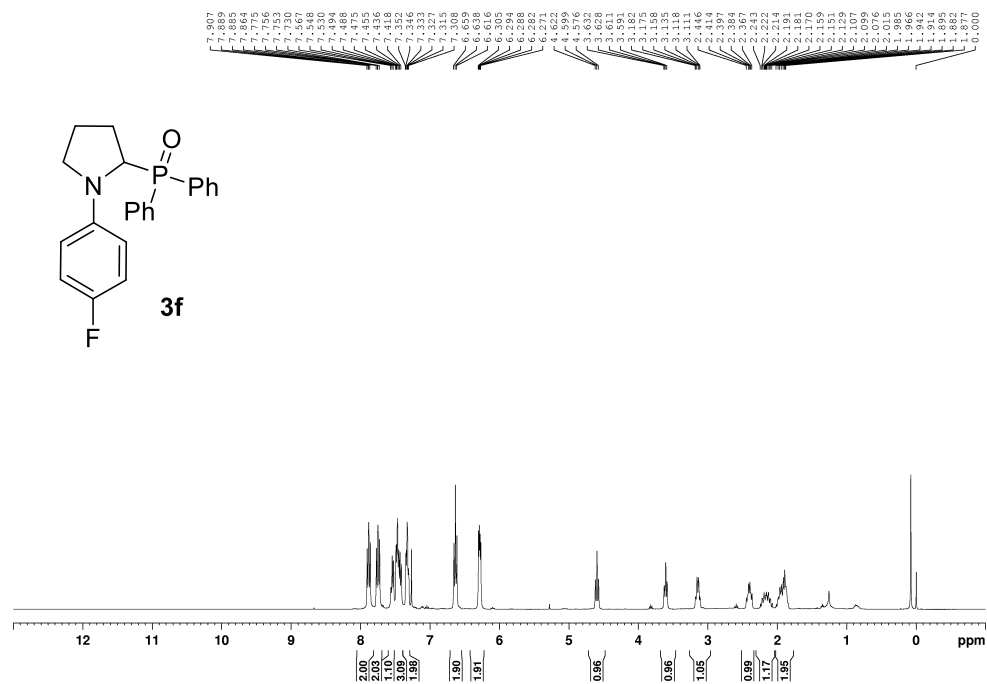

$^{13}\text{C}$  NMR of **3f** ( $\text{CDCl}_3$ , 101 MHz)

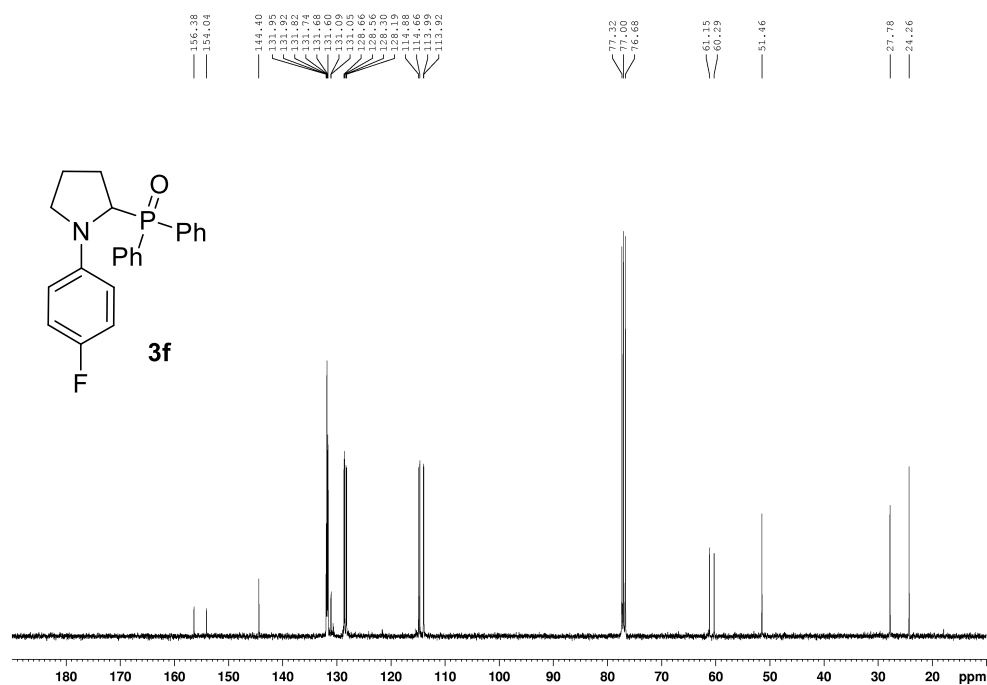

$^{31}\text{P}$  NMR of **3f** ( $\text{CDCl}_3$ , 162 MHz)

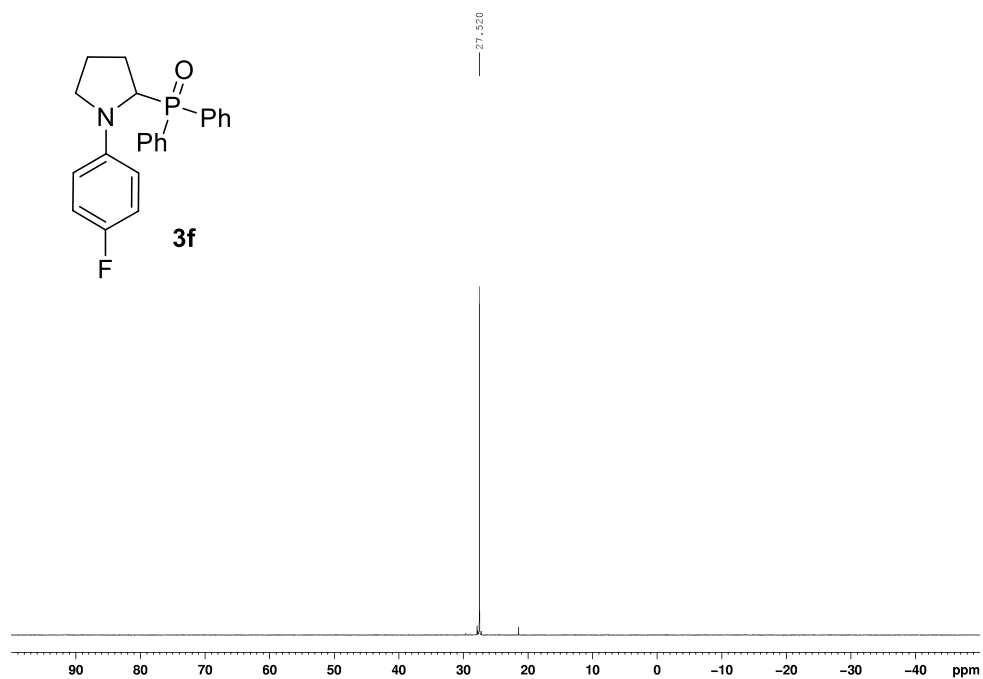

$^{19}\text{F}$  NMR of **3f** ( $\text{CDCl}_3$ , 376 MHz)

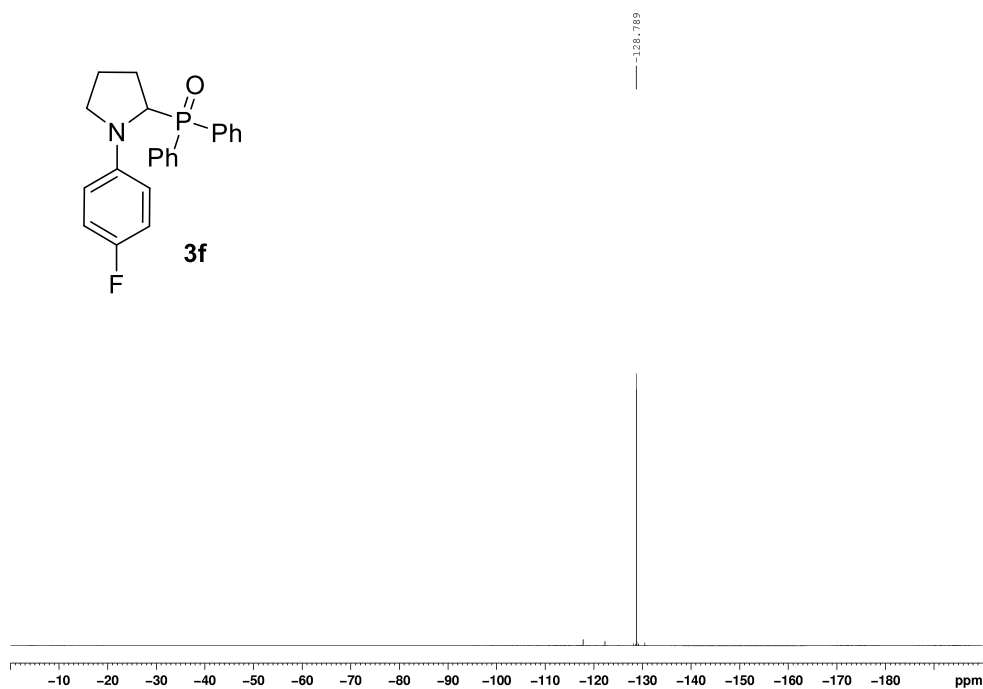

$^1\text{H}$  NMR of **3g** ( $\text{CDCl}_3$ , 400 MHz)

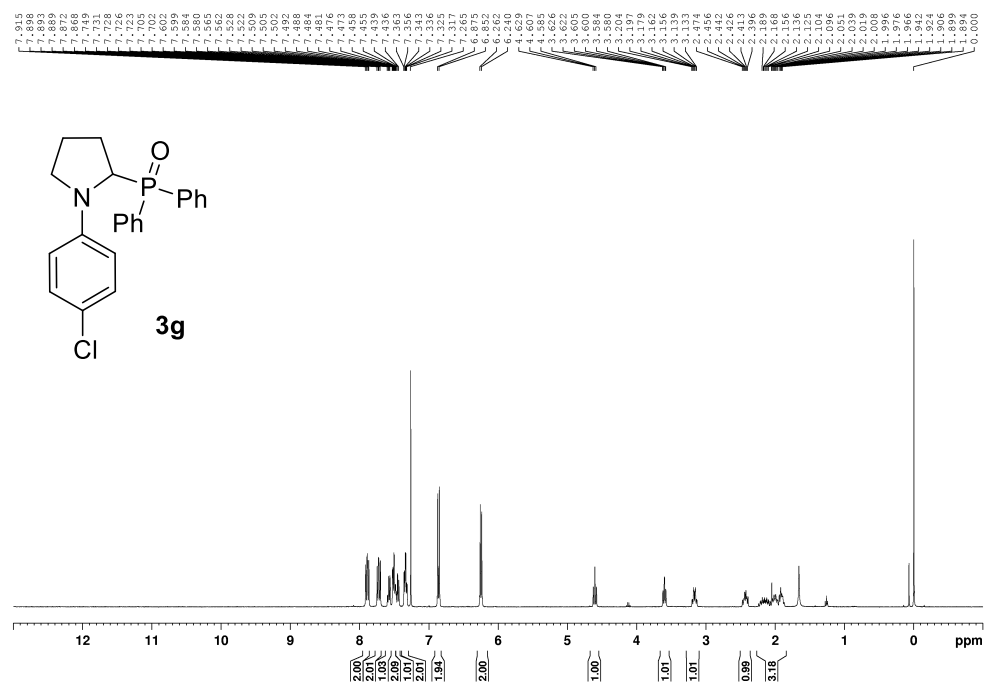

$^{13}\text{C}$  NMR of **3g** ( $\text{CDCl}_3$ , 101 MHz)

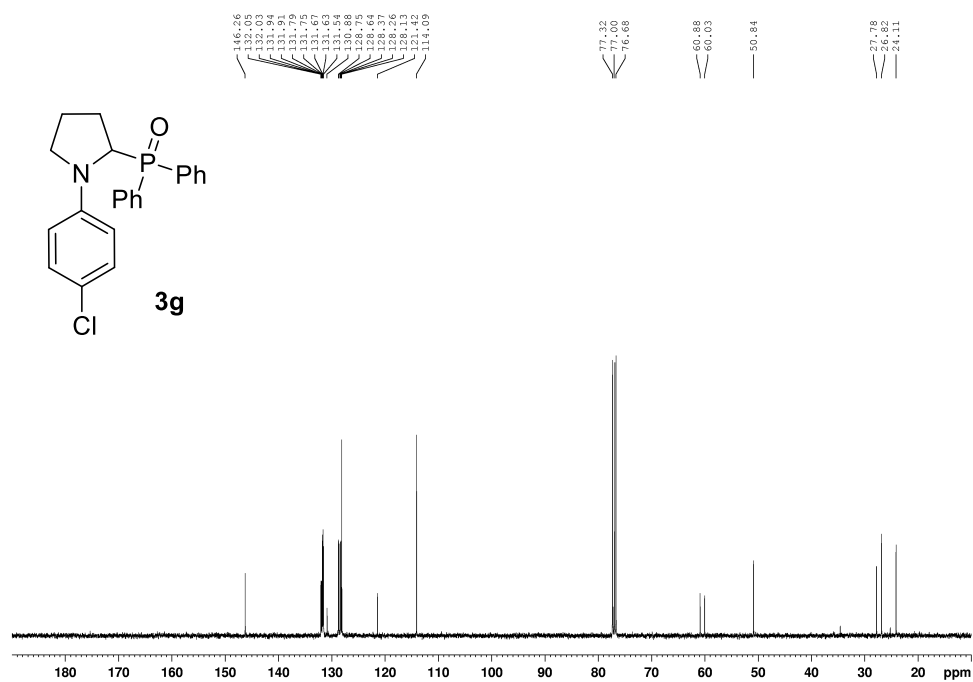

$^{31}\text{P}$  NMR of **3g** ( $\text{CDCl}_3$ , 162 MHz)

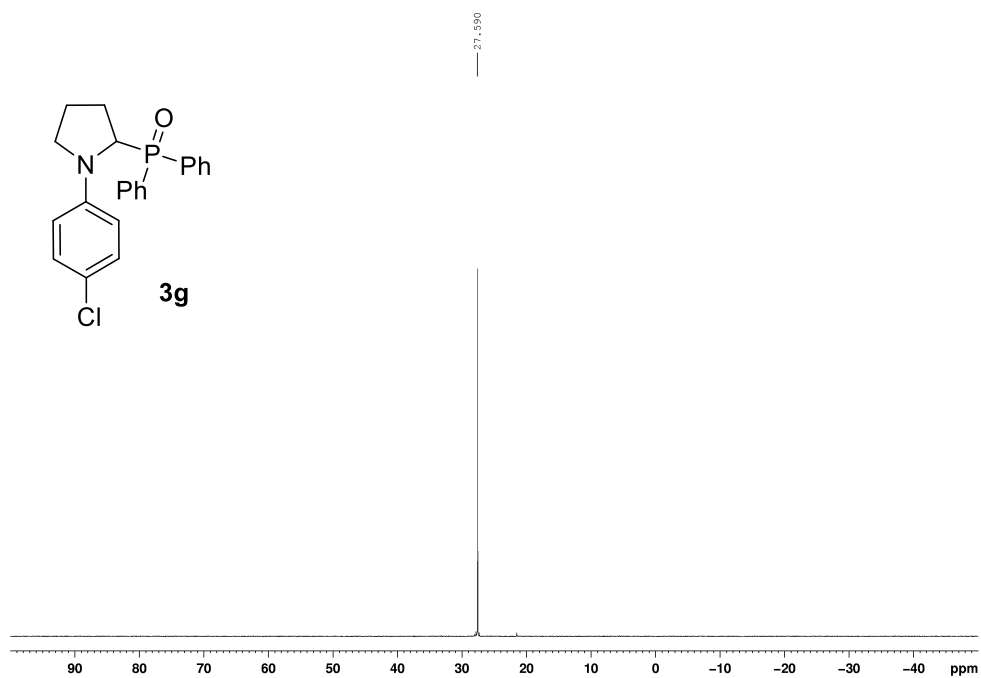

$^1\text{H}$  NMR of **3h** ( $\text{CDCl}_3$ , 600 MHz)

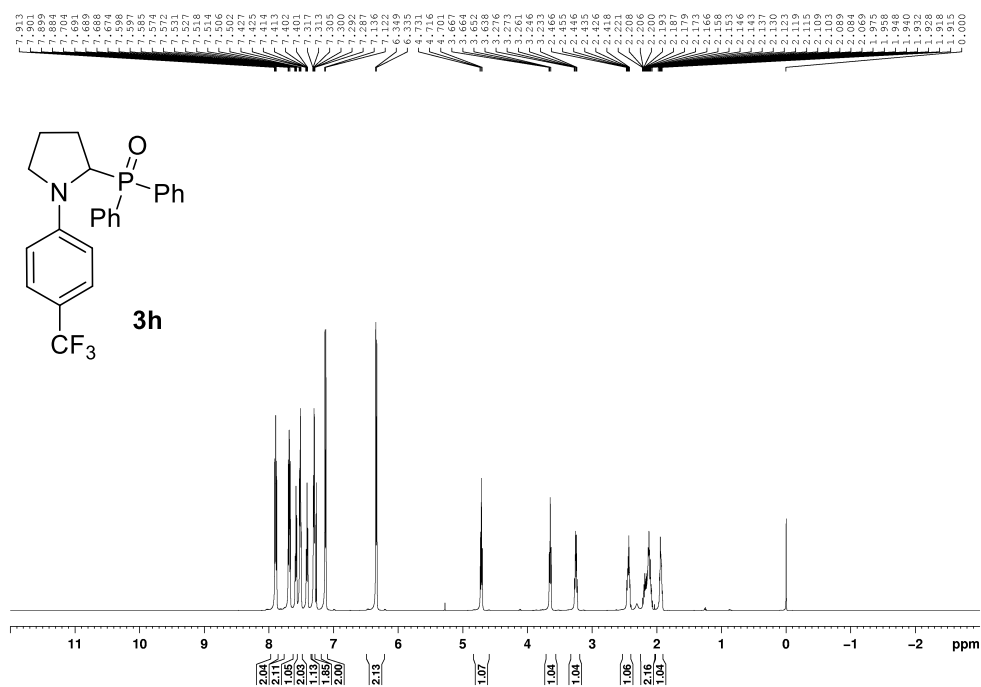

$^{13}\text{C}$  NMR of **3h** ( $\text{CDCl}_3$ , 151 MHz)

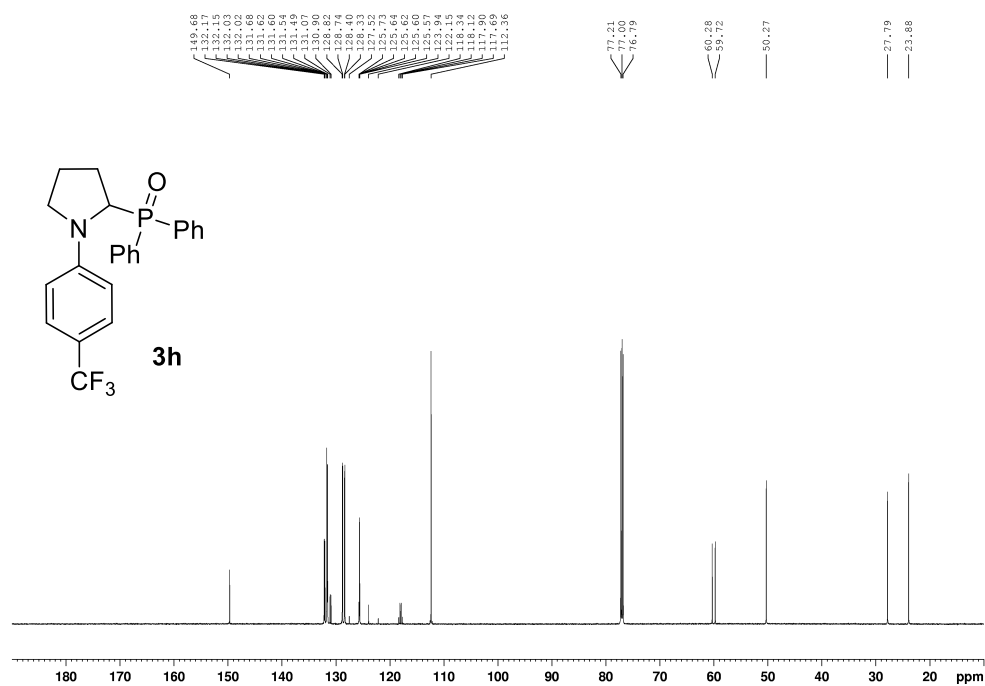

$^{31}\text{P}$  NMR of **3h** ( $\text{CDCl}_3$ , 243 MHz)

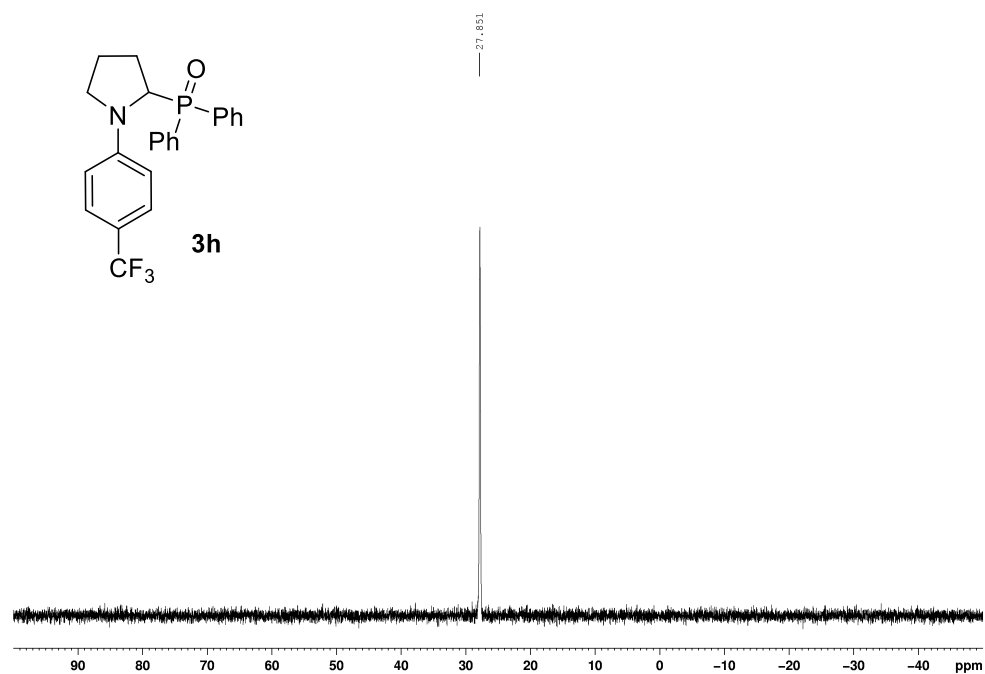

$^{19}\text{F}$  NMR of **3h** ( $\text{CDCl}_3$ , 376 MHz)

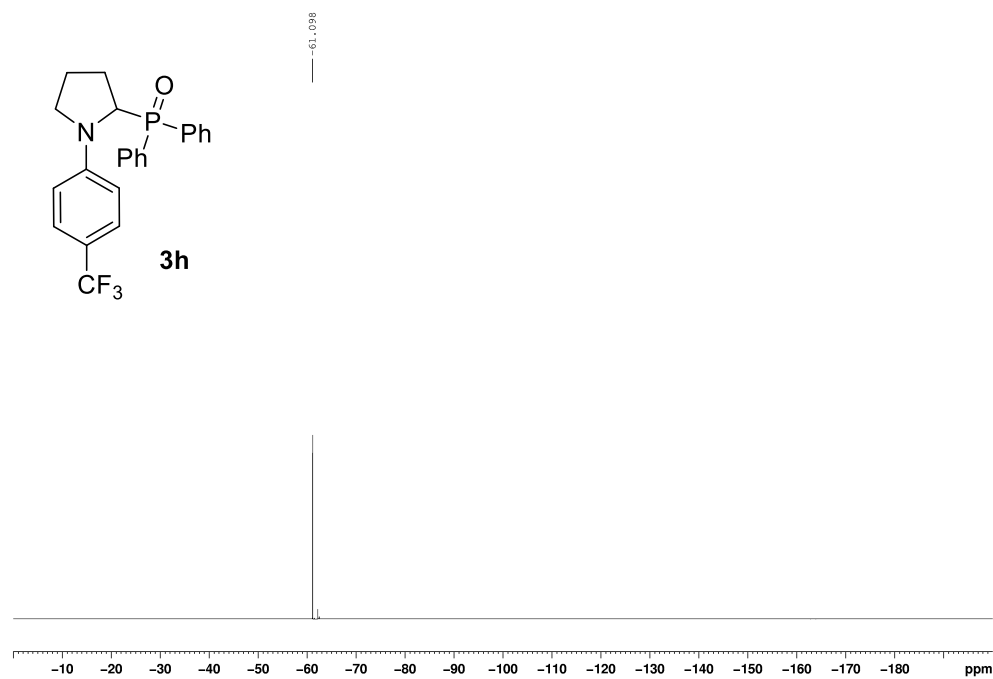

$^1\text{H}$  NMR of **3i** ( $\text{CDCl}_3$ , 400 MHz)

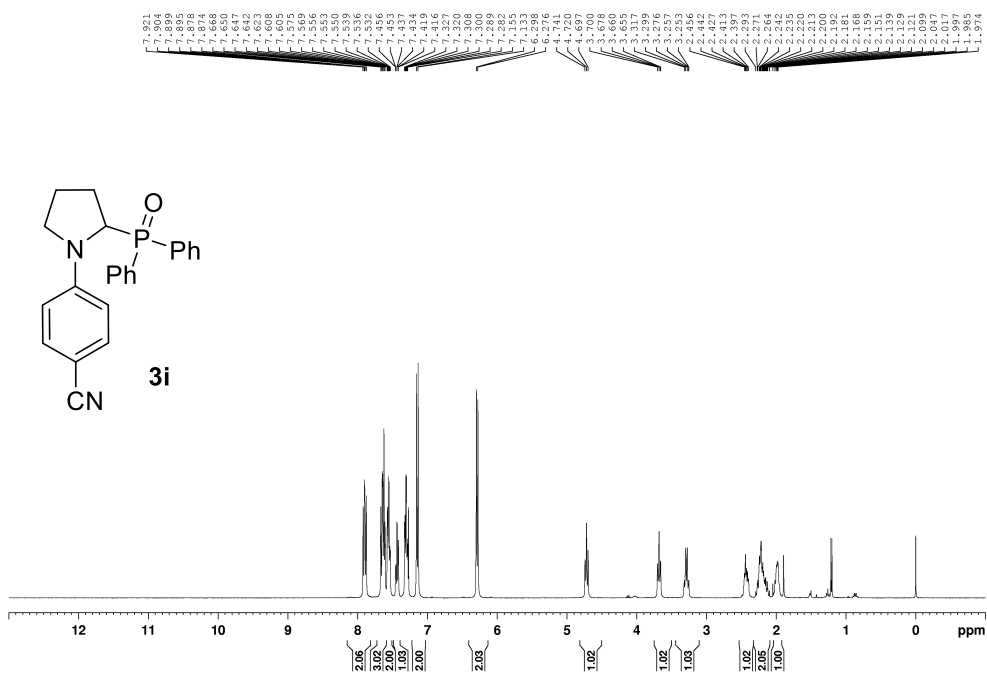



$^{13}\text{C}$  NMR of **3i** ( $\text{CDCl}_3$ , 101 MHz)

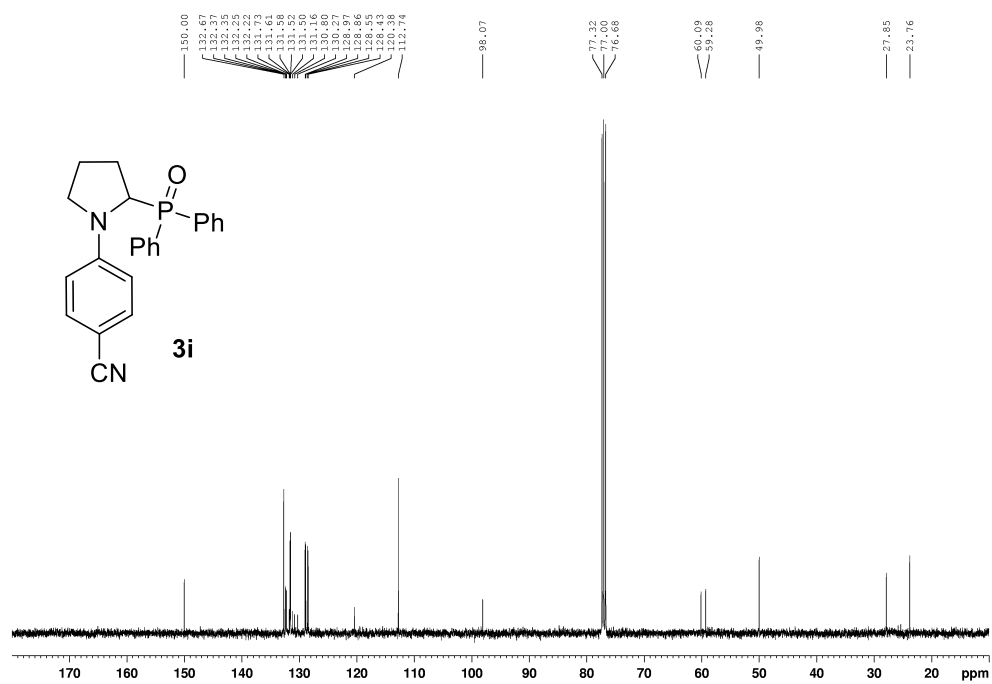

$^{31}\text{P}$  NMR of **3i** ( $\text{CDCl}_3$ , 162 MHz)

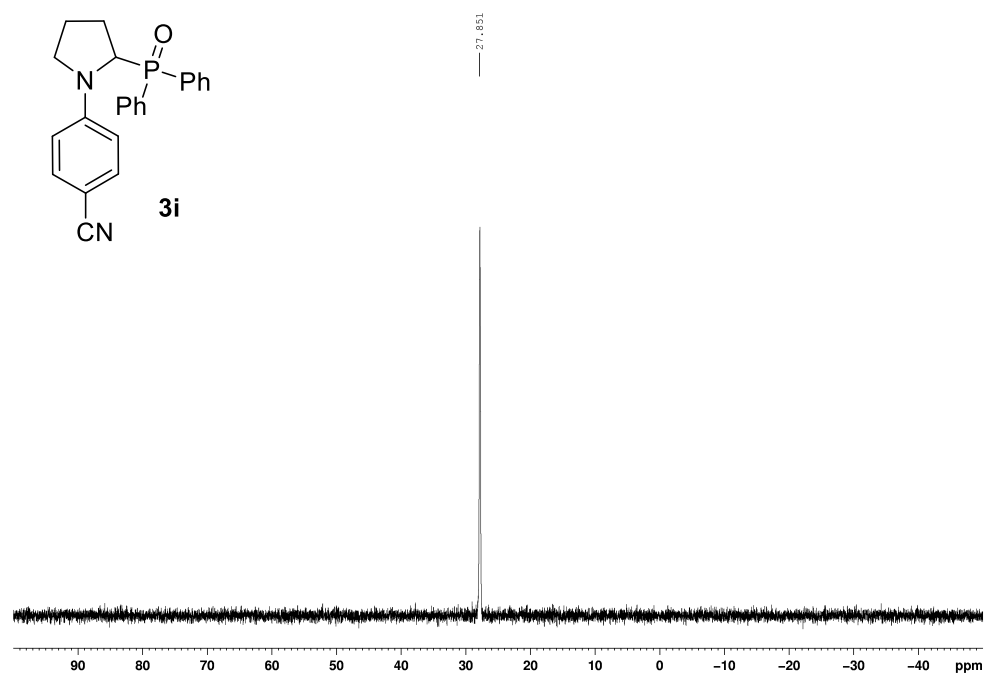

$^1\text{H}$  NMR of **3j** ( $\text{CDCl}_3$ , 400 MHz)

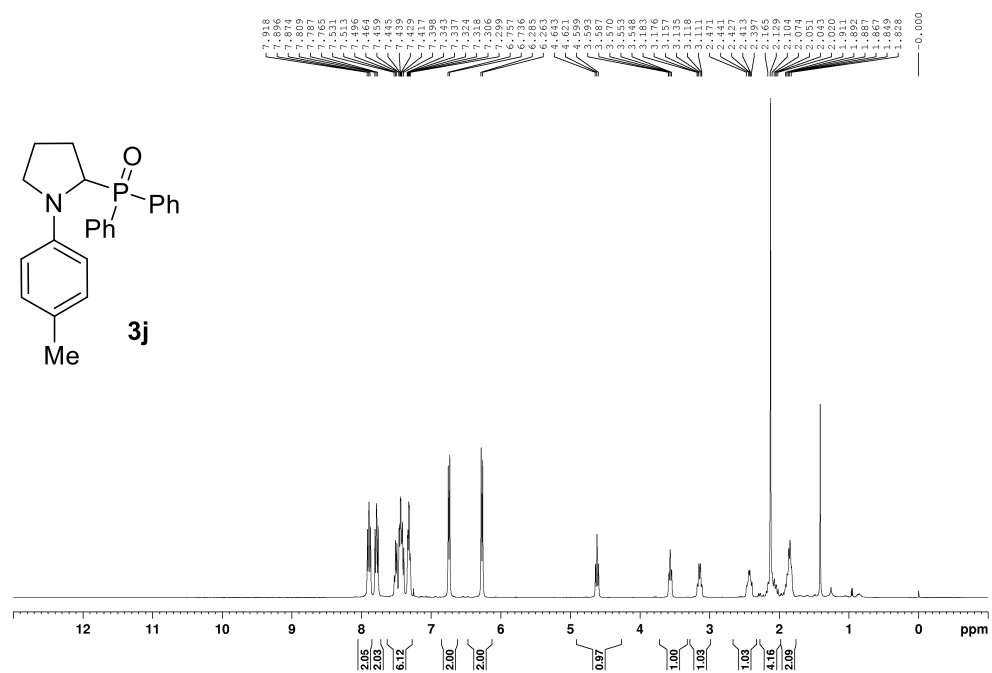

$^{13}\text{C}$  NMR of **3j** ( $\text{CDCl}_3$ , 101 MHz)

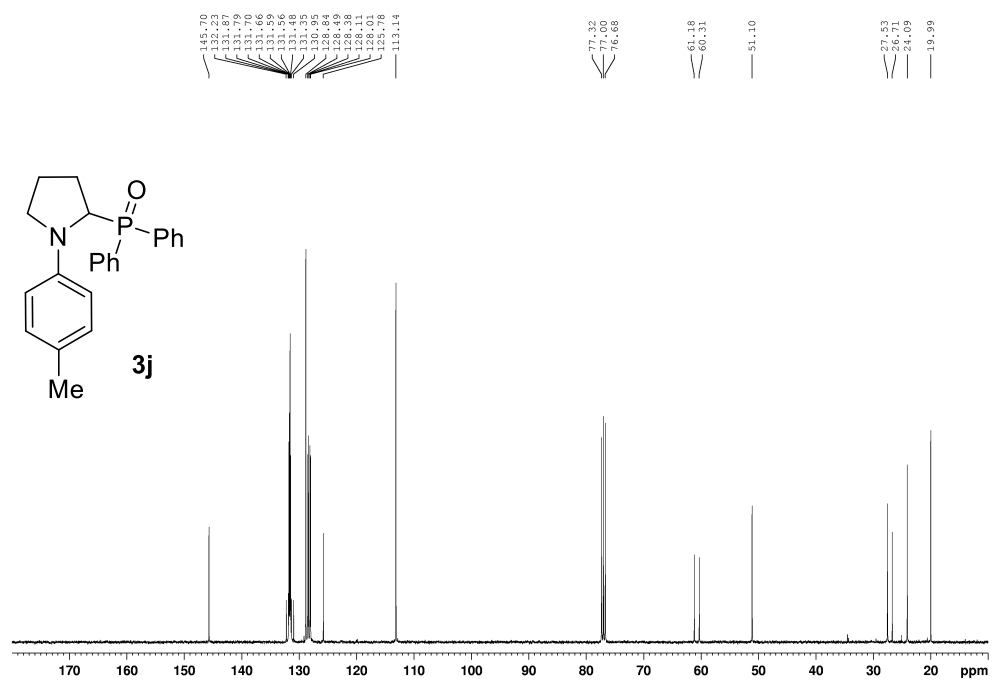

$^{31}\text{P}$  NMR of **3j** ( $\text{CDCl}_3$ , 162 MHz)

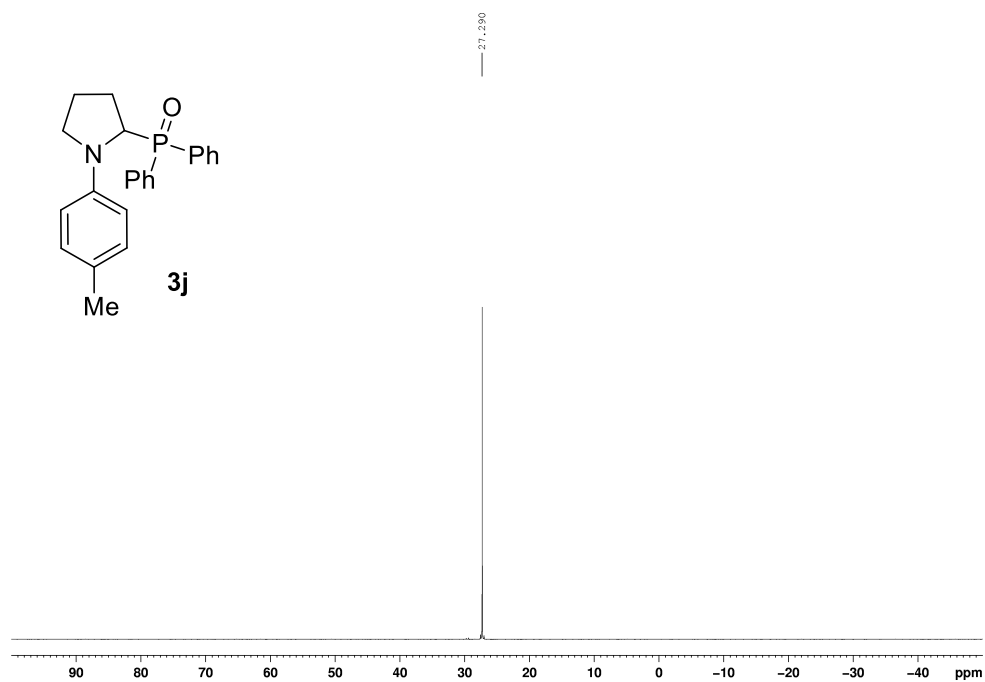

$^1\text{H}$  NMR of **3k** ( $\text{CDCl}_3$ , 400 MHz)

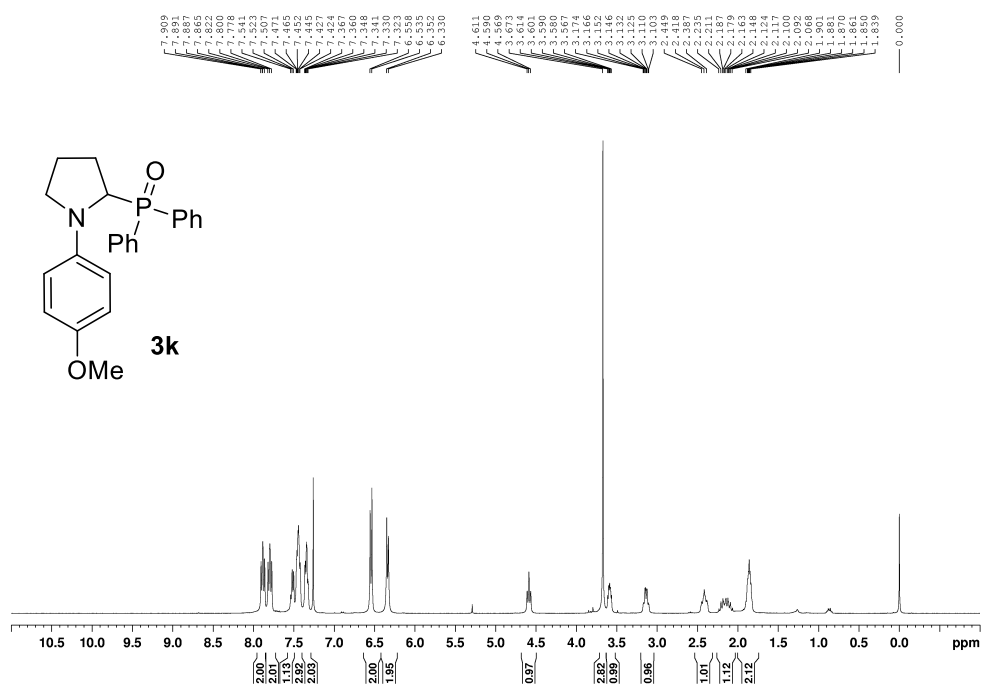

$^{13}\text{C}$  NMR of **3k** ( $\text{CDCl}_3$ , 101 MHz)

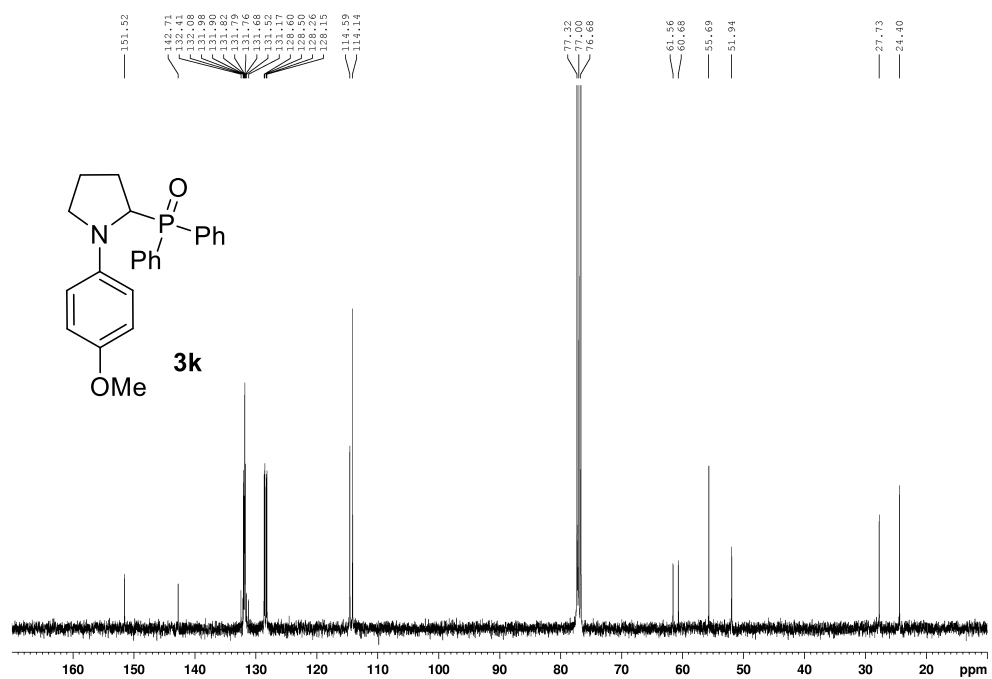

$^{31}\text{P}$  NMR of **3k** ( $\text{CDCl}_3$ , 162 MHz)

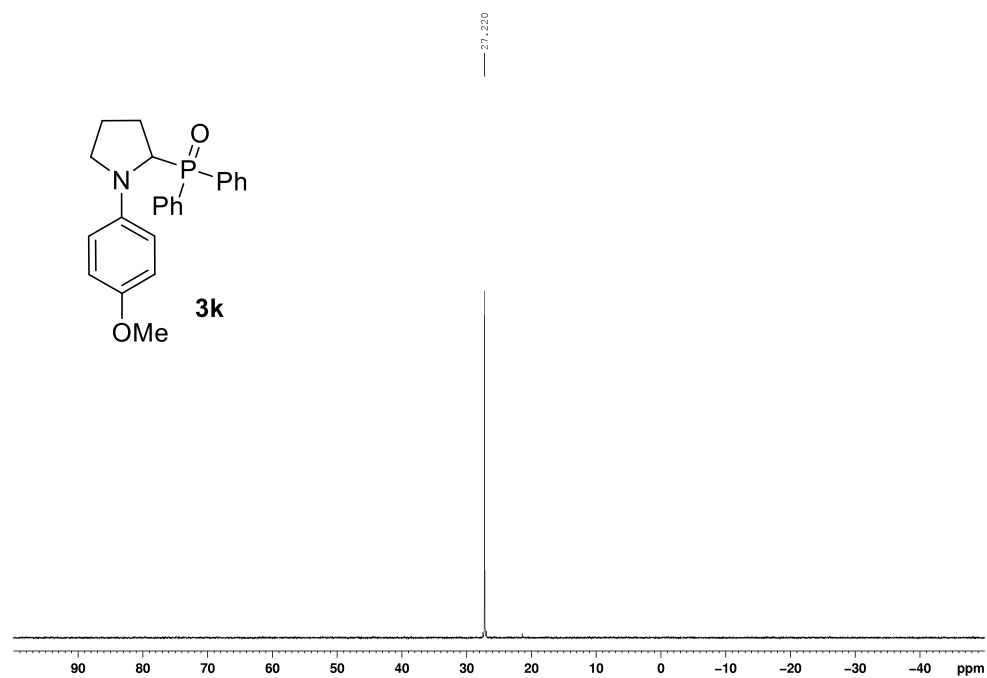

$^1\text{H}$  NMR of **3I** ( $\text{CDCl}_3$ , 600 MHz)

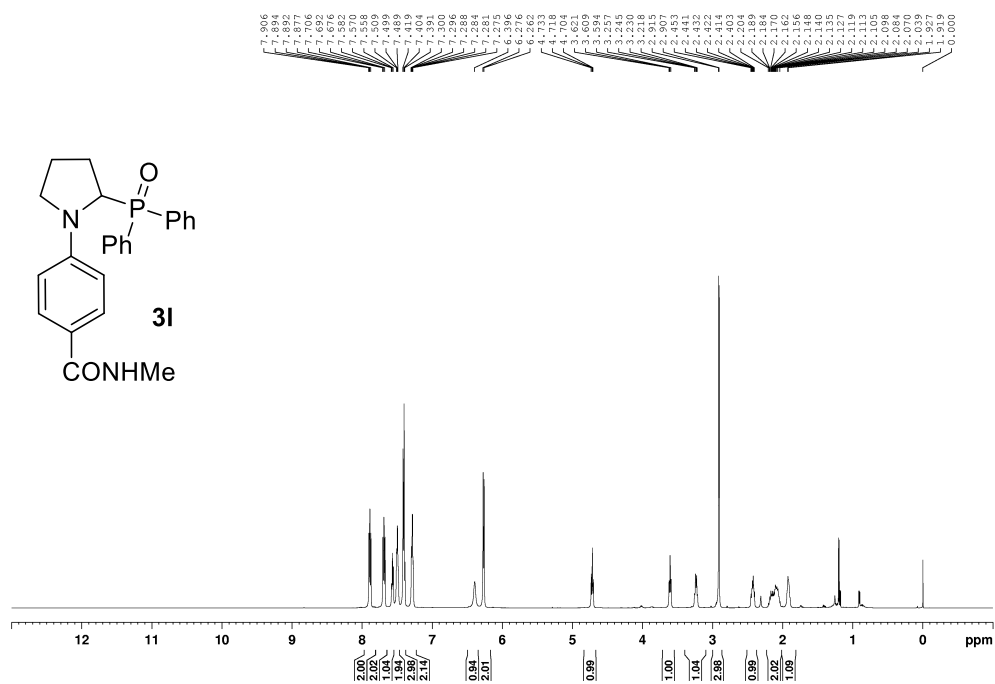

$^{13}\text{C}$  NMR of **3I** ( $\text{CDCl}_3$ , 151 MHz)

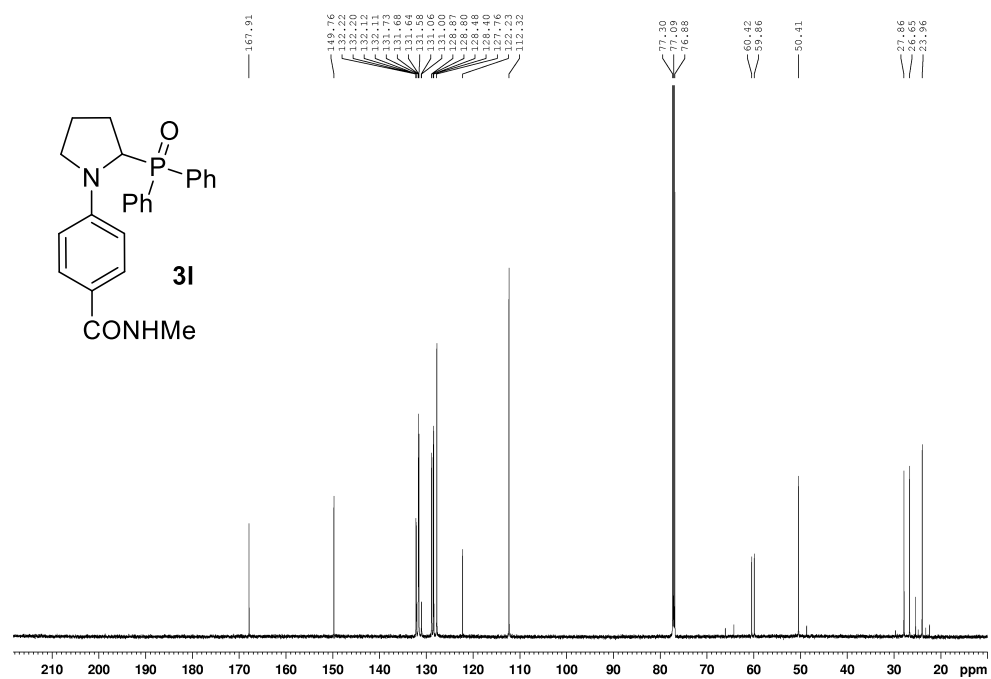

$^{31}\text{P}$  NMR of **3l** ( $\text{CDCl}_3$ , 243 MHz)

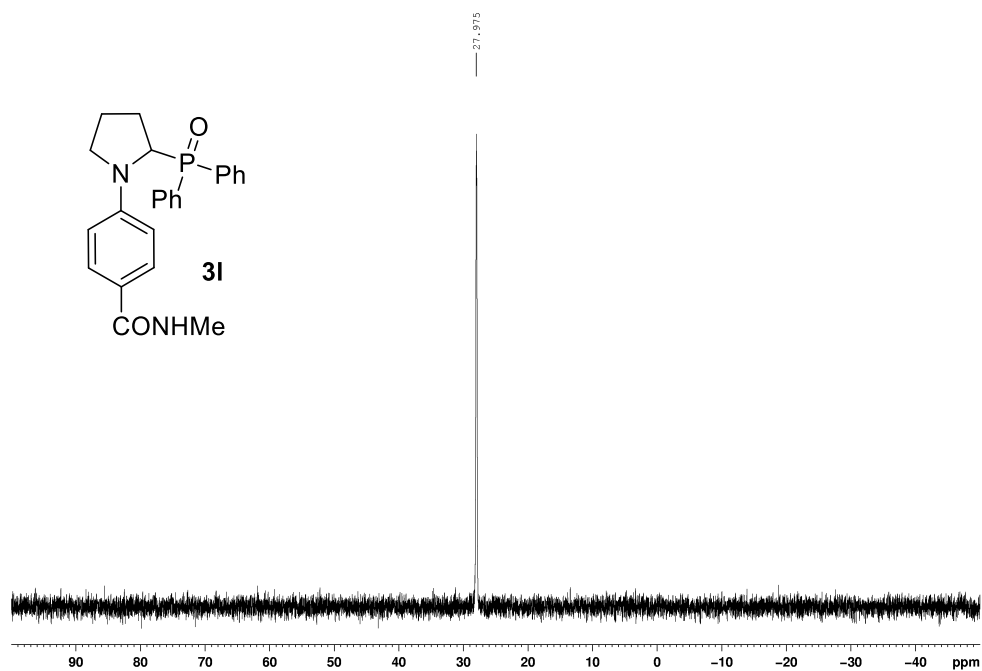

$^1\text{H}$  NMR of **3m** ( $\text{CDCl}_3$ , 400 MHz)

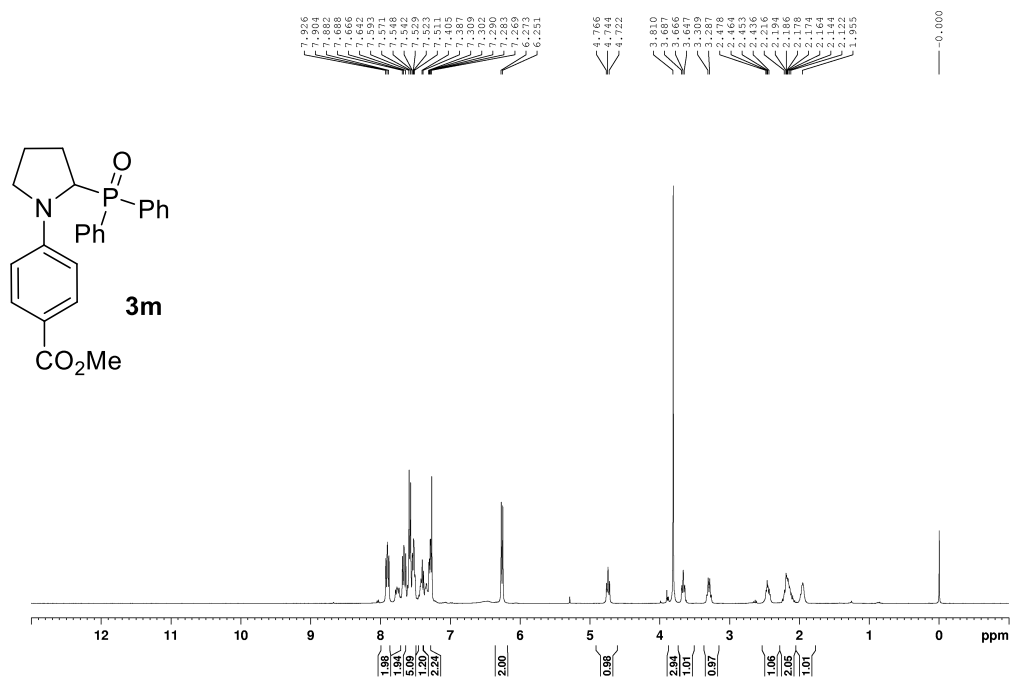







$^{31}\text{P}$  NMR of **3n** ( $\text{CDCl}_3$ , 162 MHz)

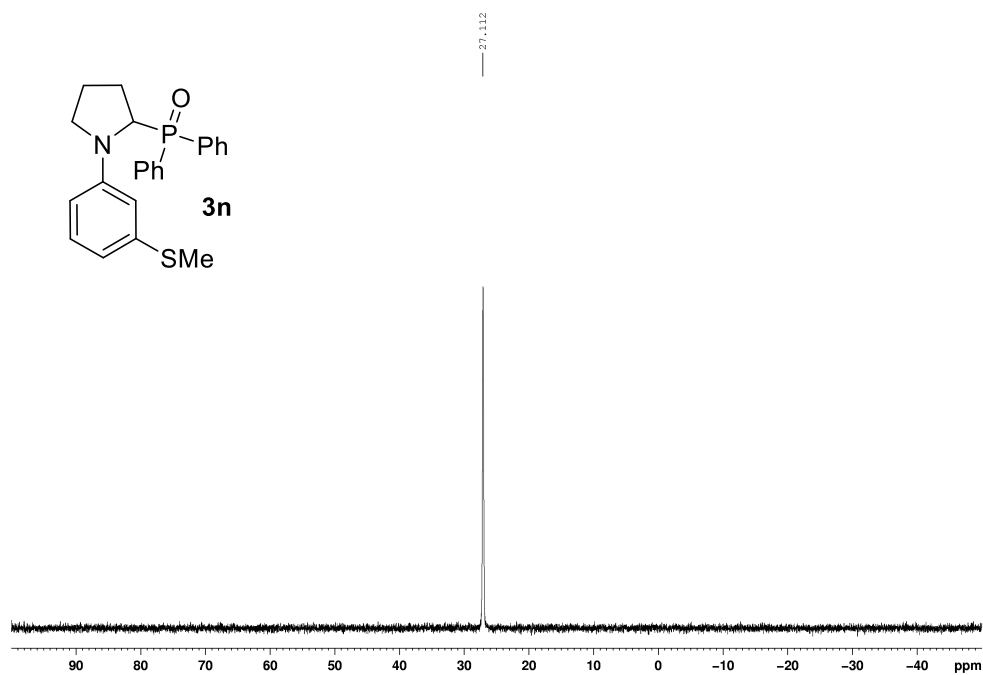

$^1\text{H}$  NMR of **3o** ( $\text{CDCl}_3$ , 400 MHz)

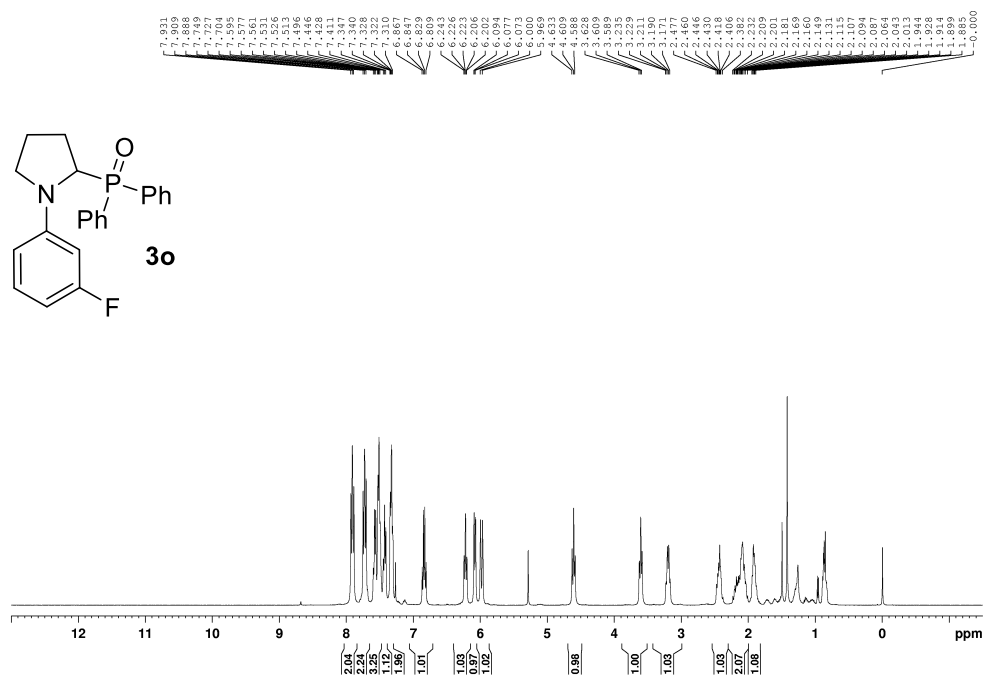

$^{13}\text{C}$  NMR of **3o** ( $\text{CDCl}_3$ , 101 MHz)

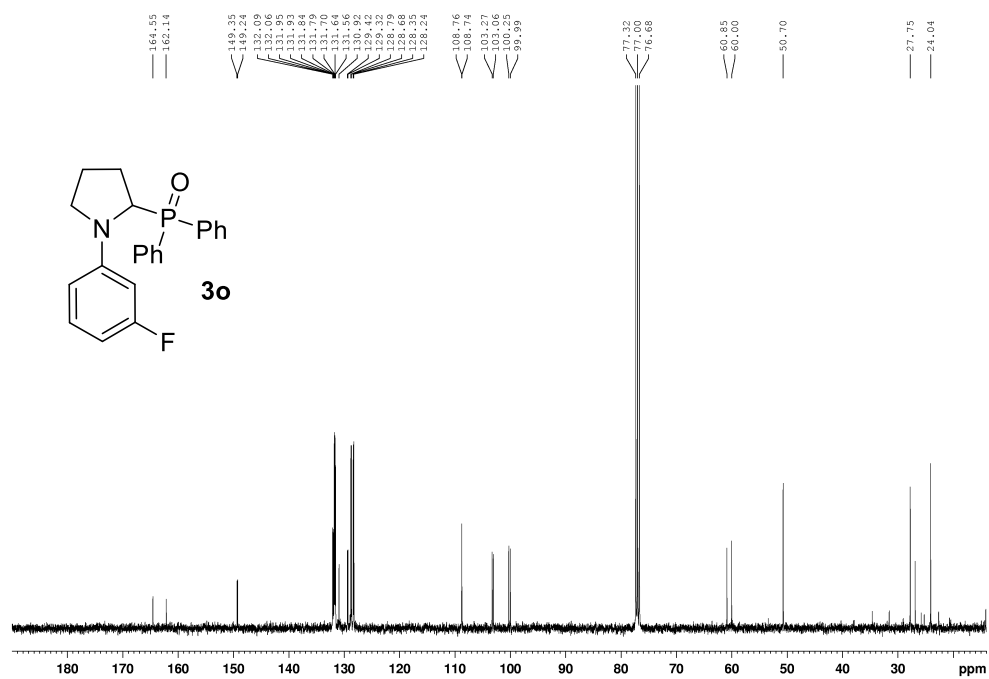

$^{31}\text{P}$  NMR of **3o** ( $\text{CDCl}_3$ , 162 MHz)

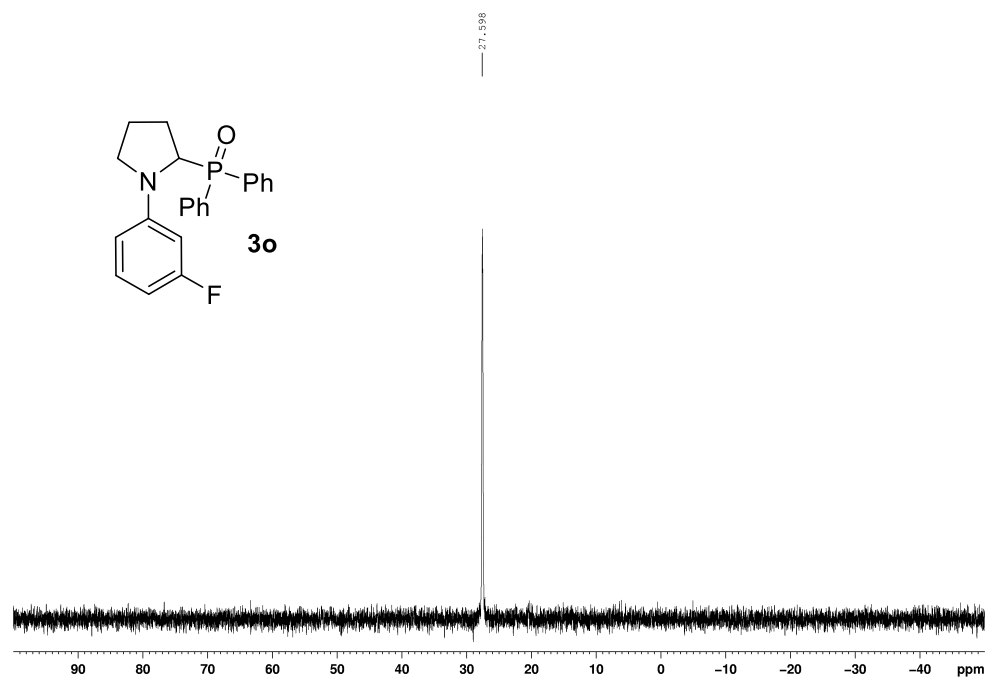

$^{19}\text{F}$  NMR of **3o** ( $\text{CDCl}_3$ , 376 MHz)

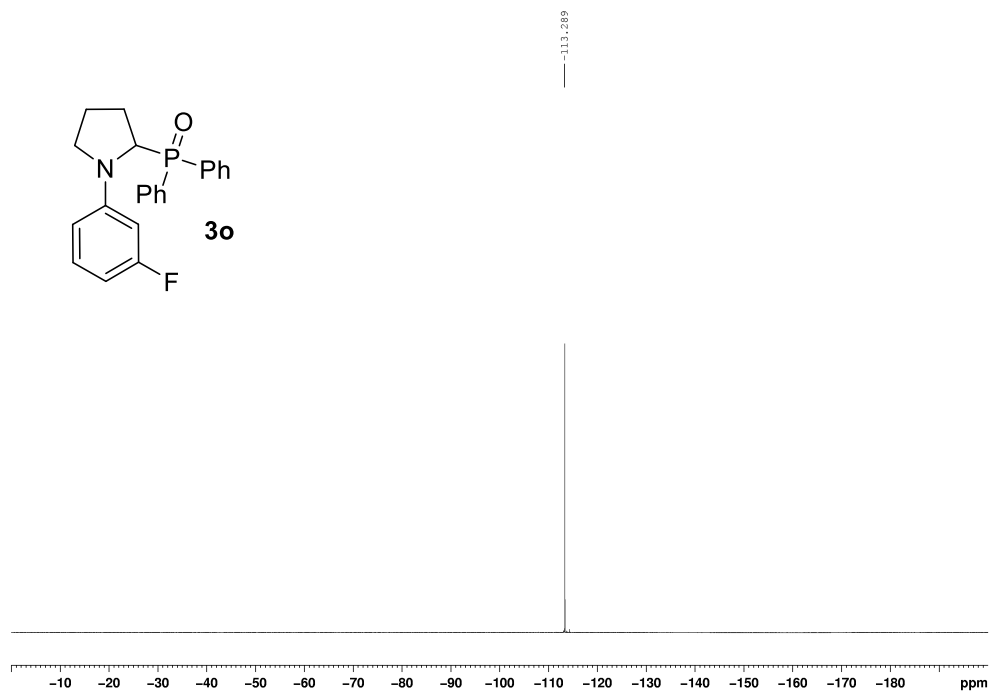

$^1\text{H}$  NMR of **3p** ( $\text{CDCl}_3$ , 400 MHz)

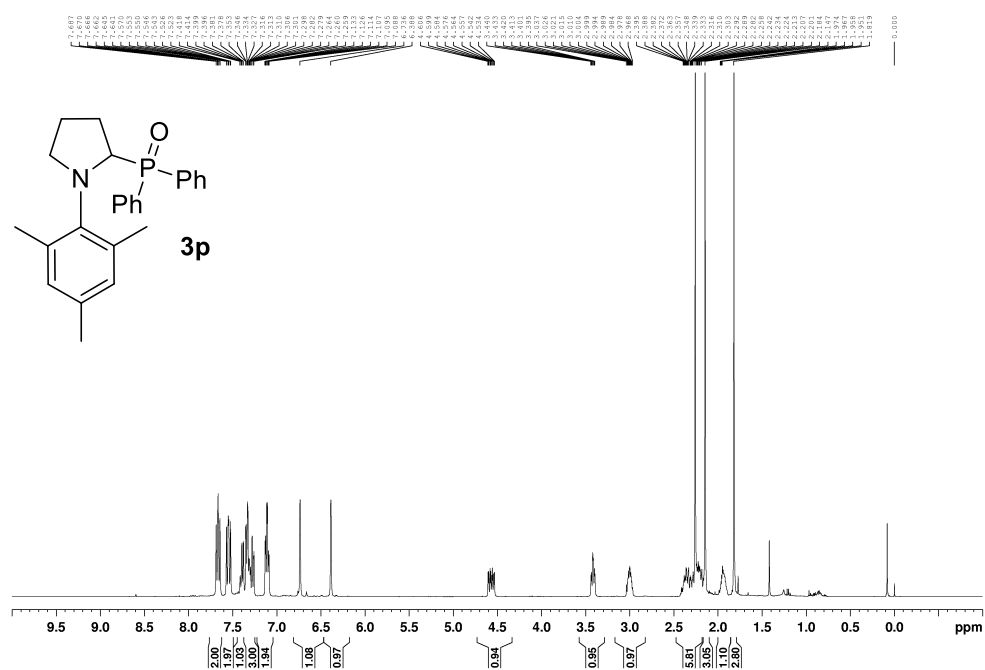

$^{13}\text{C}$  NMR of **3p** ( $\text{CDCl}_3$ , 101 MHz)

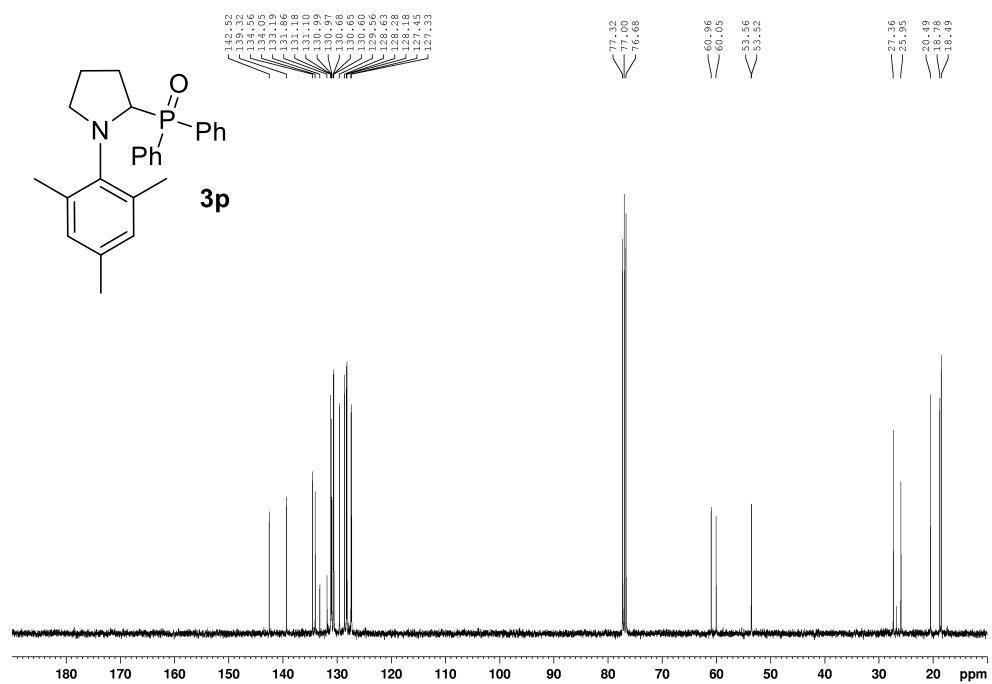

$^{31}\text{P}$  NMR of **3p** ( $\text{CDCl}_3$ , 162 MHz)

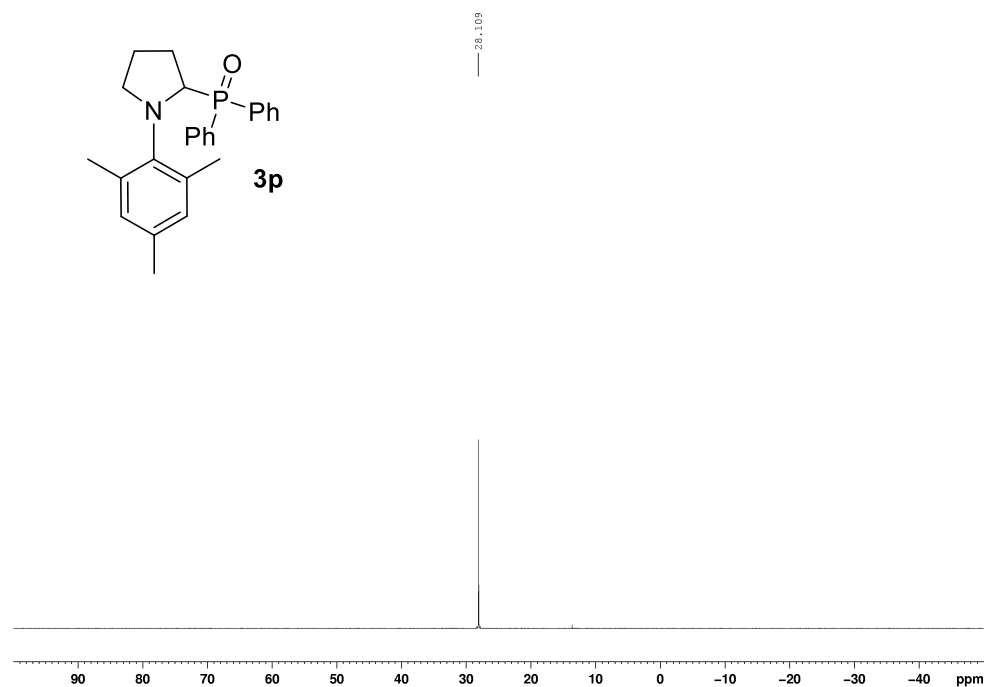



$^{31}\text{P}$  NMR of **3q** ( $\text{CDCl}_3$ , 162 MHz)

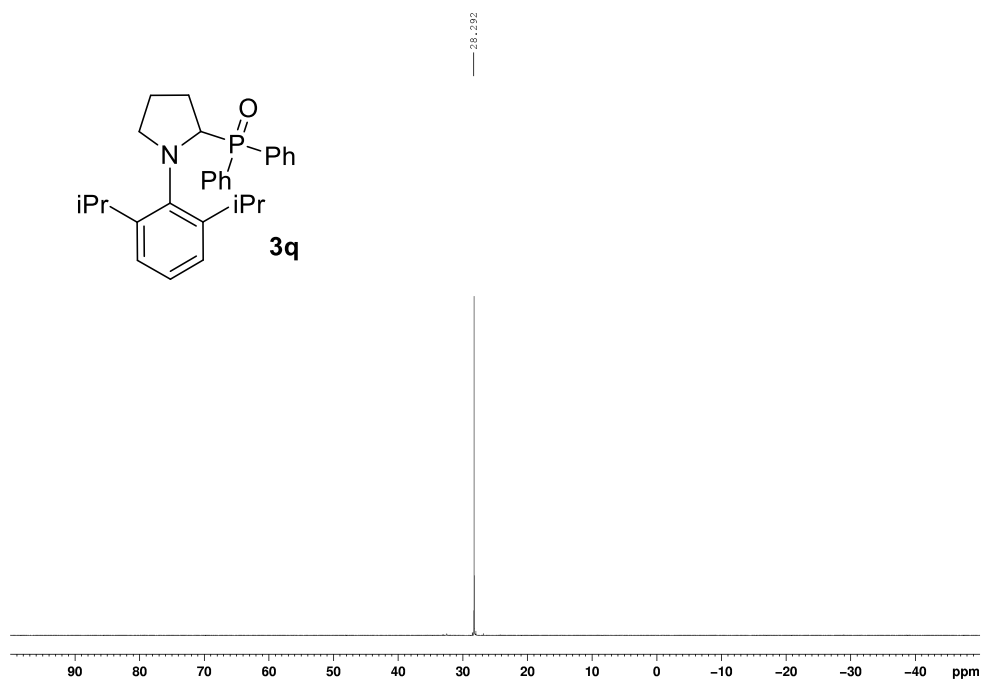

$^1\text{H}$  NMR of **3r** ( $\text{CDCl}_3$ , 600 MHz)

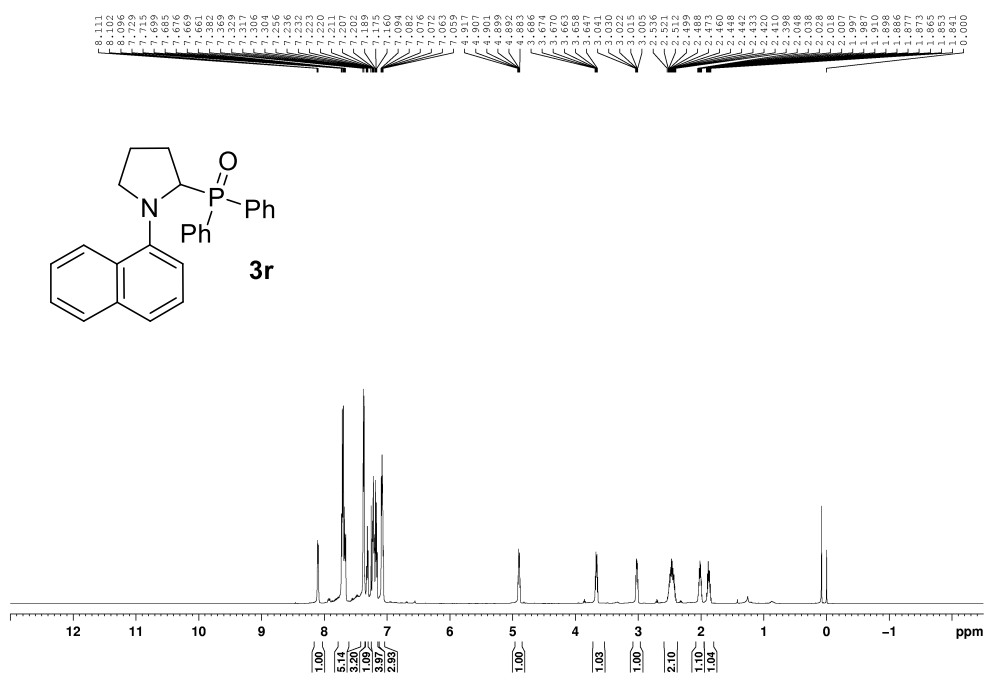

$^{13}\text{C}$  NMR of **3r** ( $\text{CDCl}_3$ , 151 MHz)

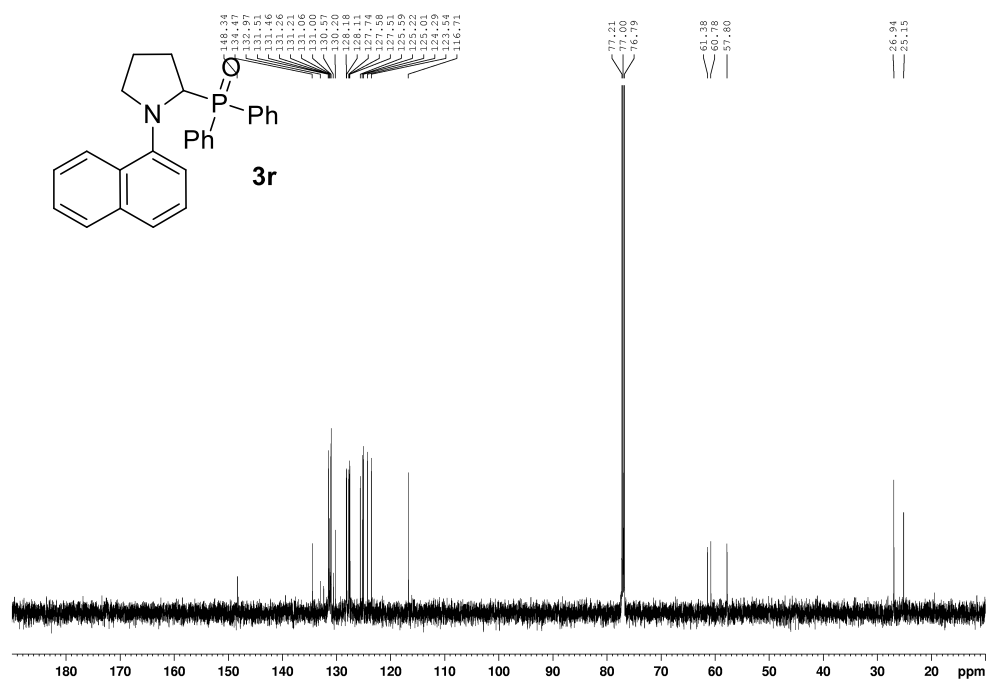

$^{31}\text{P}$  NMR of **3r** ( $\text{CDCl}_3$ , 243 MHz)

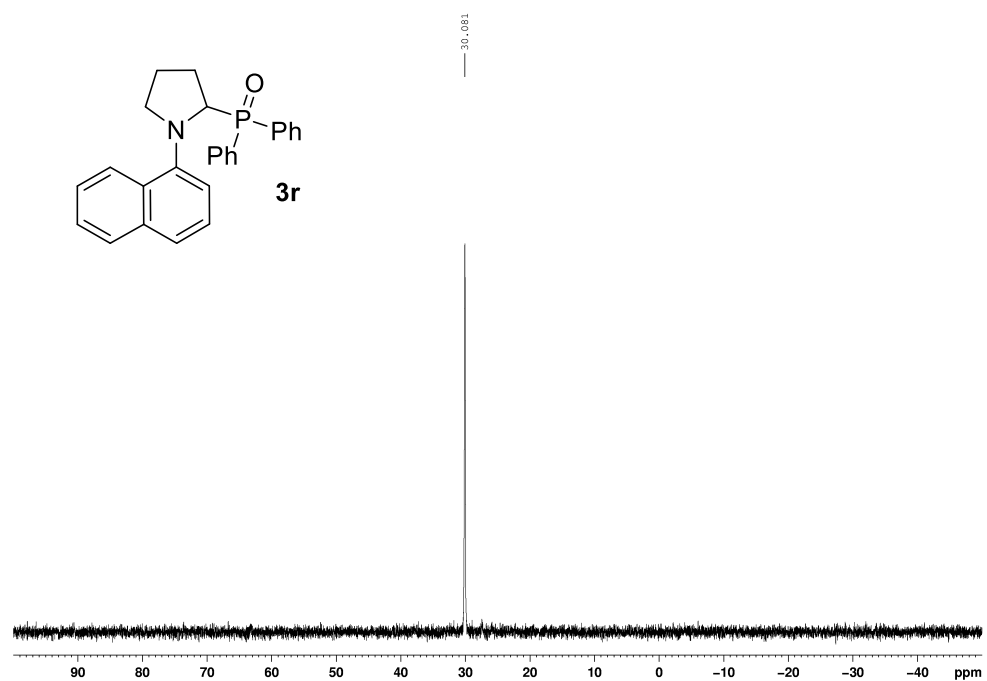

$^1\text{H}$  NMR of **3s** ( $\text{CDCl}_3$ , 400 MHz)

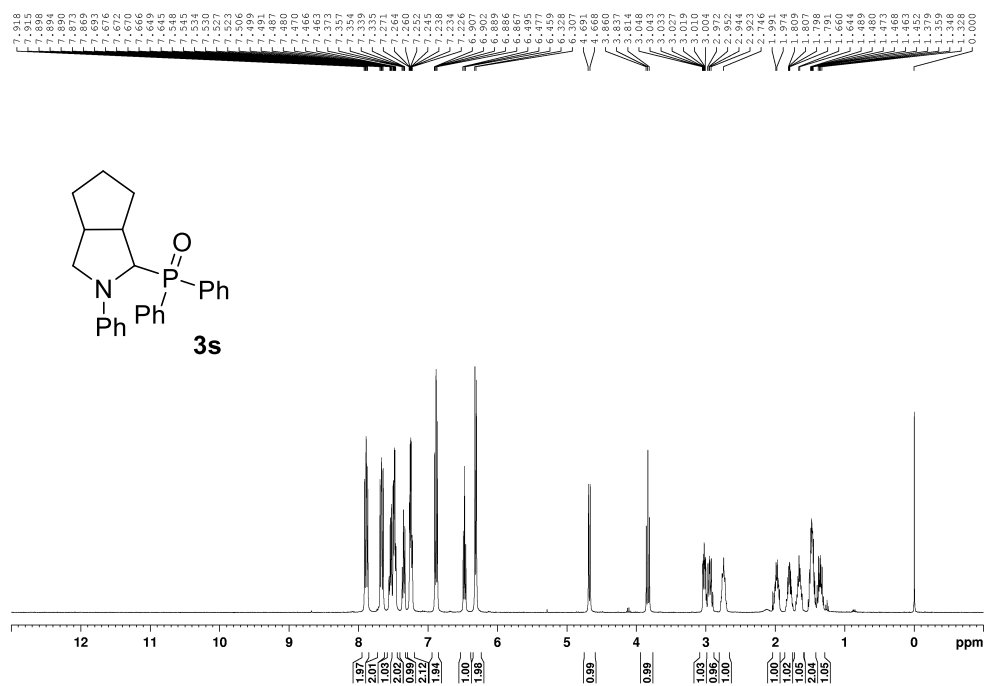

$^{13}\text{C}$  NMR of **3s** ( $\text{CDCl}_3$ , 101 MHz)

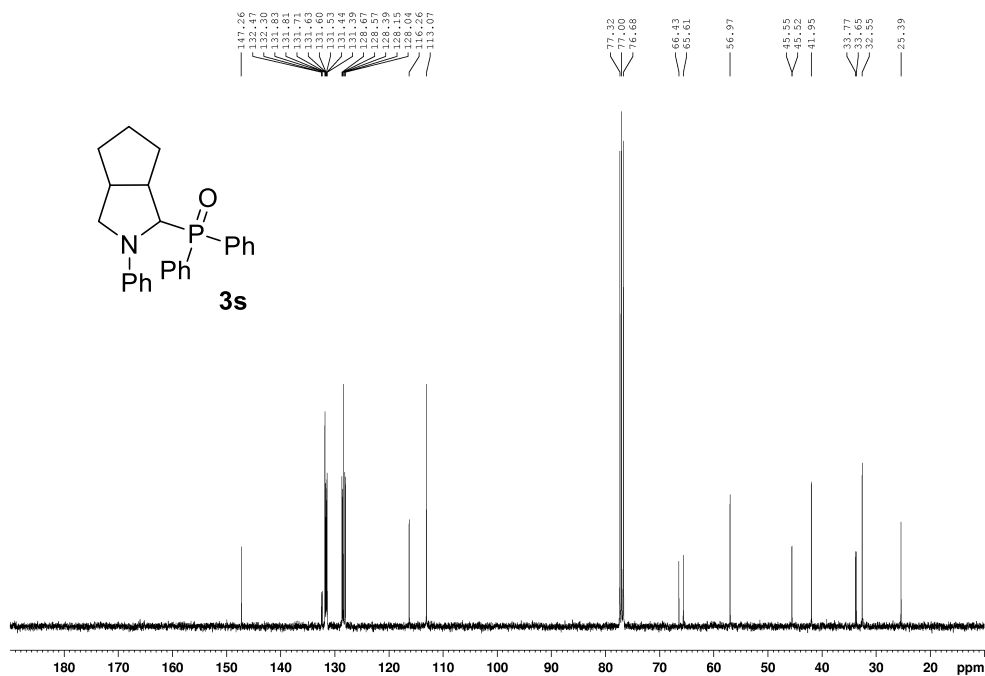



$^{31}\text{P}$  NMR of **3s** ( $\text{CDCl}_3$ , 162 MHz)

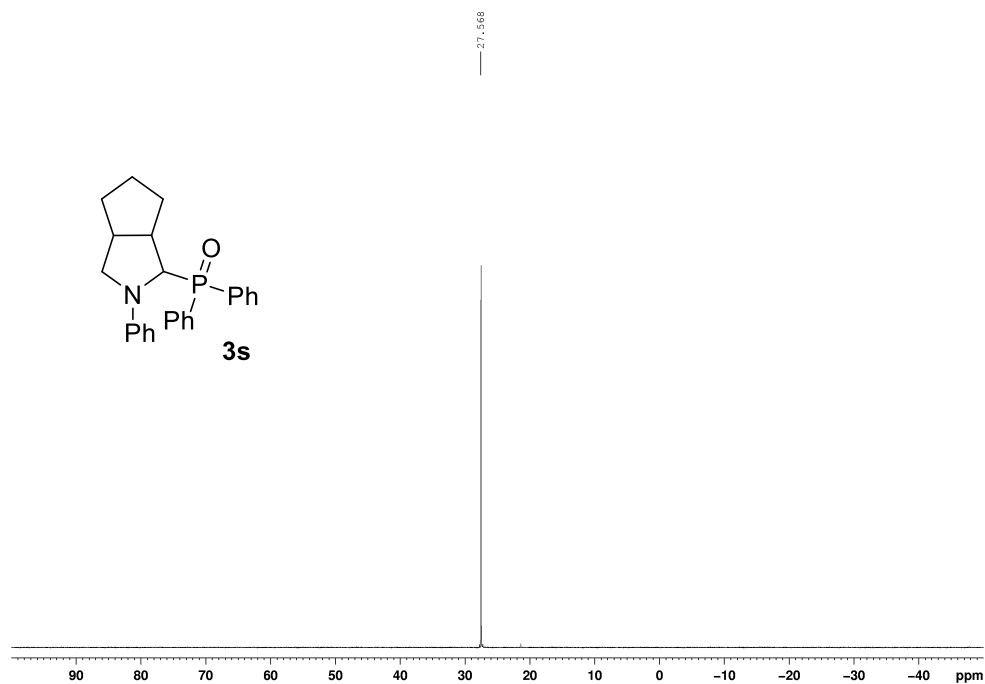

$^1\text{H}$  NMR of **3t** ( $\text{CDCl}_3$ , 400 MHz)

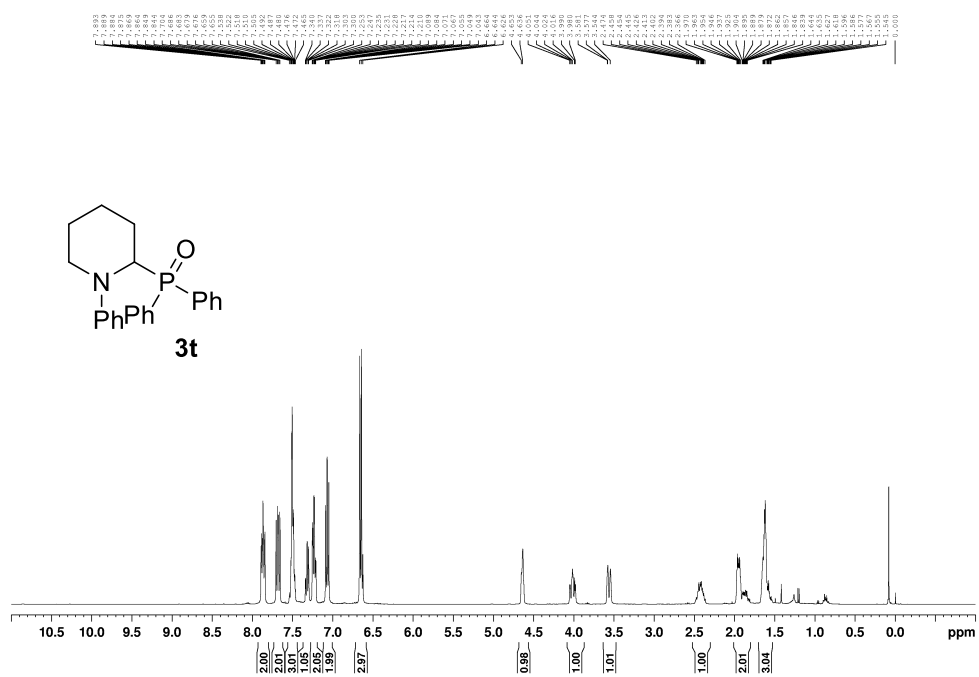

$^{13}\text{C}$  NMR of **3t** ( $\text{CDCl}_3$ , 101 MHz)

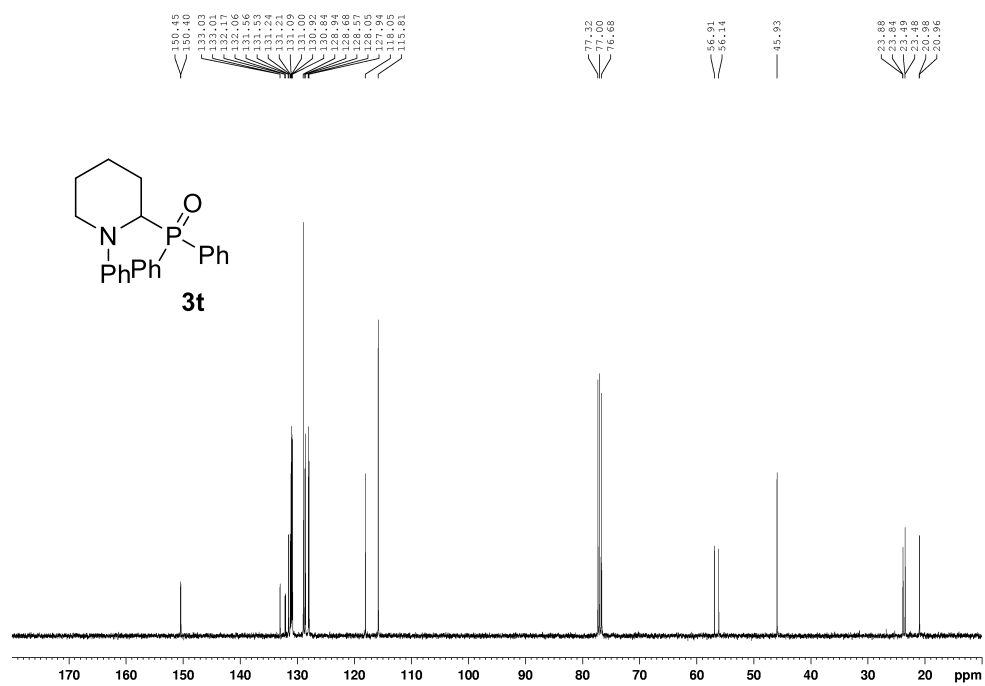

$^{31}\text{P}$  NMR of **3t** ( $\text{CDCl}_3$ , 162 MHz)

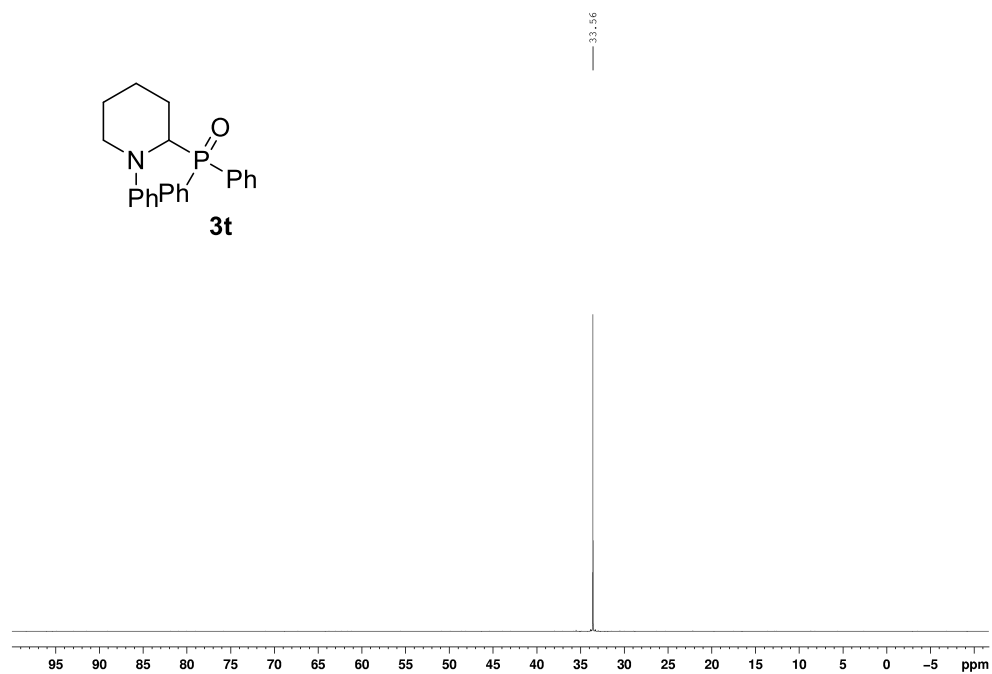

$^1\text{H}$  NMR of **3u** ( $\text{CDCl}_3$ , 400 MHz)

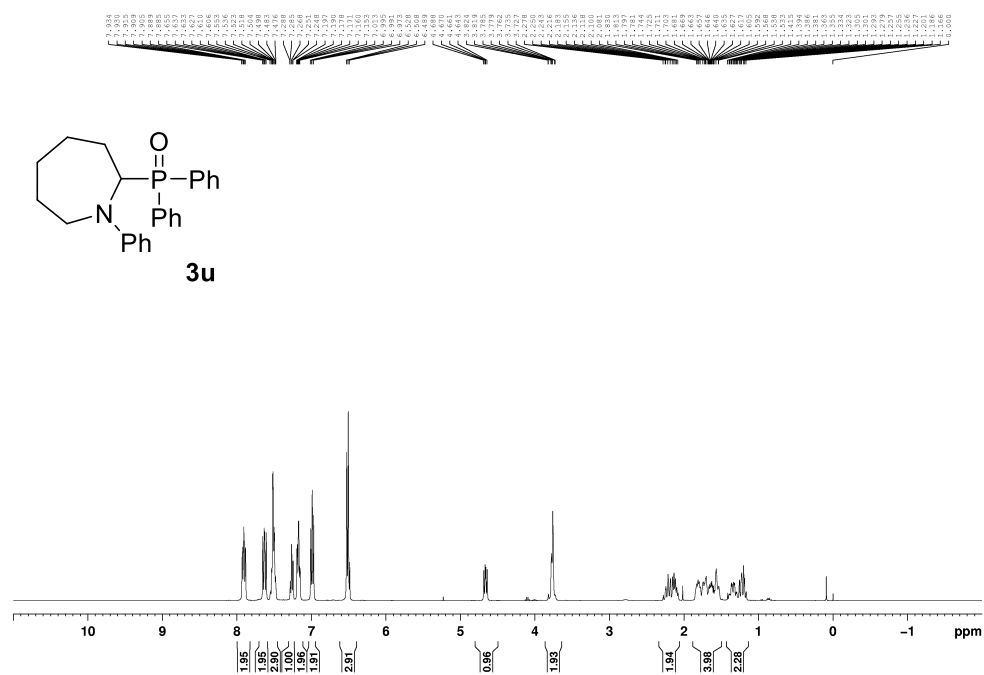

$^{13}\text{C}$  NMR of **3u** ( $\text{CDCl}_3$ , 101 MHz)

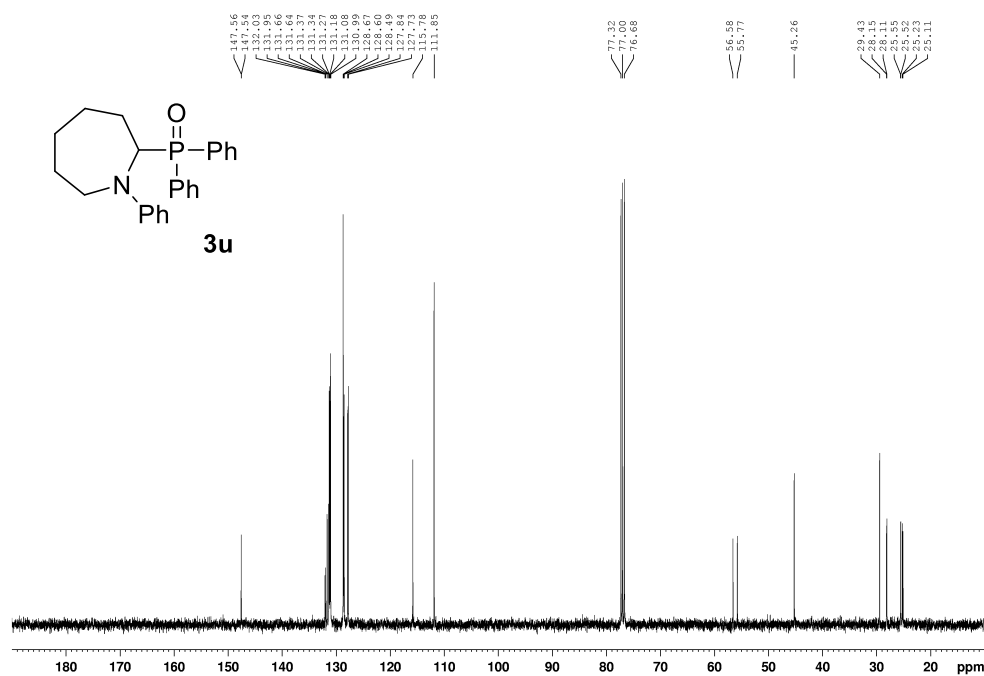

$^{31}\text{P}$  NMR of **3u** ( $\text{CDCl}_3$ , 162 MHz)

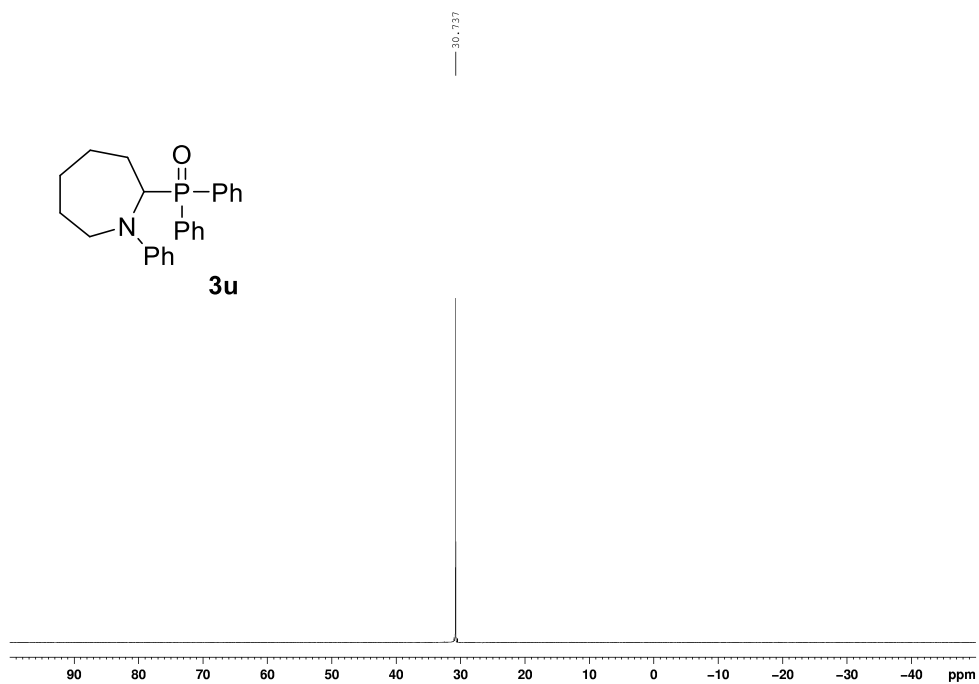

$^1\text{H}$  NMR of **3v** ( $\text{CDCl}_3$ , 400 MHz)

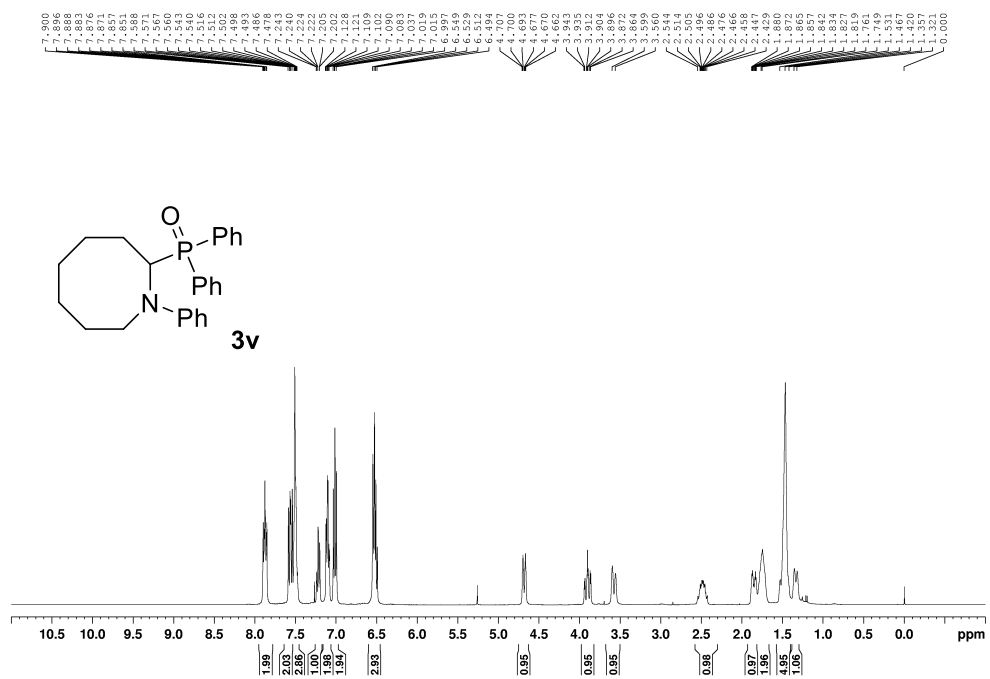

$^{13}\text{C}$  NMR of **3v** ( $\text{CDCl}_3$ , 101 MHz)

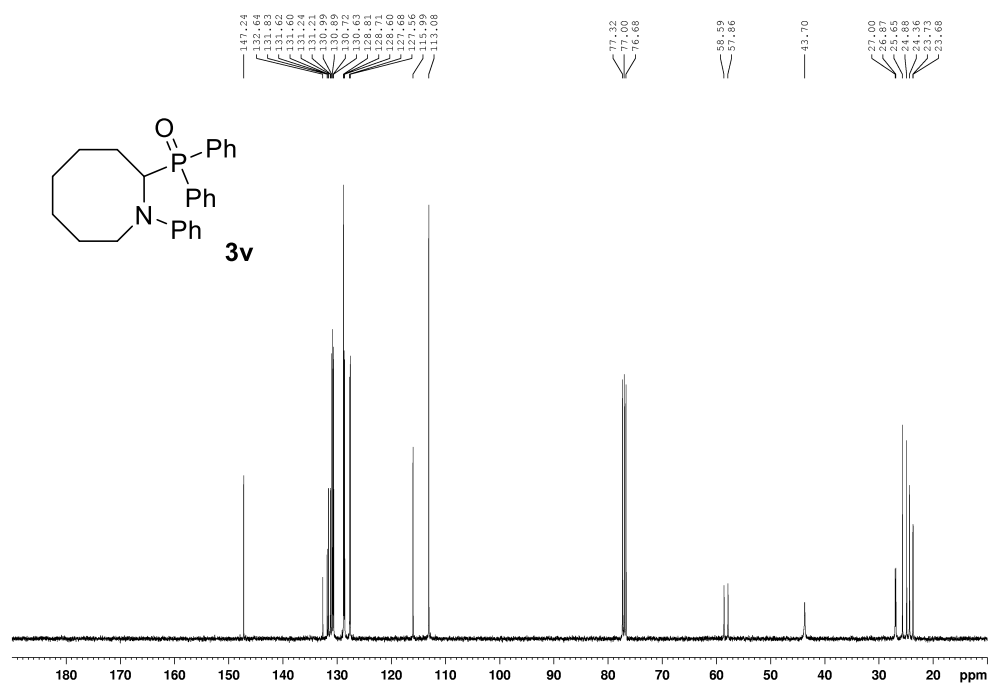

$^{31}\text{P}$  NMR of **3v** ( $\text{CDCl}_3$ , 162 MHz)

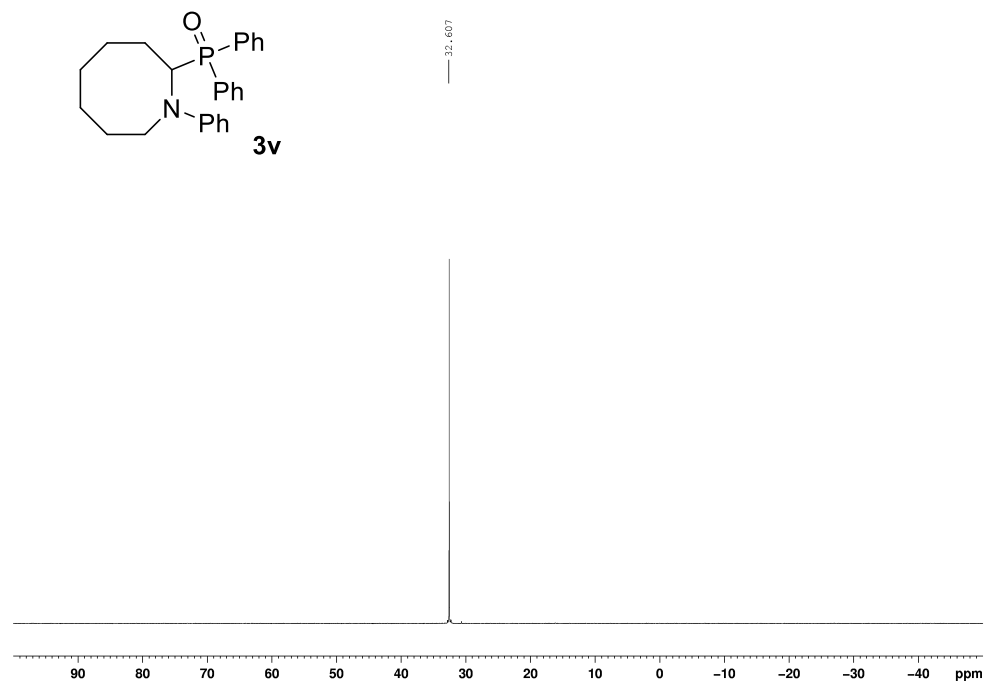

$^1\text{H}$  NMR of **3w** ( $\text{CDCl}_3$ , 400 MHz)

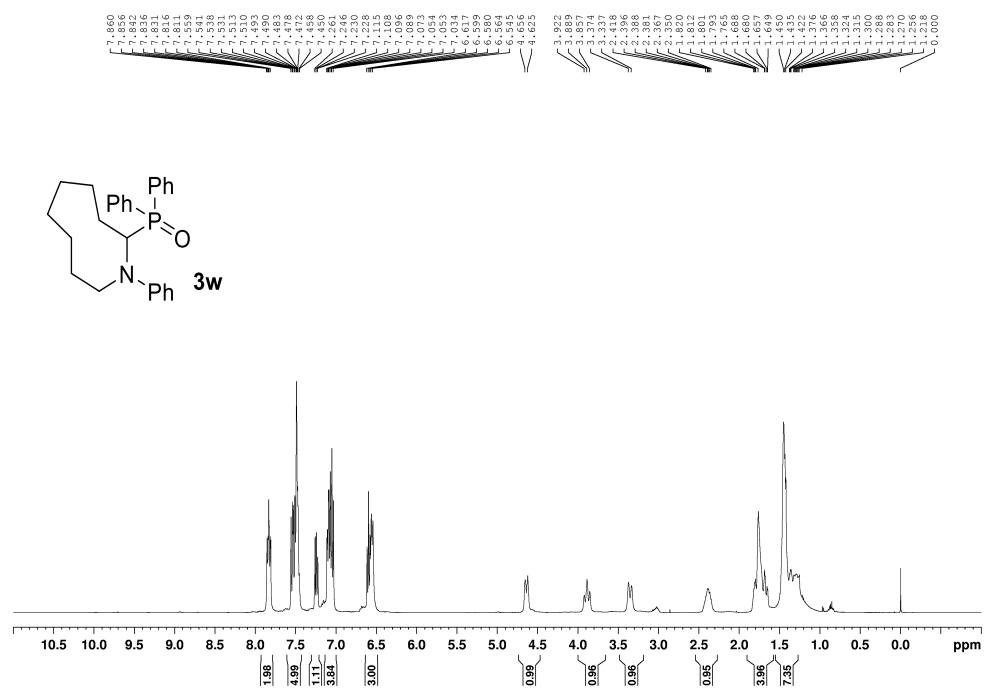

$^{13}\text{C}$  NMR of **3w** ( $\text{CDCl}_3$ , 101 MHz)

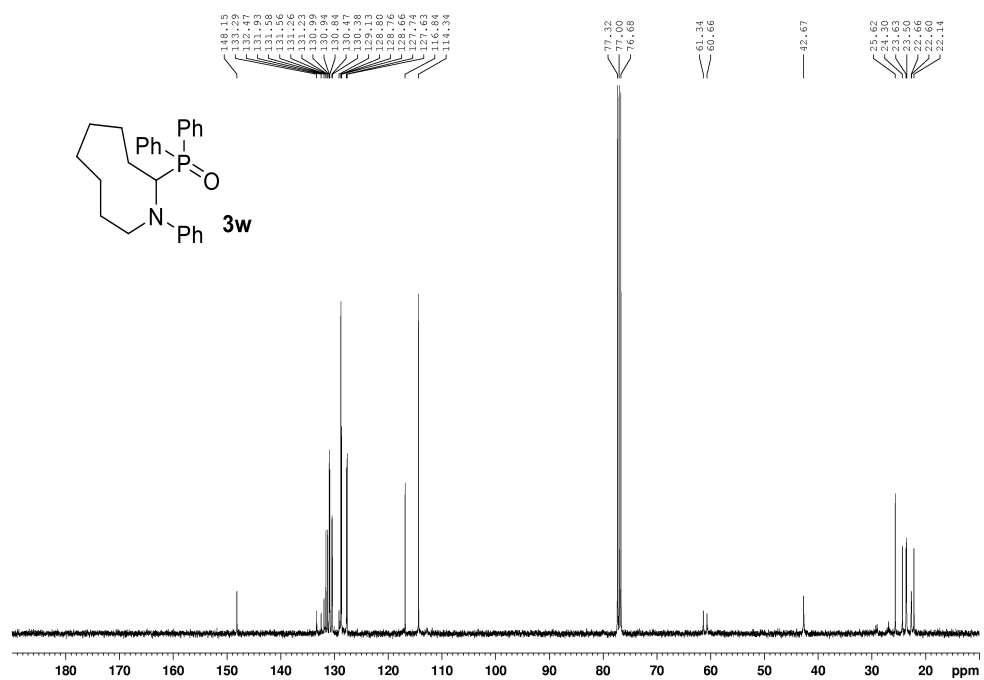

$^{31}\text{P}$  NMR of **3w** ( $\text{CDCl}_3$ , 162 MHz)

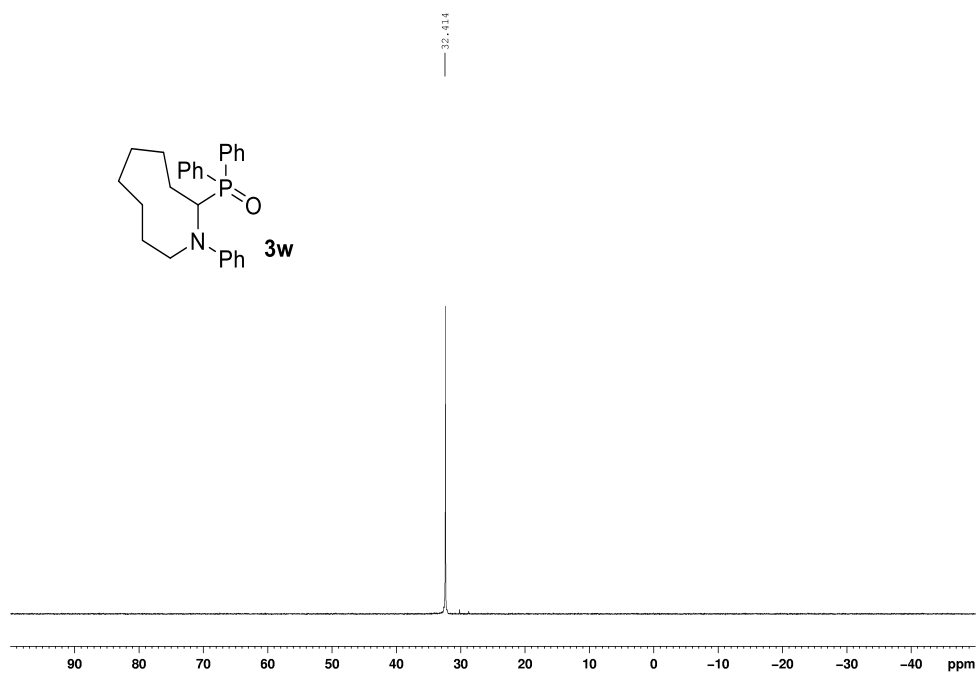

$^1\text{H}$  NMR of **3x** (major) ( $\text{CDCl}_3$ , 400 MHz)

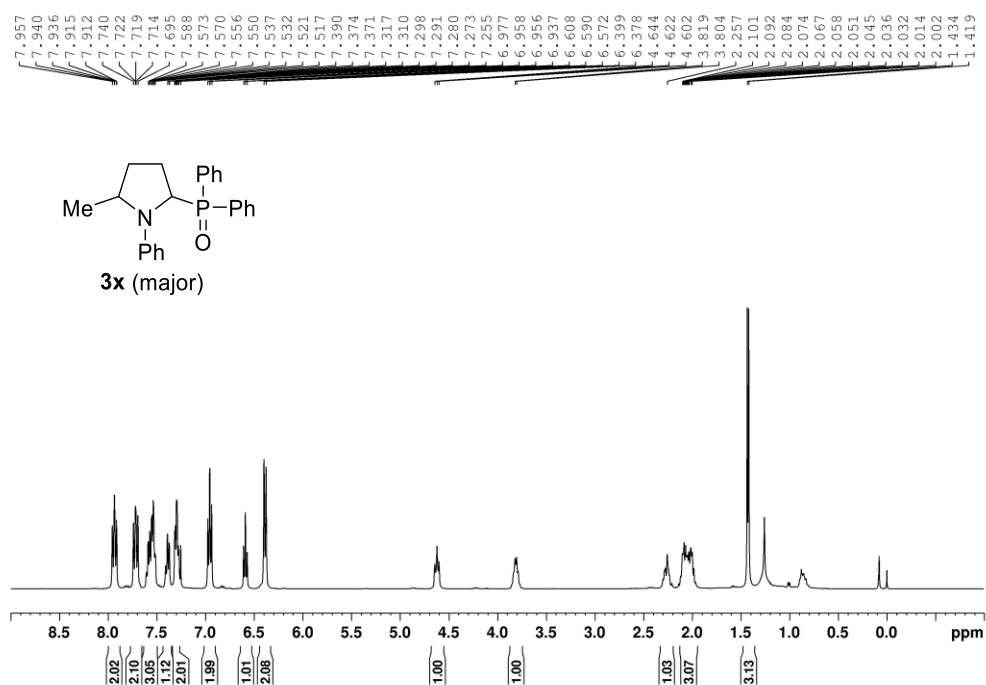

$^{13}\text{C}$  NMR of **3x** (major) ( $\text{CDCl}_3$ , 101 MHz)

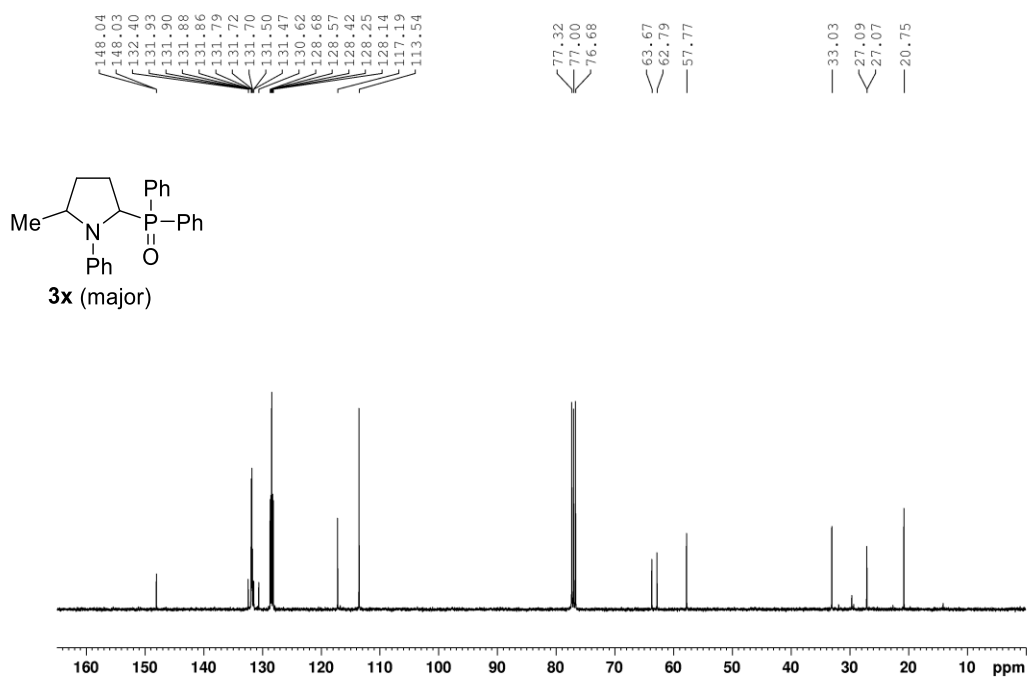

$^{31}\text{P}$  NMR of **3x** (major) ( $\text{CDCl}_3$ , 162 MHz)

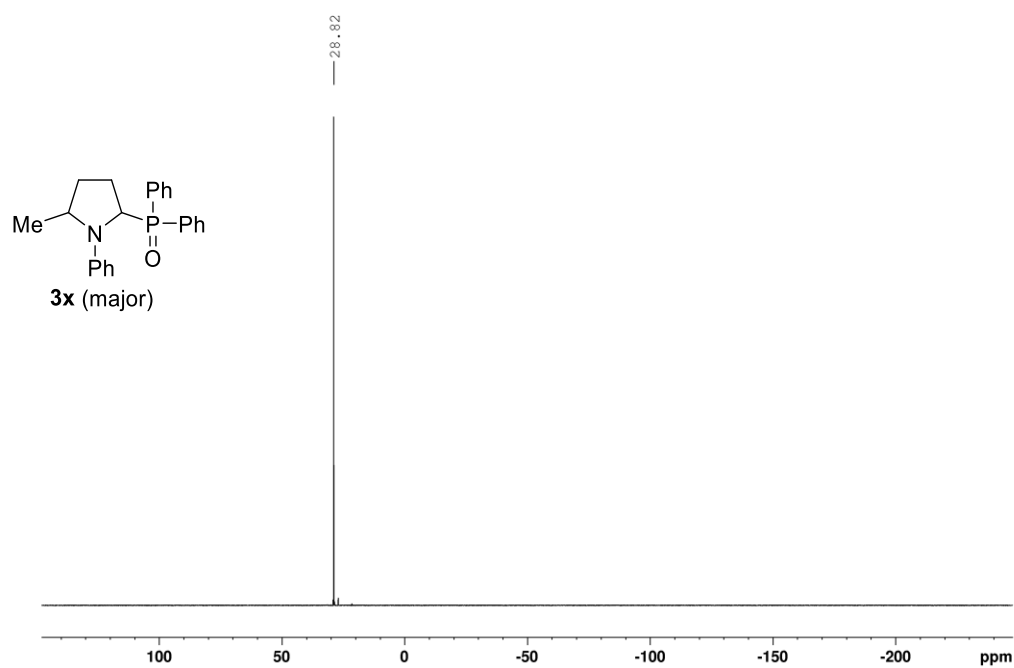



$^1\text{H}$  NMR of **3x** (minor) ( $\text{CDCl}_3$ , 400 MHz)

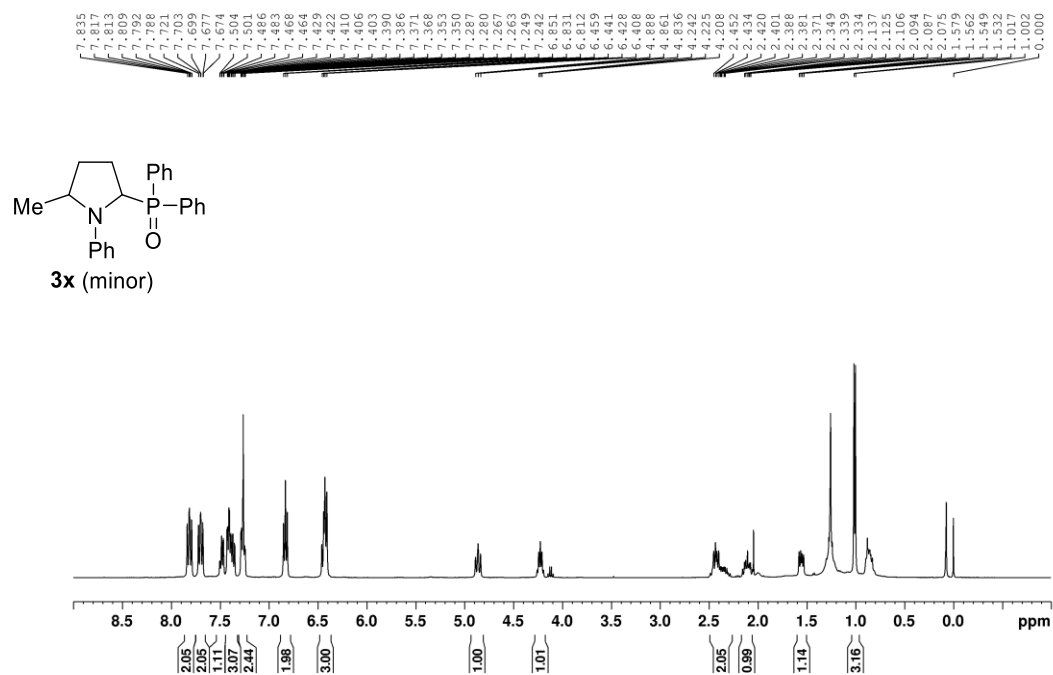

$^{13}\text{C}$  NMR of **3x** (minor) ( $\text{CDCl}_3$ , 101 MHz)

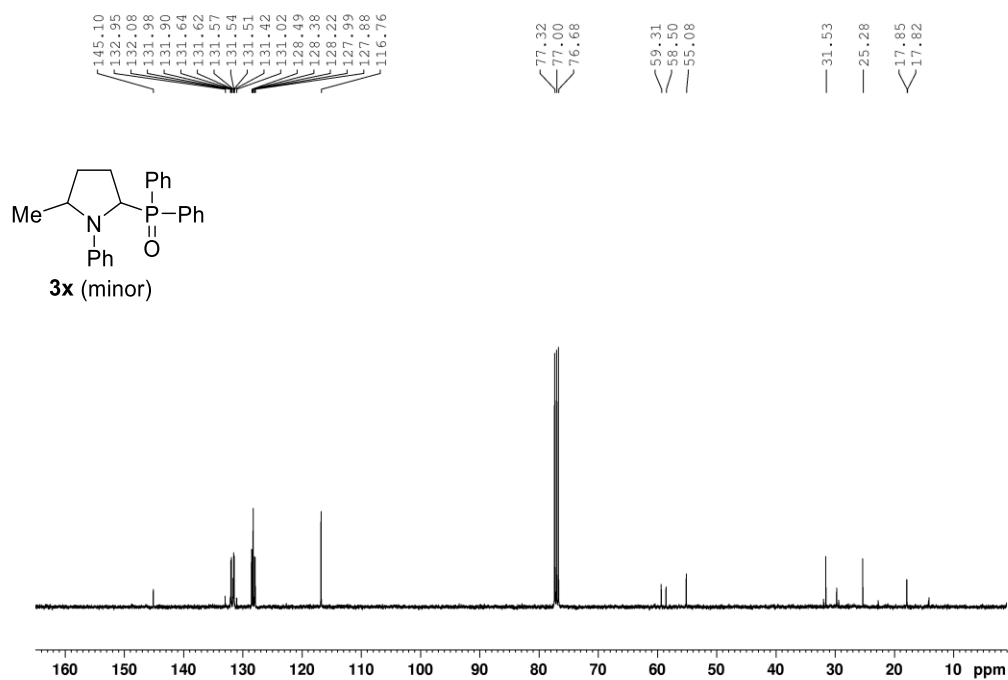

$^{31}\text{P}$  NMR of **3x** (minor) ( $\text{CDCl}_3$ , 162 MHz)

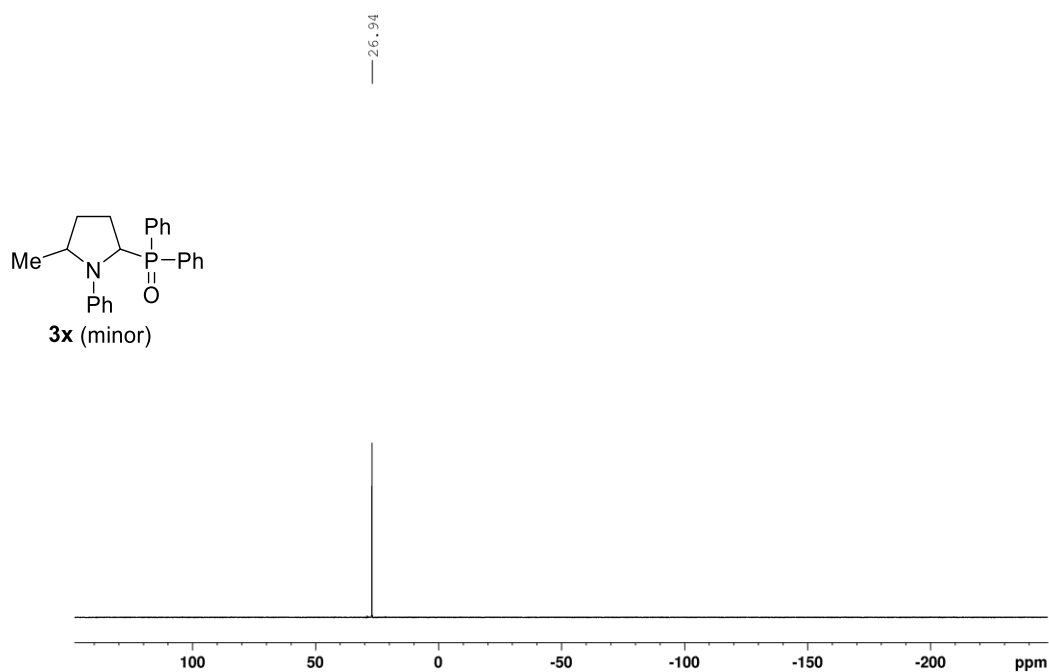

$^1\text{H}$  NMR of **3y** ( $\text{CDCl}_3$ , 600 MHz)

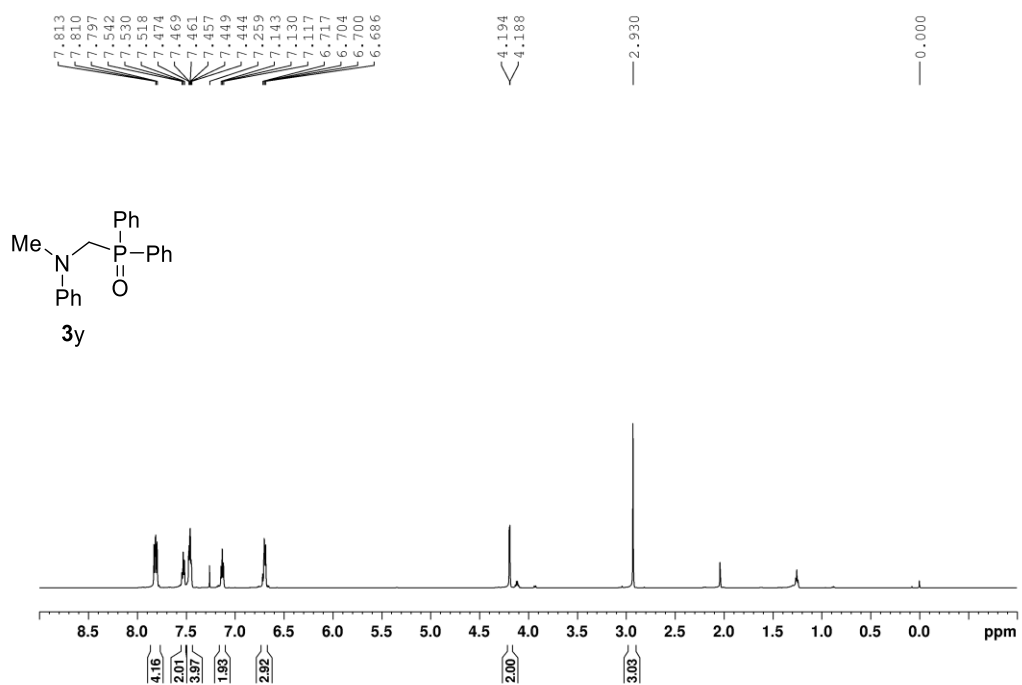

$^{13}\text{C}$  NMR of **3y** ( $\text{CDCl}_3$ , 151 MHz)

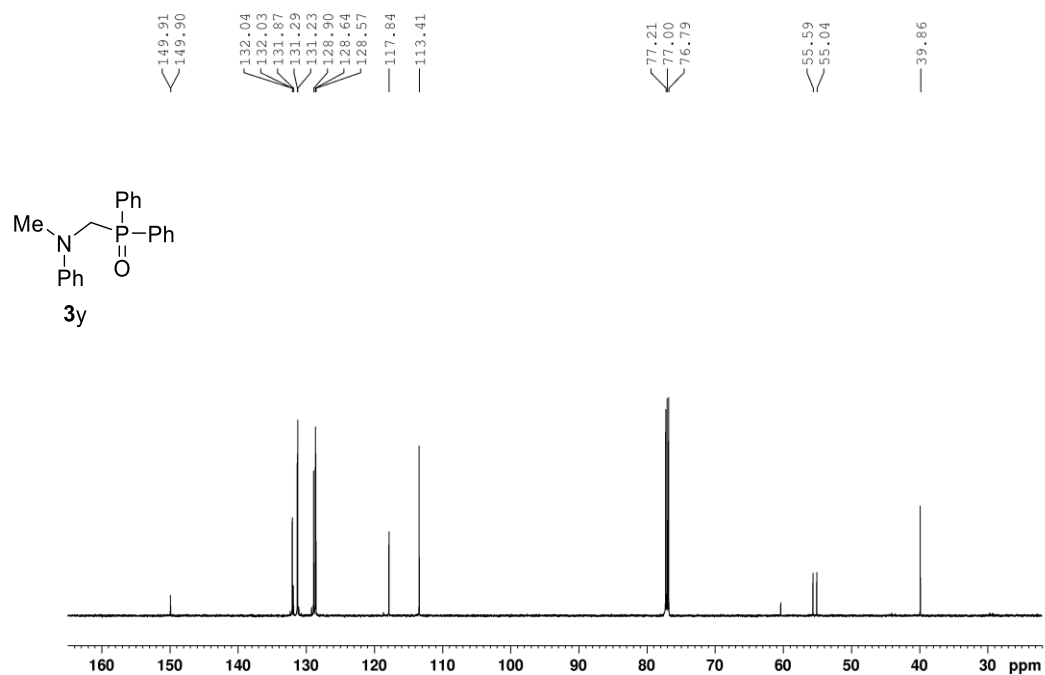

$^{31}\text{P}$  NMR of **3y** ( $\text{CDCl}_3$ , 243 MHz)

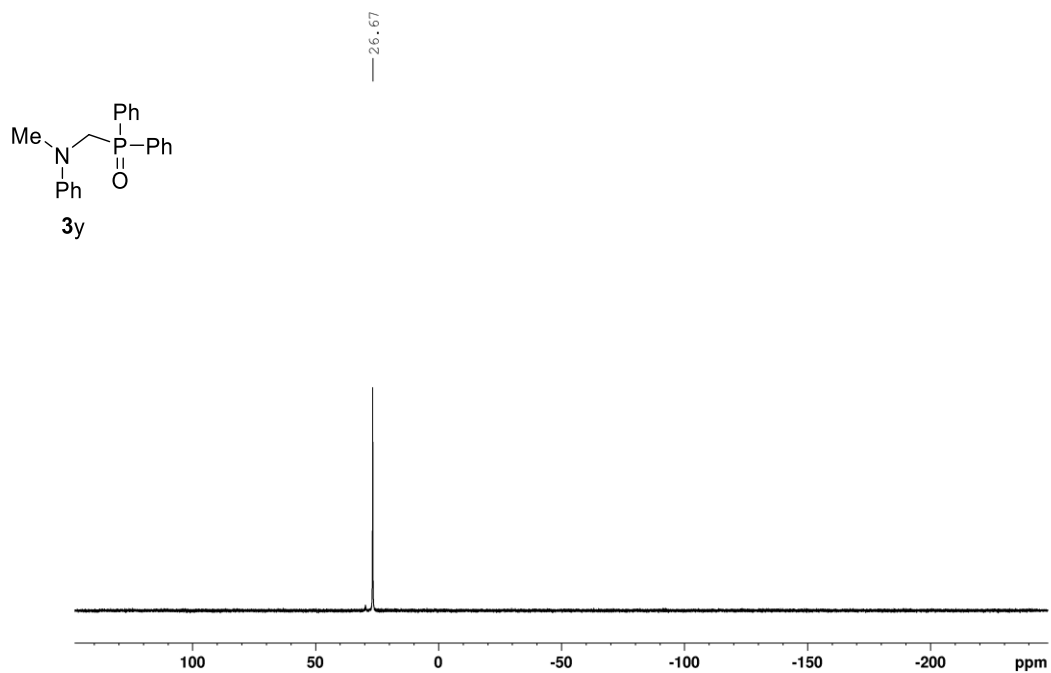

$^1\text{H}$  NMR of **4a** ( $\text{CDCl}_3$ , 400 MHz)

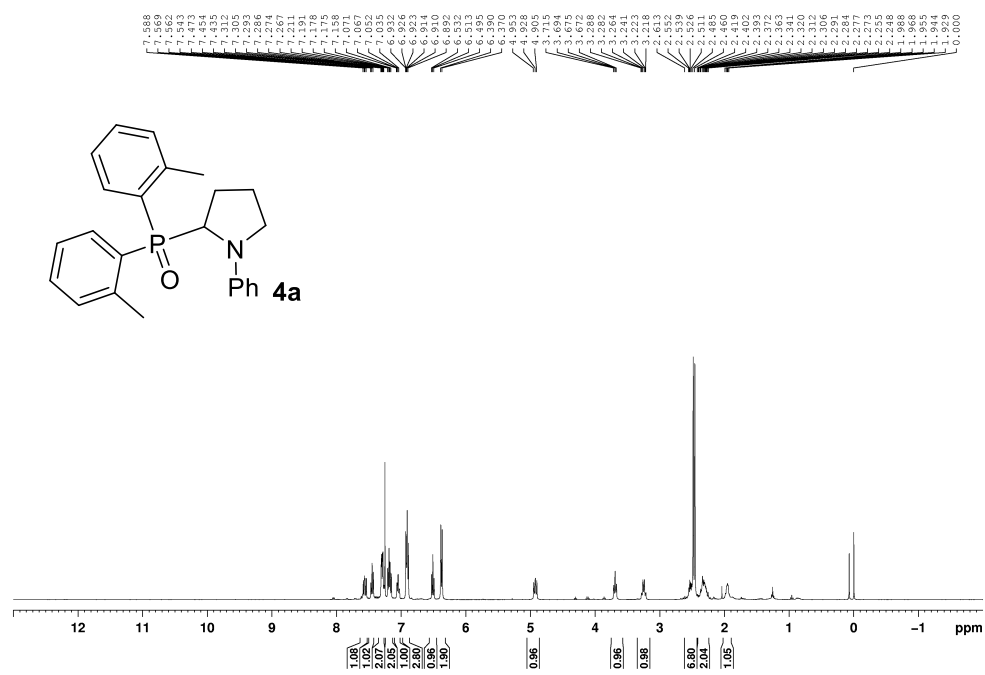

$^{13}\text{C}$  NMR of **4a** ( $\text{CDCl}_3$ , 101 MHz)

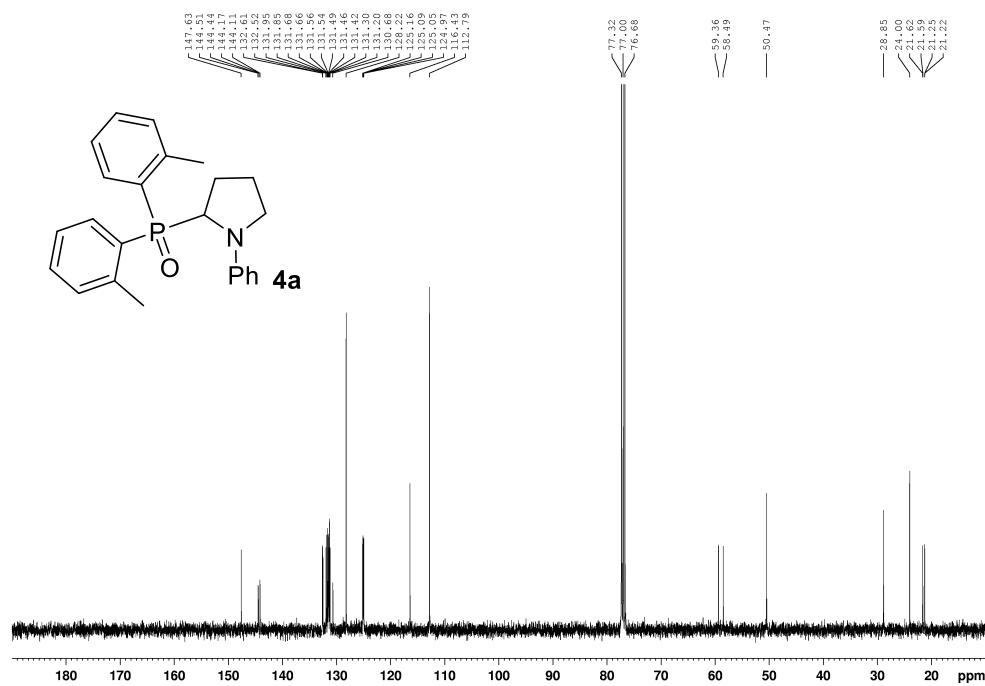

$^{31}\text{P}$  NMR of **4a** ( $\text{CDCl}_3$ , 162 MHz)

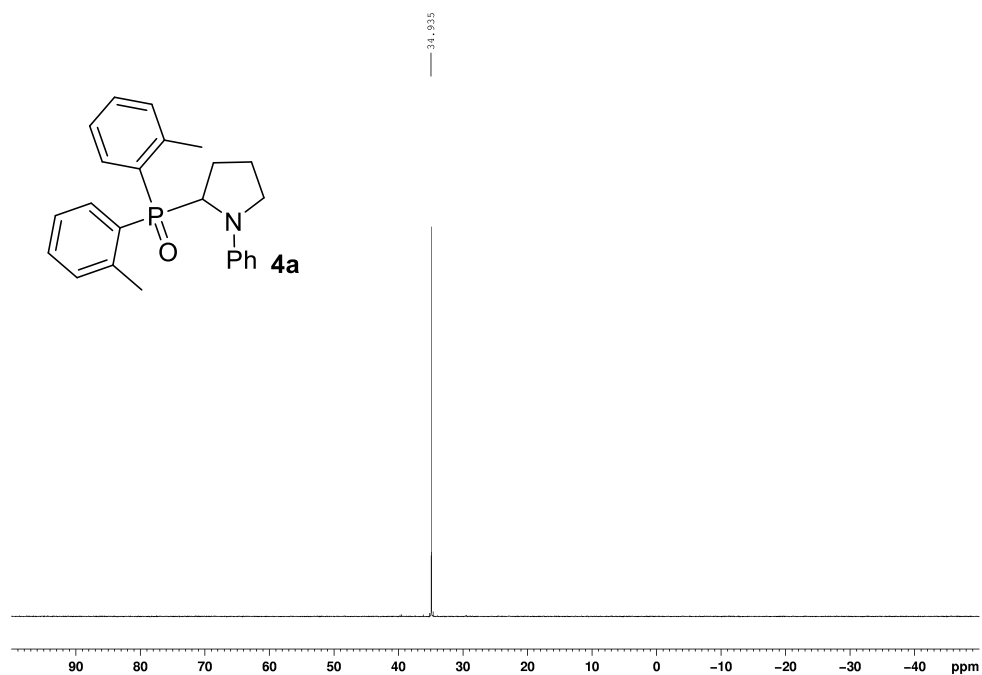

$^1\text{H}$  NMR of **4b** ( $\text{CDCl}_3$ , 600 MHz)

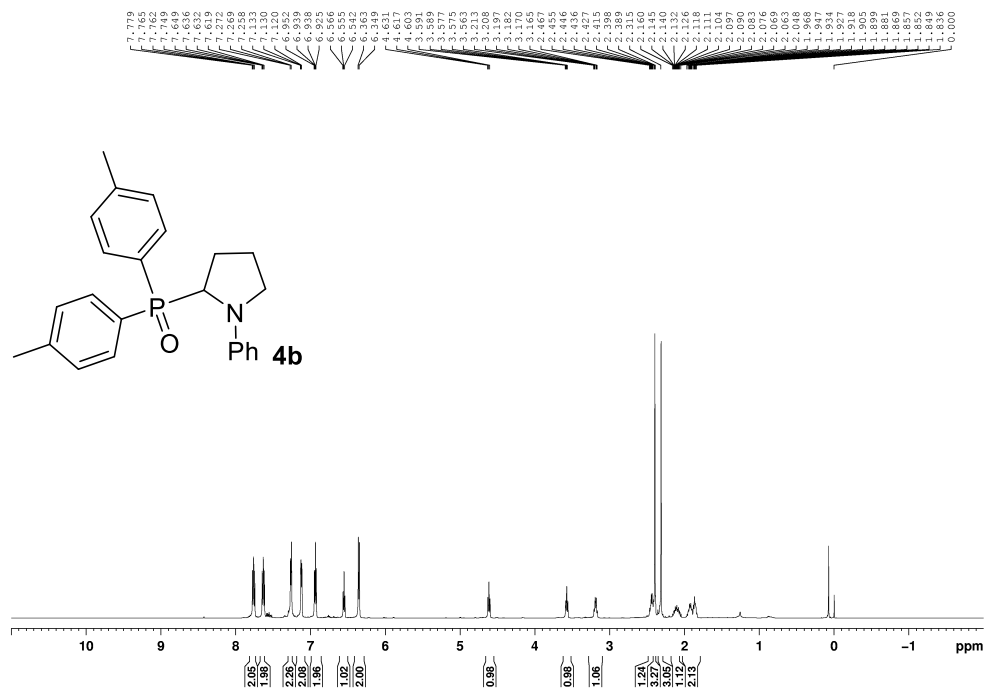

$^{13}\text{C}$  NMR of **4b** ( $\text{CDCl}_3$ , 151 MHz)

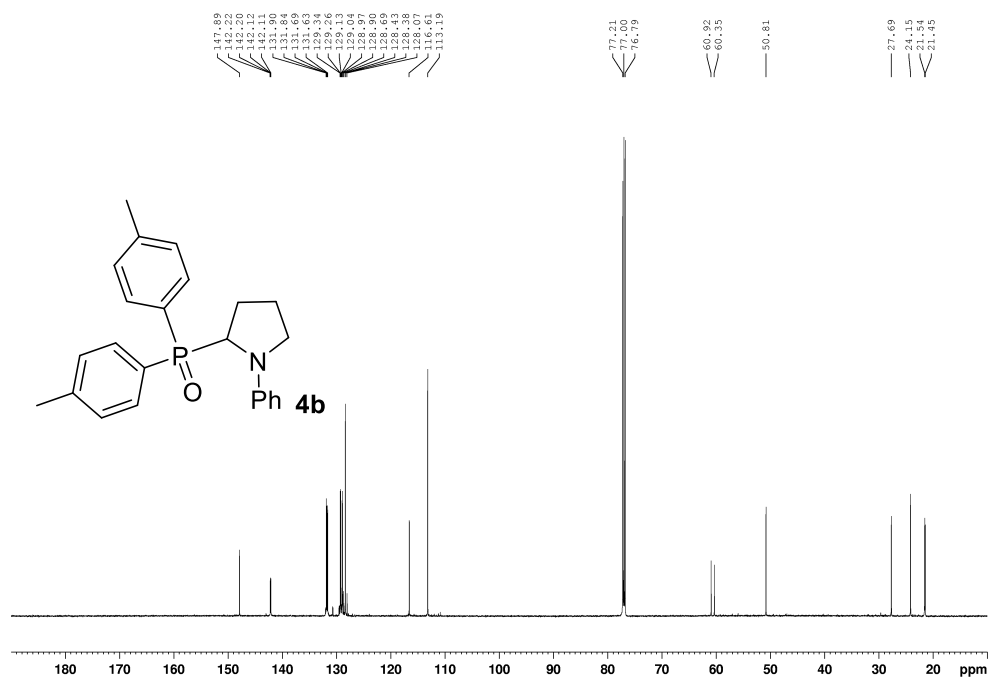

$^{31}\text{P}$  NMR of **4b** ( $\text{CDCl}_3$ , 243 MHz)

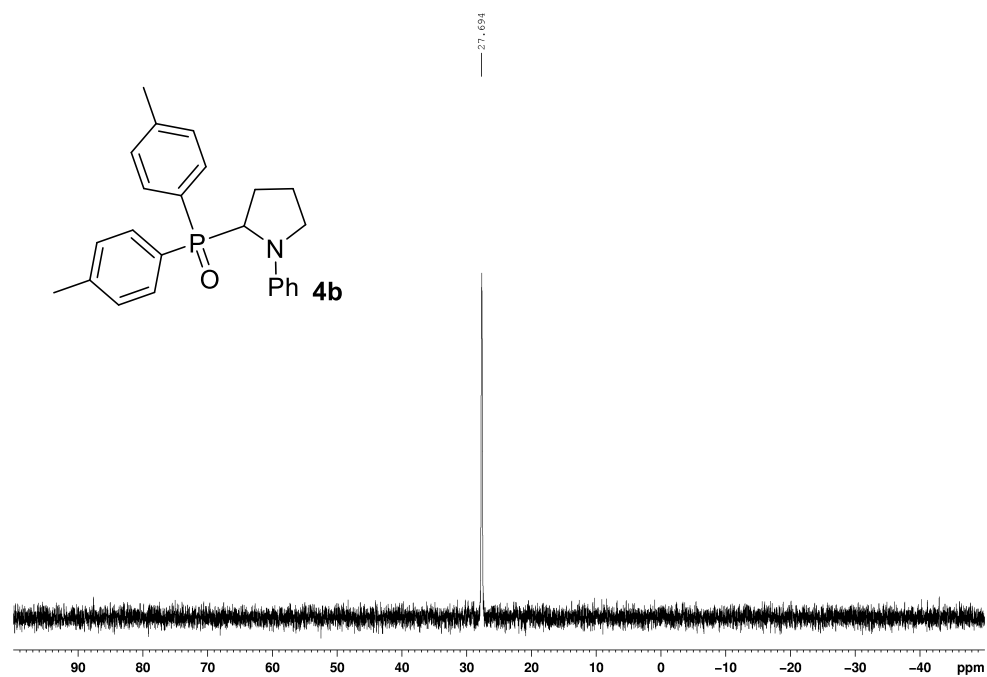

$^1\text{H}$  NMR of **4c** ( $\text{CDCl}_3$ , 400M)

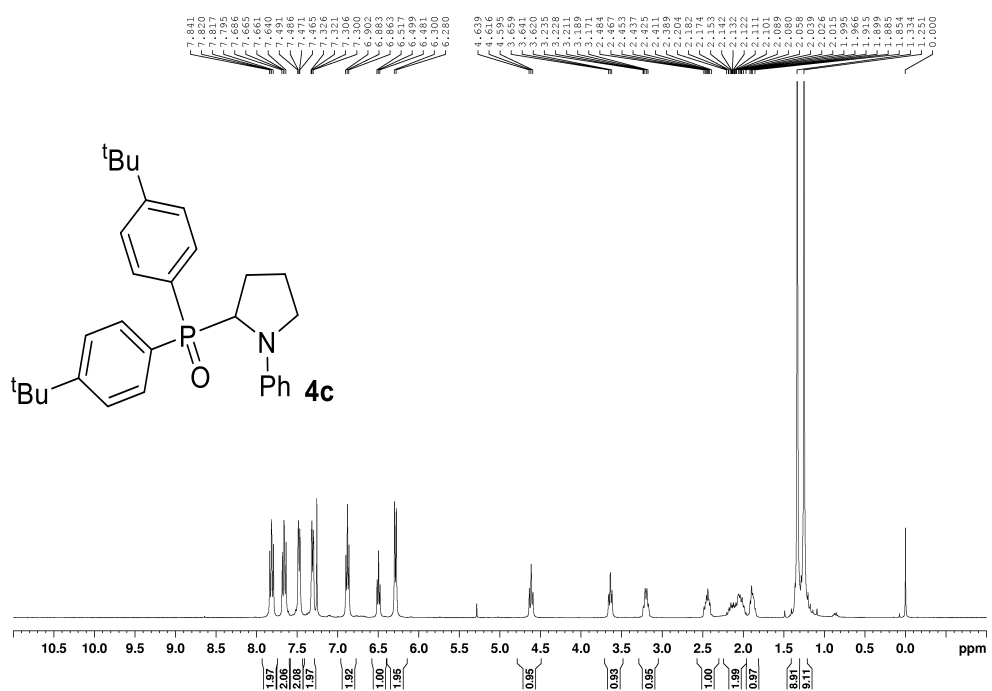

**<sup>13</sup>C NMR of 4c (CDCl<sub>3</sub>, 101M)**

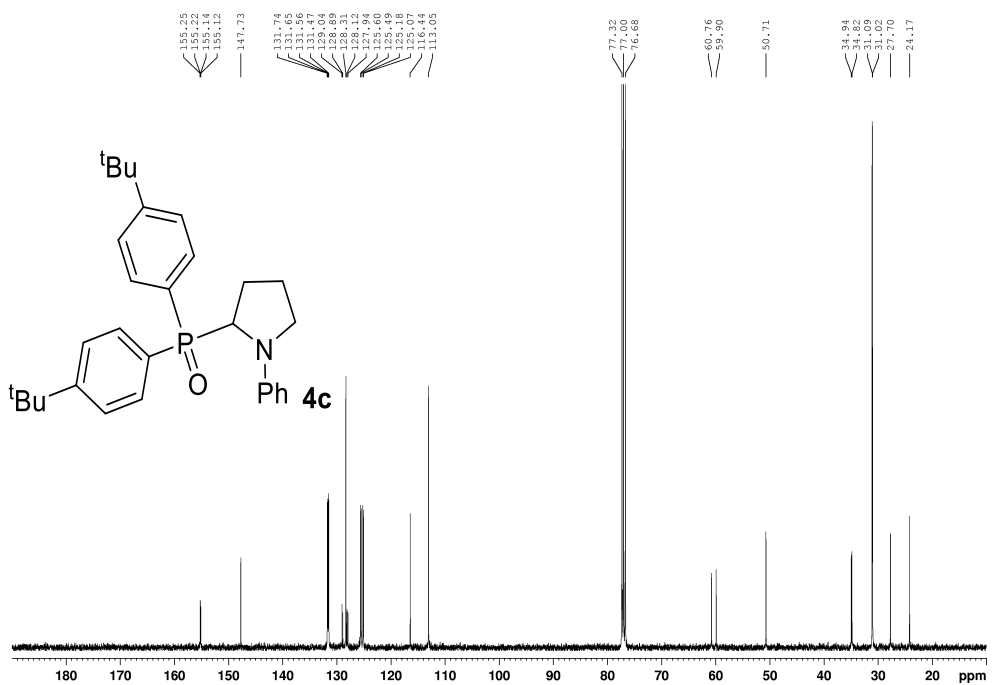

**<sup>31</sup>P NMR of 4c (CDCl<sub>3</sub>, 162 MHz)**

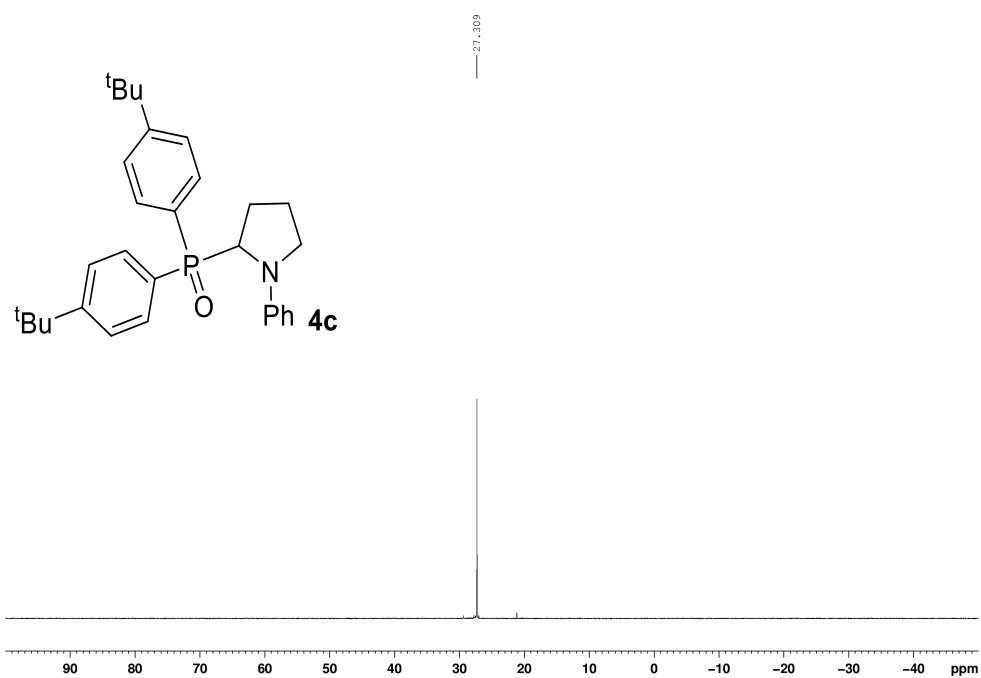

**<sup>1</sup>H NMR of 4d (CDCl<sub>3</sub>, 101M)**

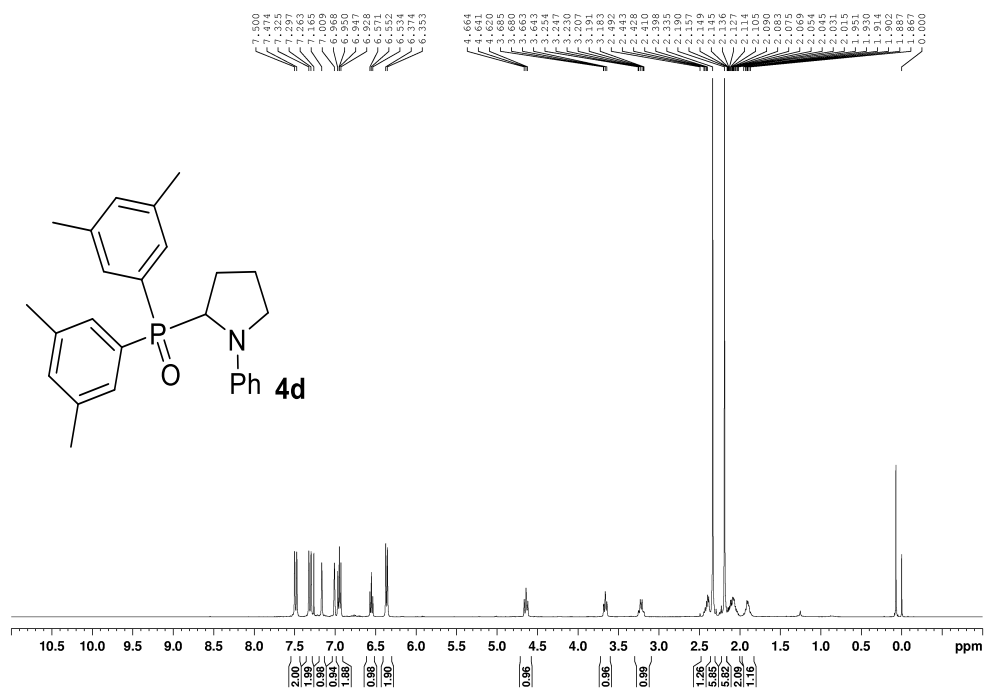

**<sup>13</sup>C NMR of 4d in CDCl<sub>3</sub>**



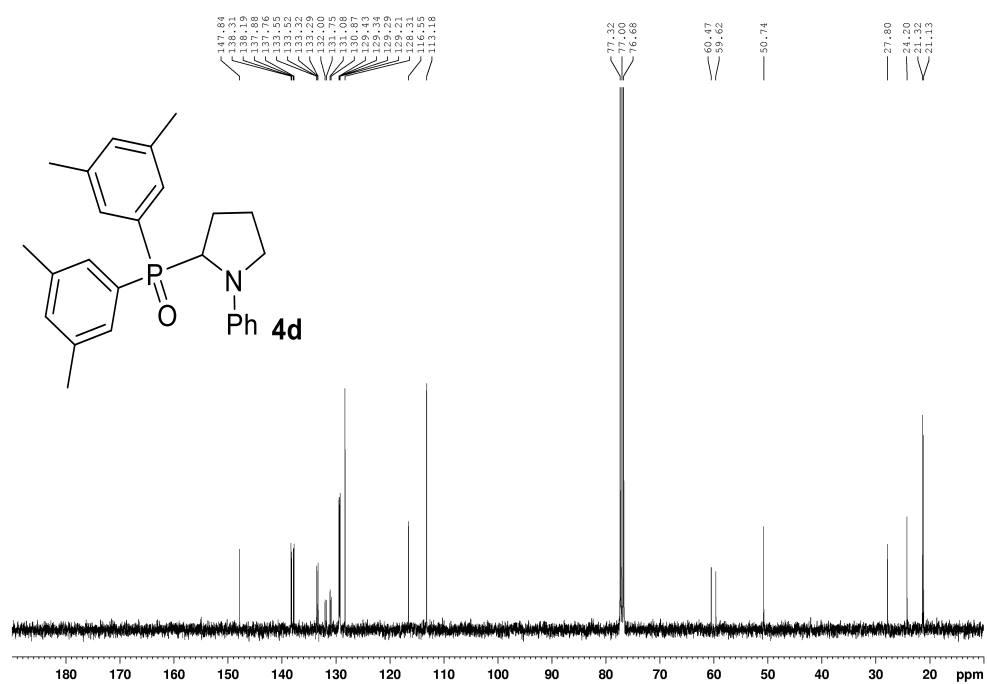

$^{31}\text{P}$  NMR of **4d** ( $\text{CDCl}_3$ , 162 MHz)

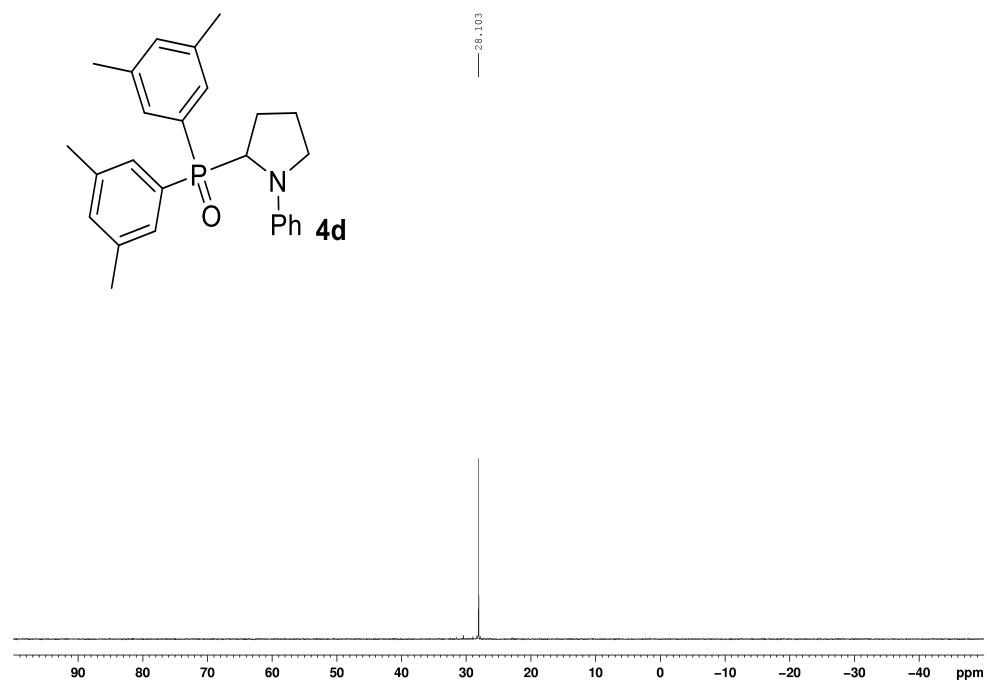

$^1\text{H}$  NMR of **4e** ( $\text{CDCl}_3$ , 400 MHz)

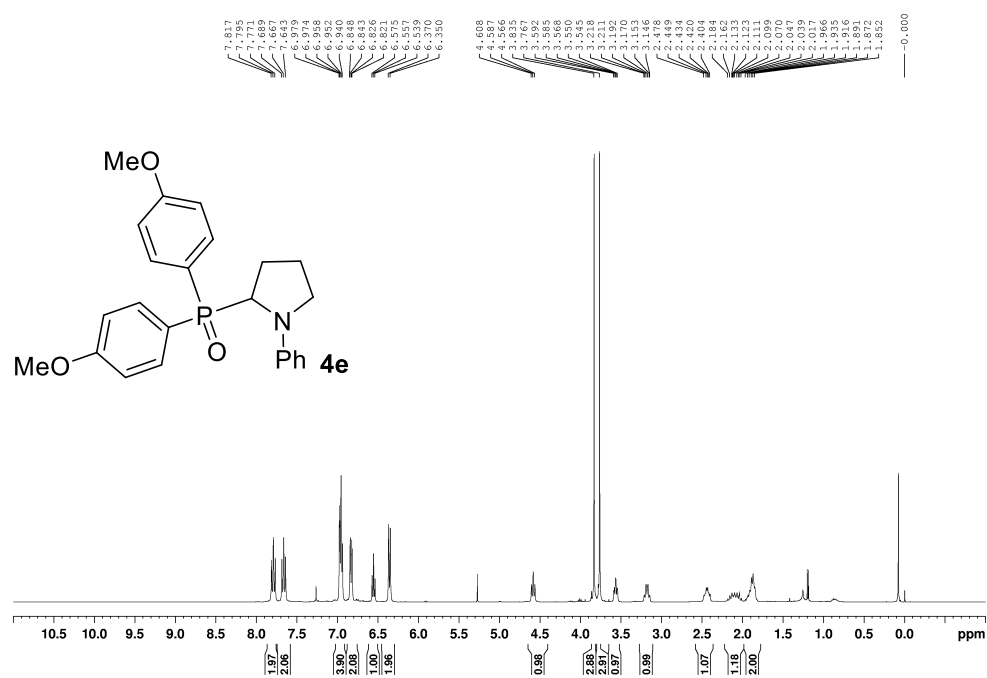

$^{13}\text{C}$  NMR of **4e** ( $\text{CDCl}_3$ , 101 MHz)

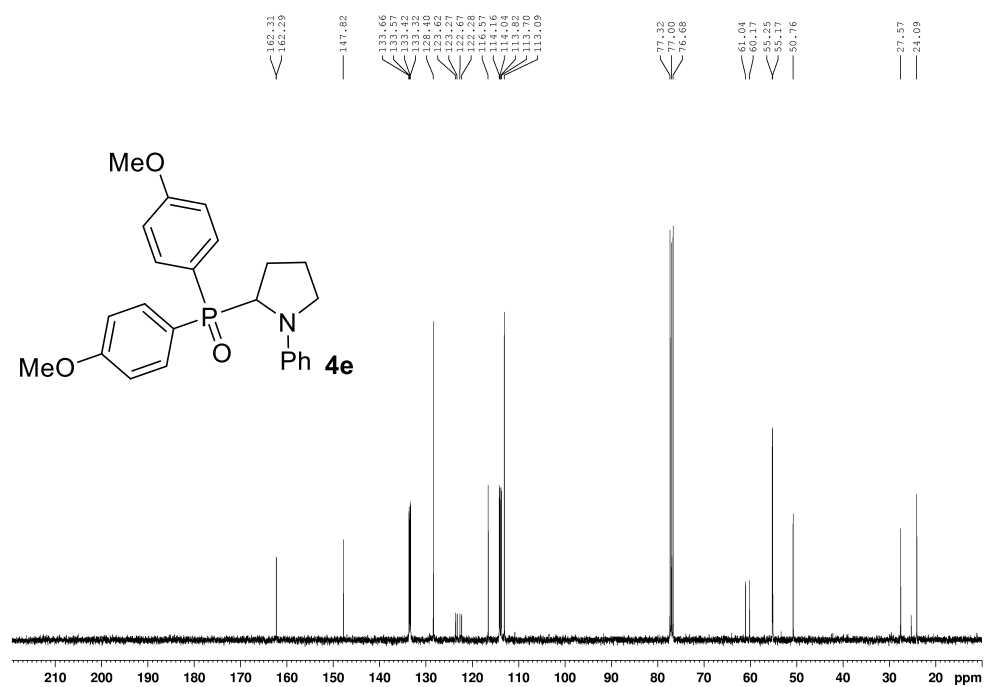

$^{31}\text{P}$  NMR of **4e** ( $\text{CDCl}_3$ , 162 MHz)

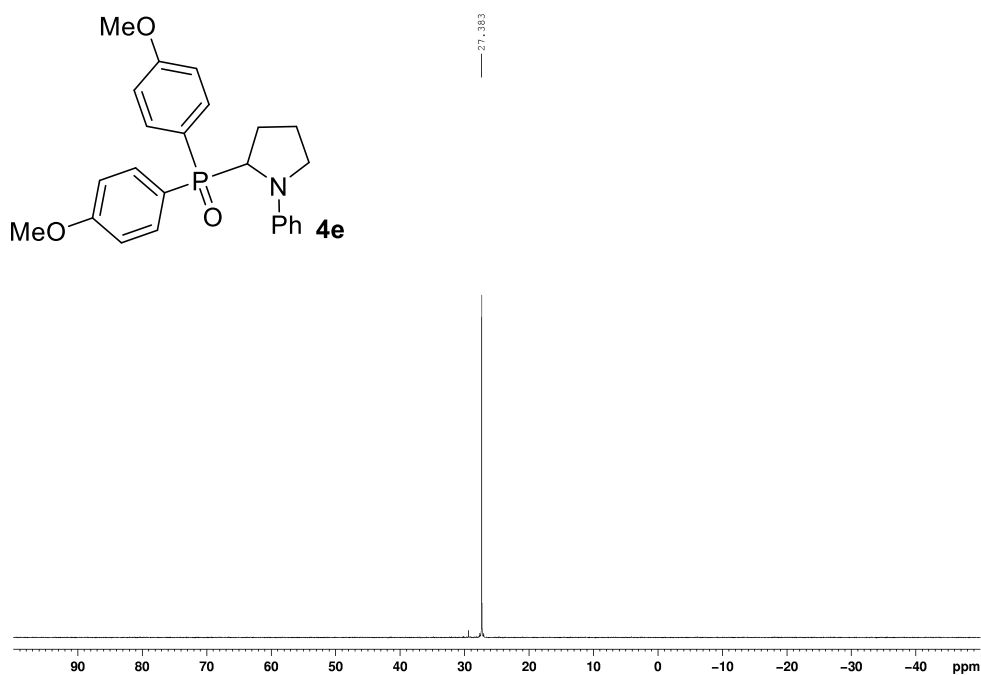

$^1\text{H}$  NMR of **4f** ( $\text{CDCl}_3$ , 400 MHz)

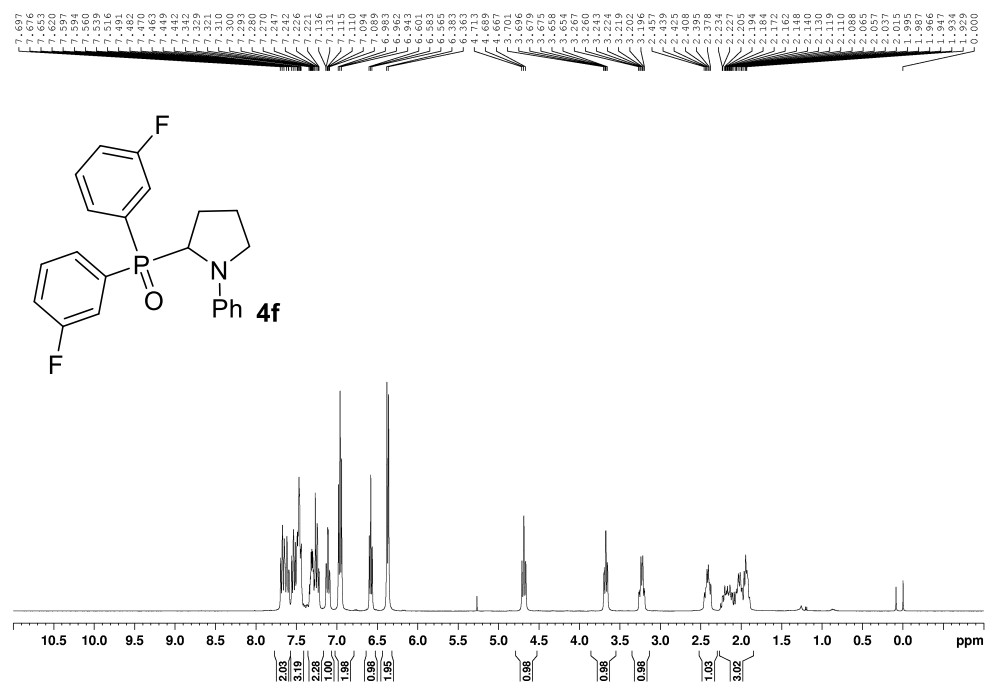

$^{13}\text{C}$  NMR of **4f** ( $\text{CDCl}_3$ , 101 MHz)

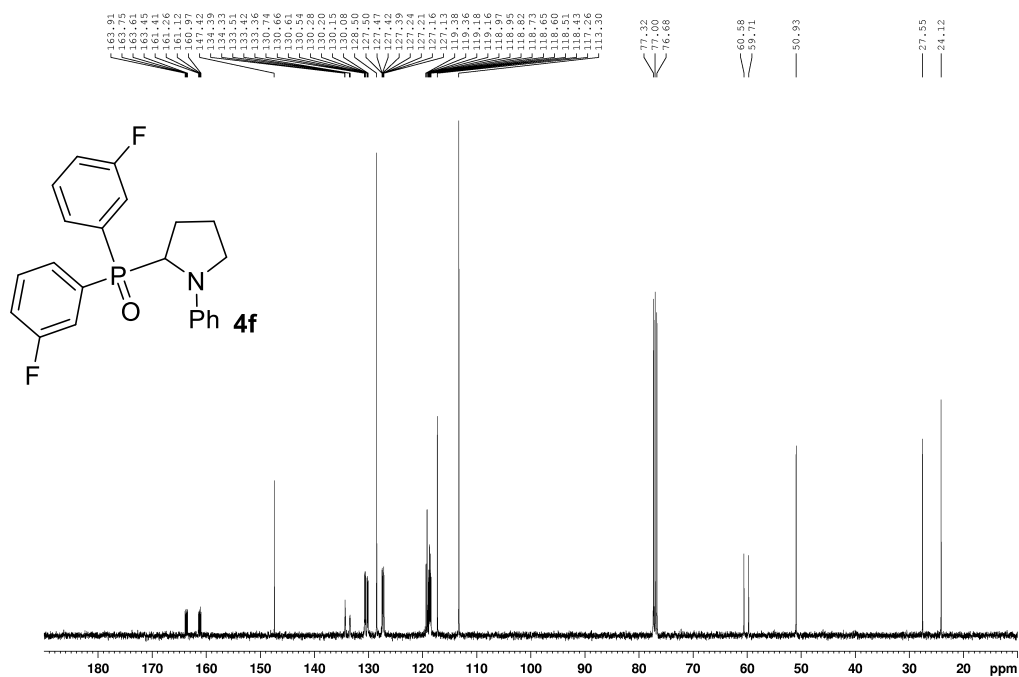

$^{31}\text{P}$  NMR of **4f** ( $\text{CDCl}_3$ , 162 MHz)

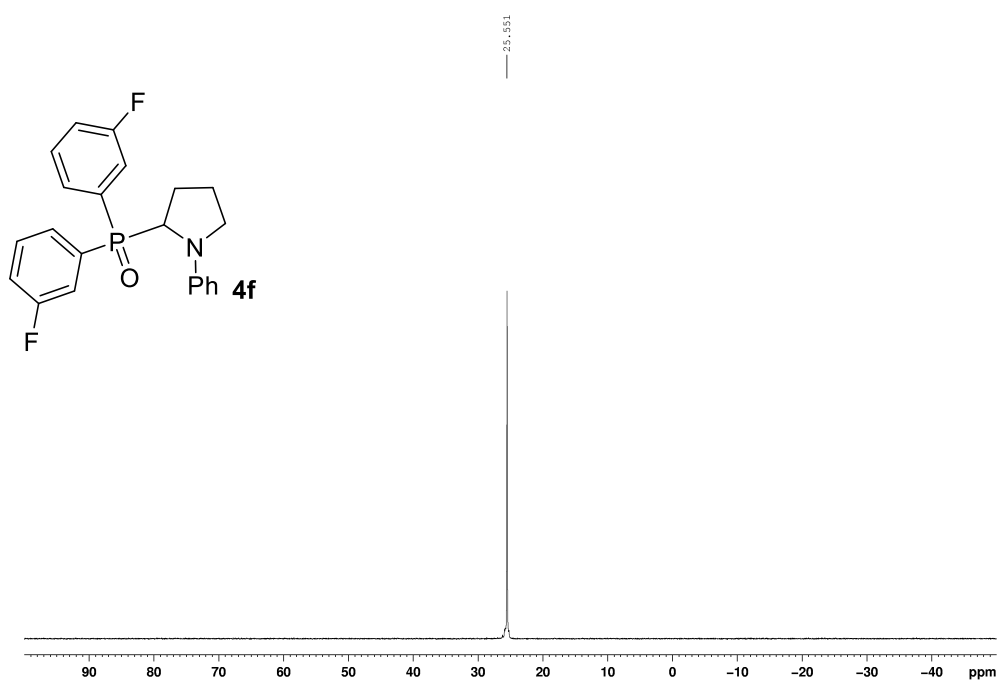

$^{19}\text{F}$  NMR of **4f** ( $\text{CDCl}_3$ , 376 MHz)

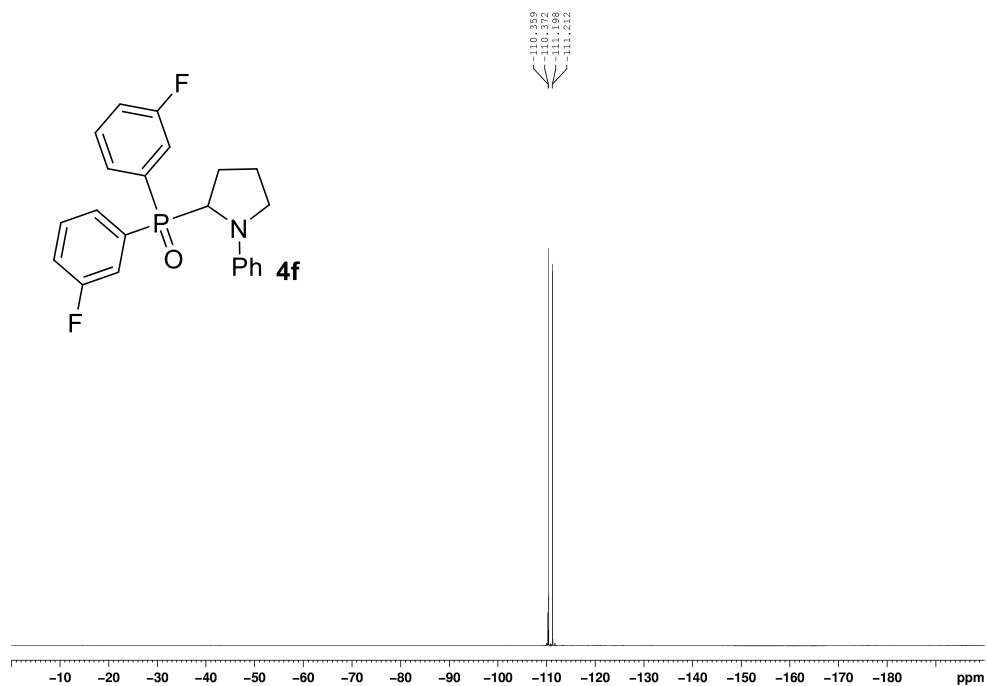

$^1\text{H}$  NMR of **4g** ( $\text{CDCl}_3$ , 400 MHz)

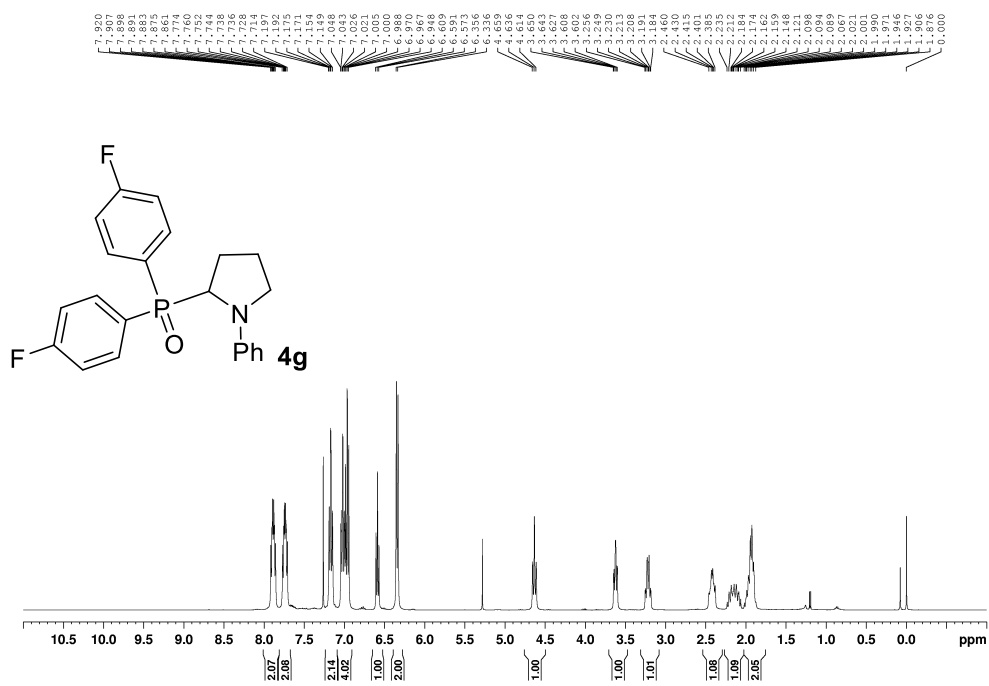

$^{13}\text{C}$  NMR of **4g** ( $\text{CDCl}_3$ , 101 MHz)

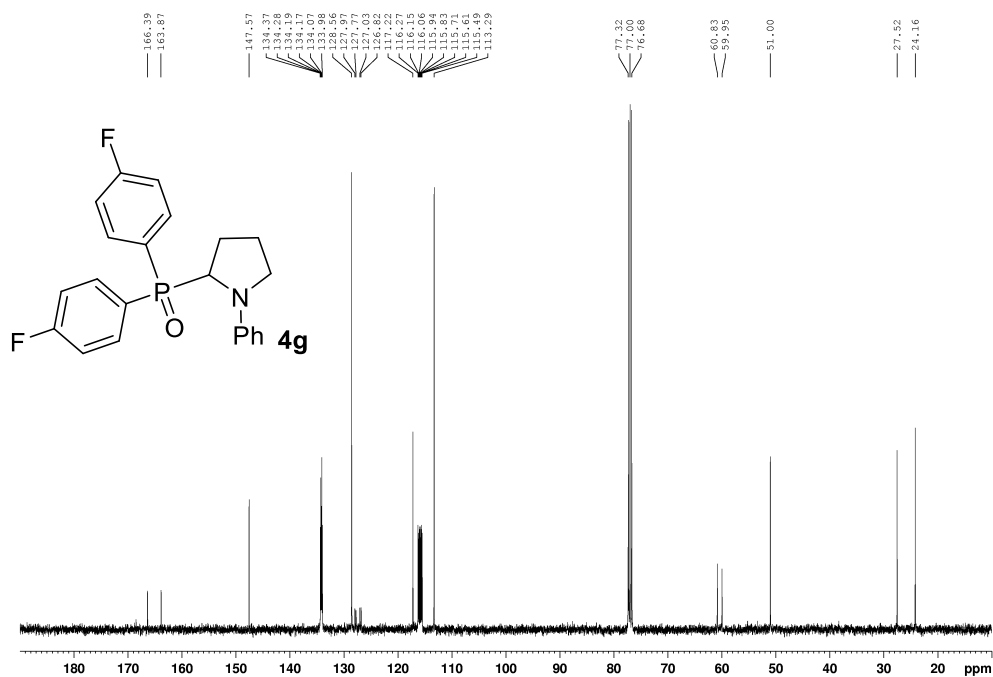

$^{31}\text{P}$  NMR of **4g** ( $\text{CDCl}_3$ , 162 MHz)

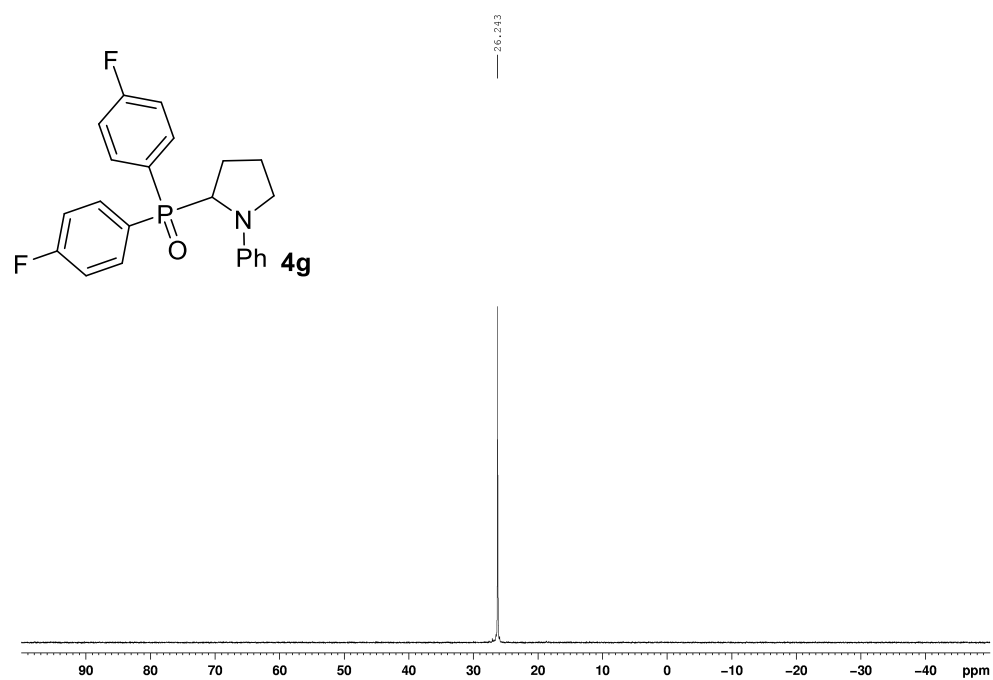

$^{19}\text{F}$  NMR of **4g** ( $\text{CDCl}_3$ , 376 MHz)

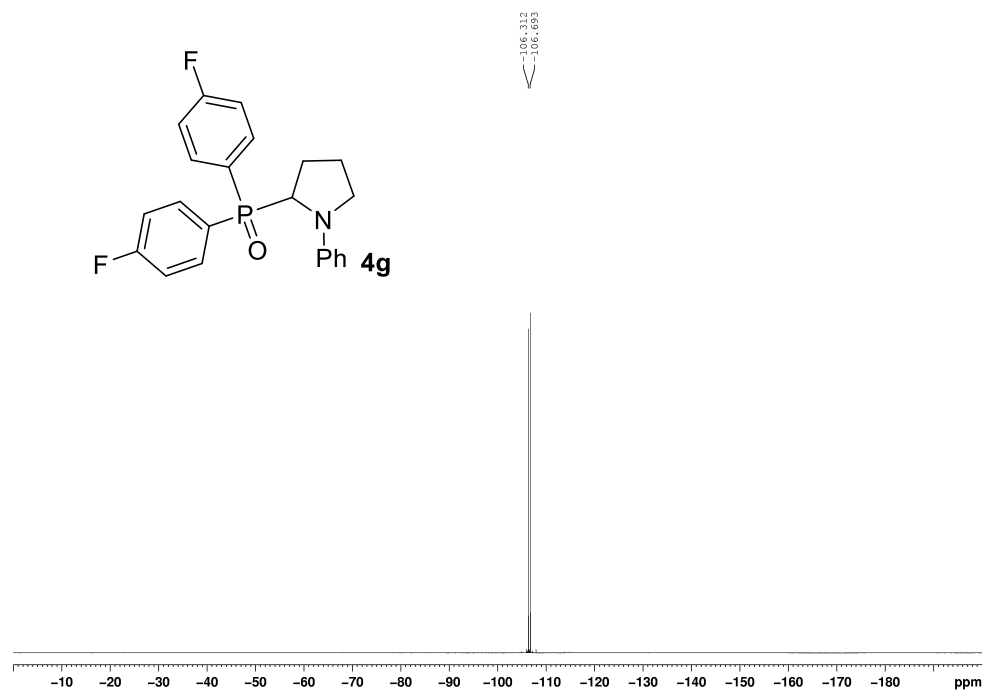

$^1\text{H}$  NMR of **4h** ( $\text{CDCl}_3$ , 400 MHz)

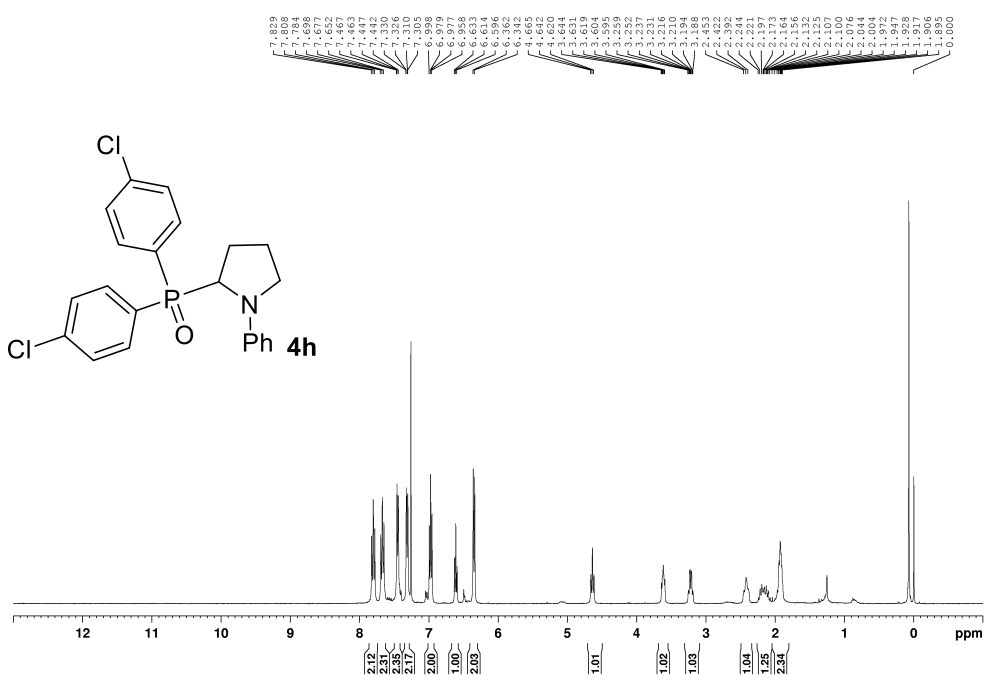

$^{13}\text{C}$  NMR of **4h** ( $\text{CDCl}_3$ , 101 MHz)

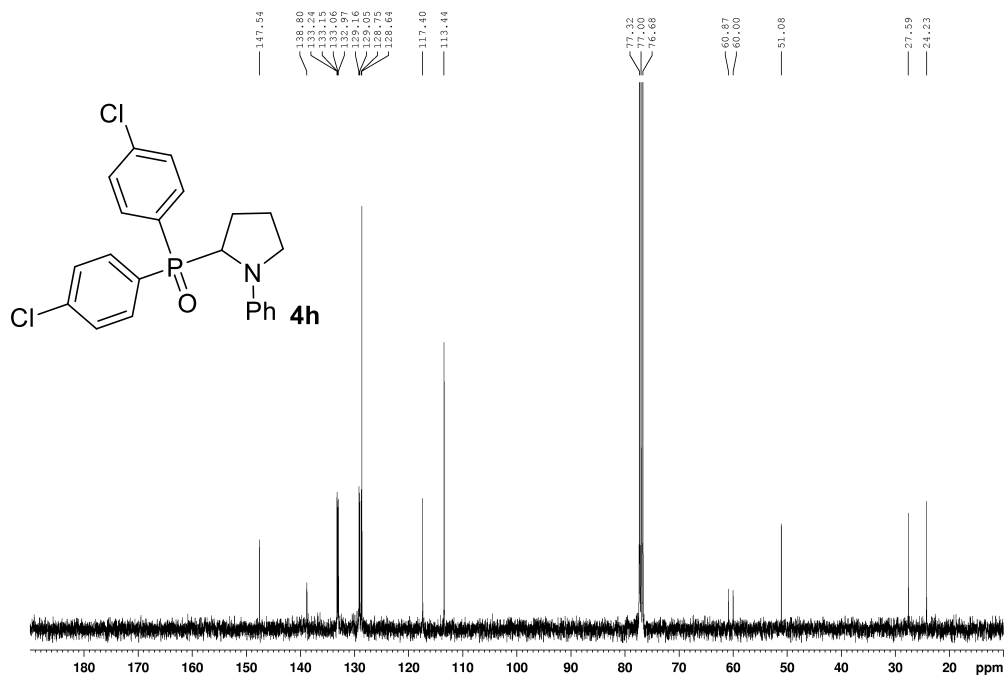

$^{31}\text{P}$  NMR of **4h** ( $\text{CDCl}_3$ , 162 MHz)

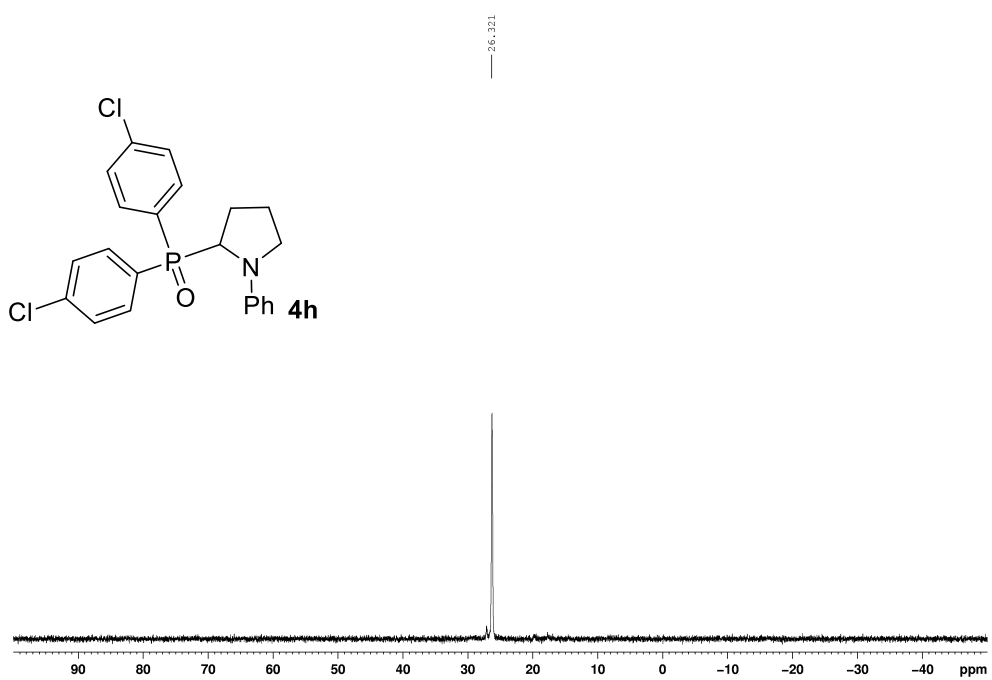



$^1\text{H}$  NMR of **4i** ( $\text{CDCl}_3$ , 400 MHz)

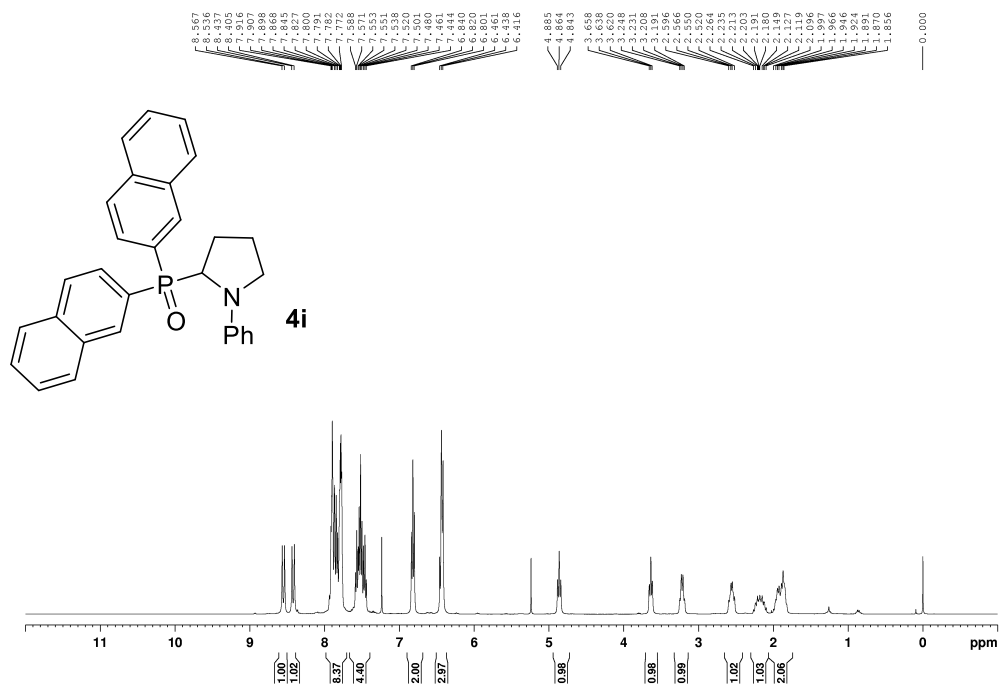

$^{13}\text{C}$  NMR of **4i** ( $\text{CDCl}_3$ , 101 MHz)

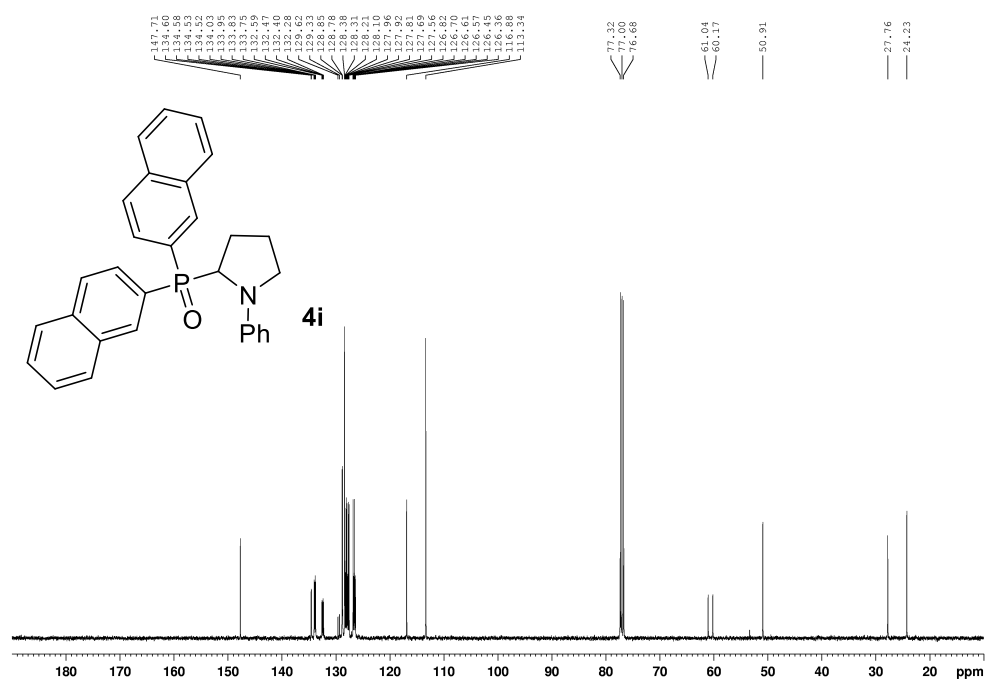

$^{31}\text{P}$  NMR of **4i** ( $\text{CDCl}_3$ , 162 MHz)

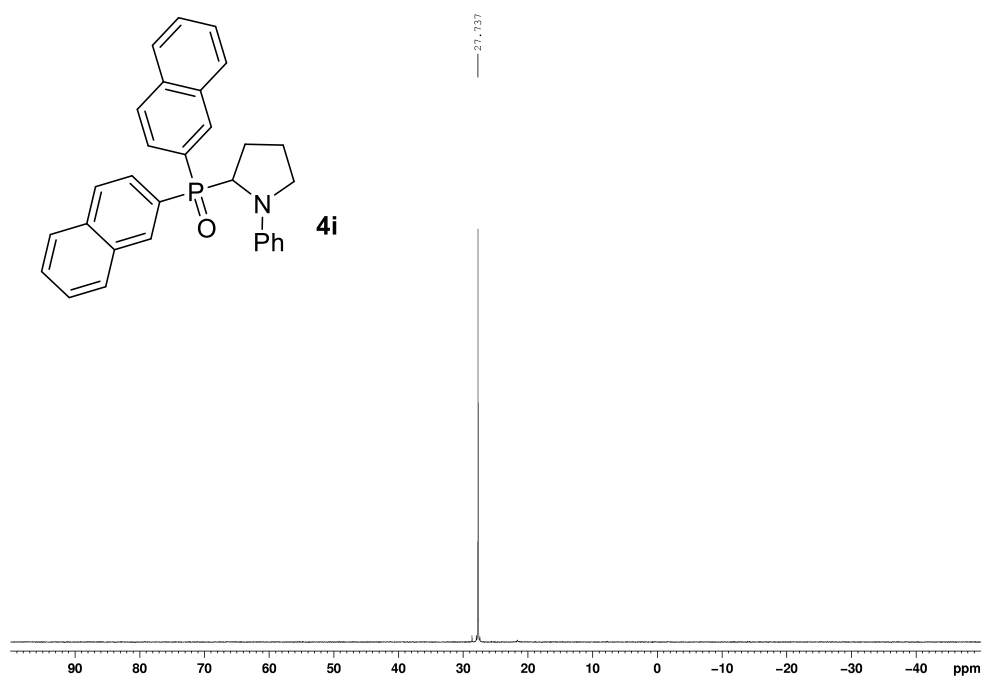

$^1\text{H}$  NMR of **4j** ( $\text{CDCl}_3$ , 600M)

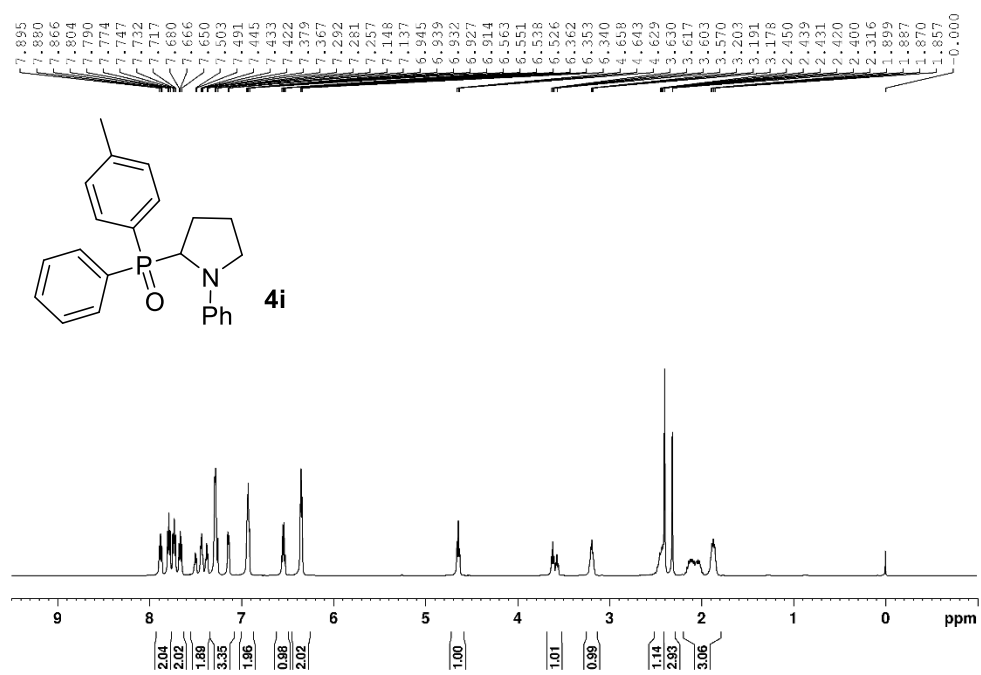

$^{13}\text{C}$  NMR of **4j** ( $\text{CDCl}_3$ , 151 MHz)

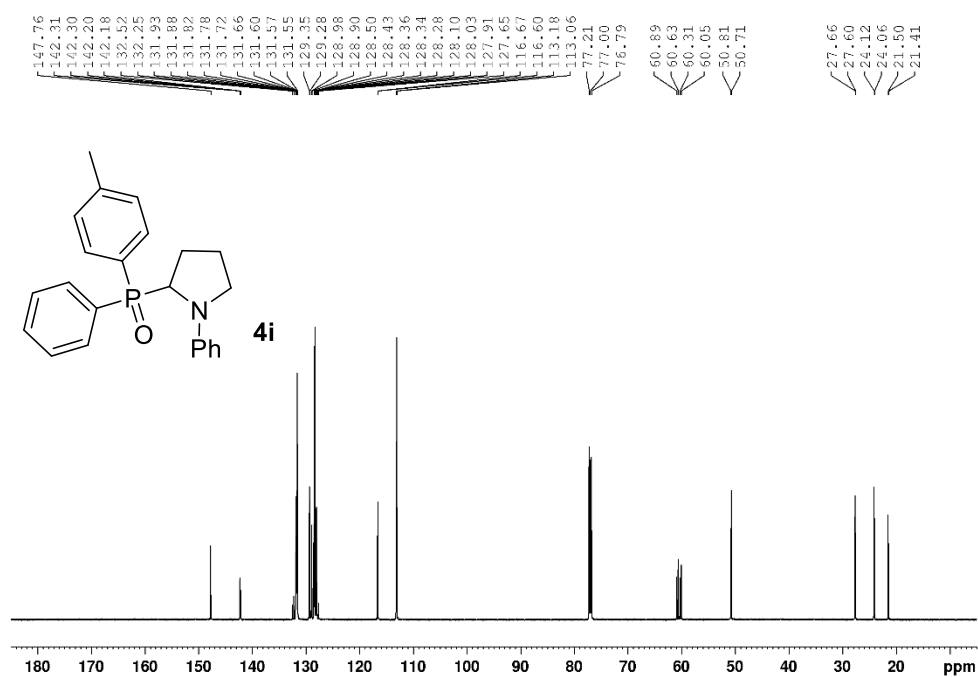

$^{31}\text{P}$  NMR of **4j** ( $\text{CDCl}_3$ , 243 MHz)

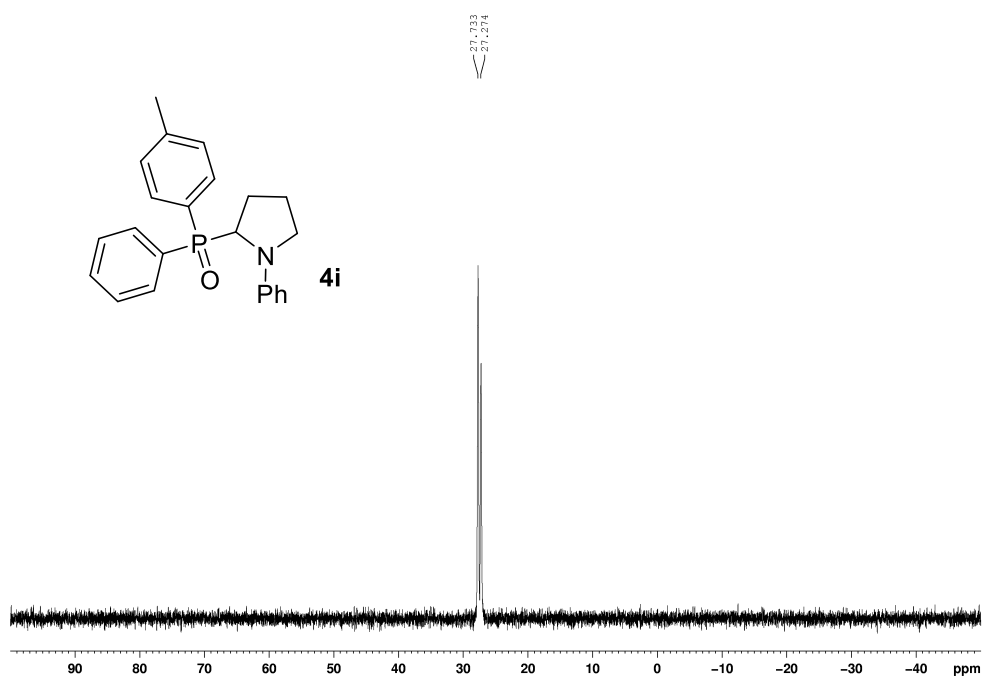

$^1\text{H}$  NMR of **4k** ( $\text{CDCl}_3$ , 600 MHz)

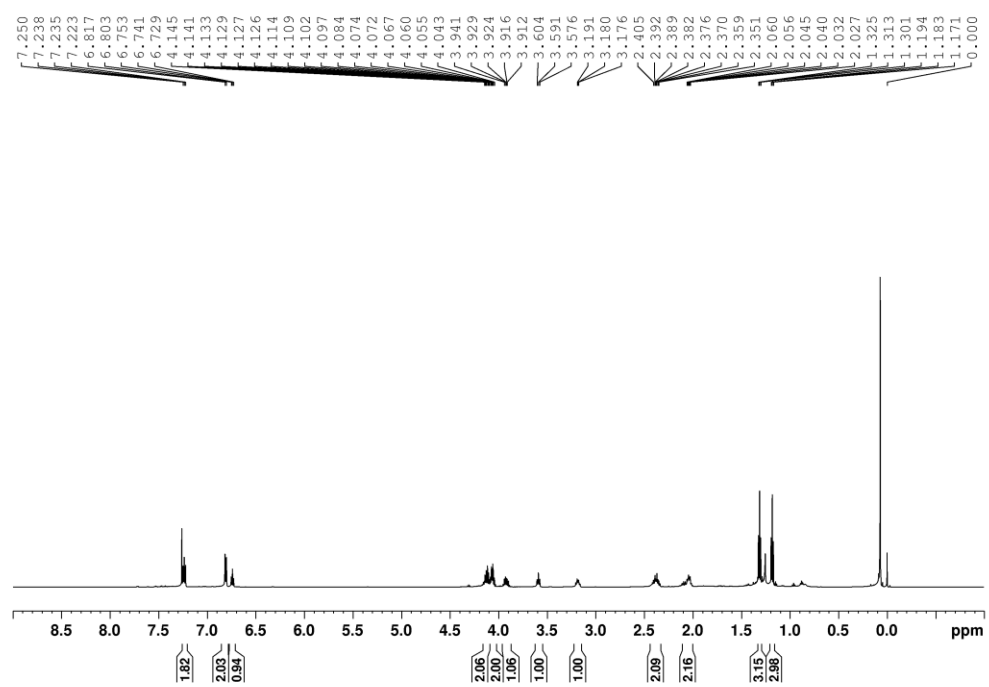

$^{13}\text{C}$  NMR of **4j** ( $\text{CDCl}_3$ , 151 MHz)

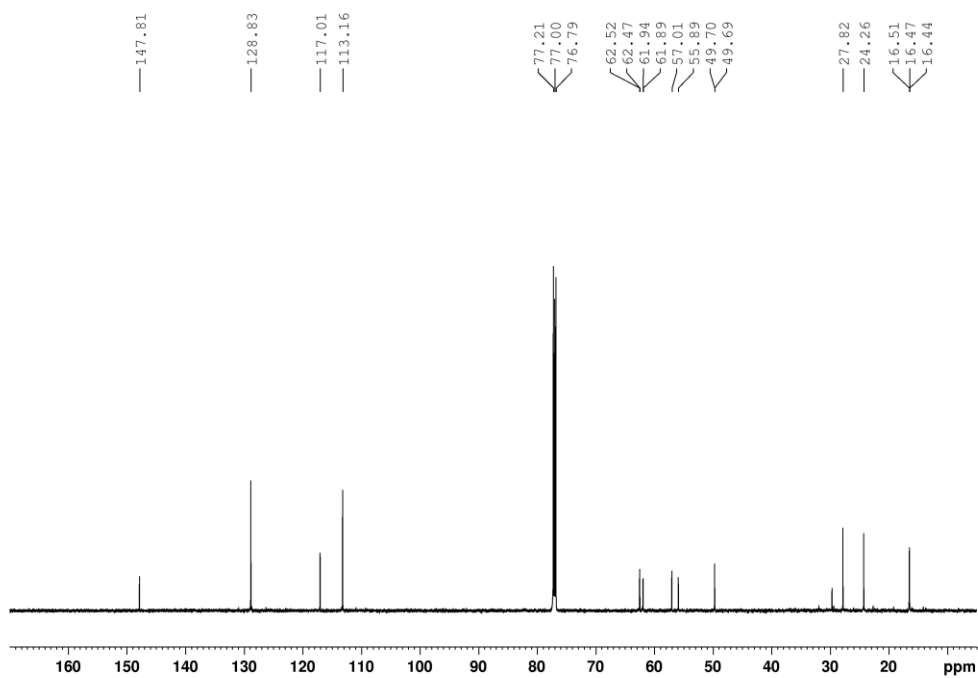

$^{31}\text{P}$  NMR of **4j** ( $\text{CDCl}_3$ , 243 MHz)

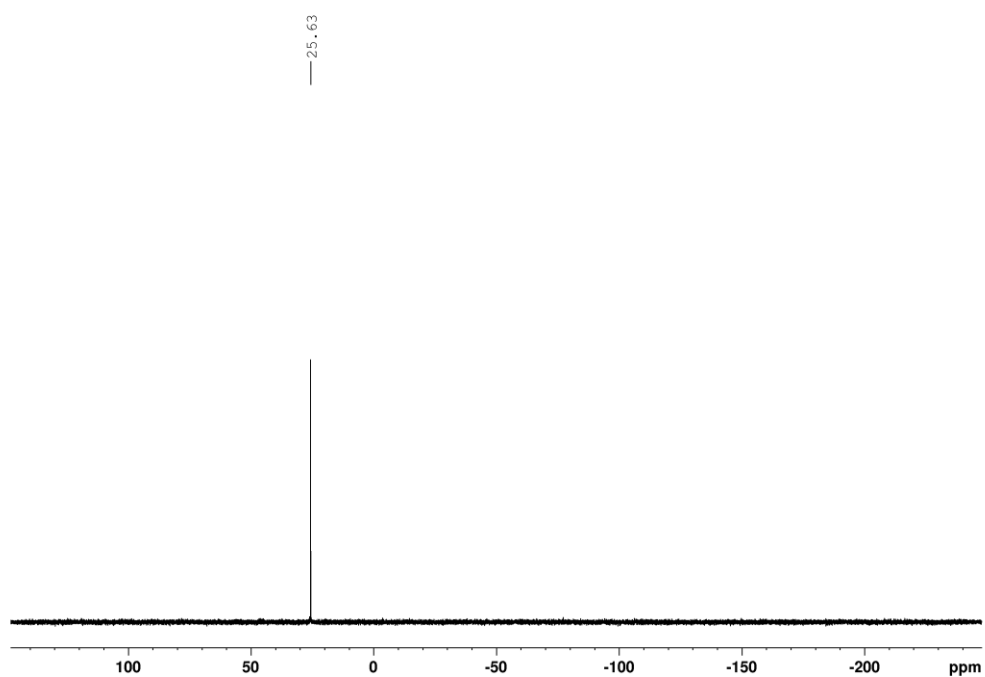

$^1\text{H}$  NMR of **5** ( $\text{D}_2\text{O}$ , 400 MHz)

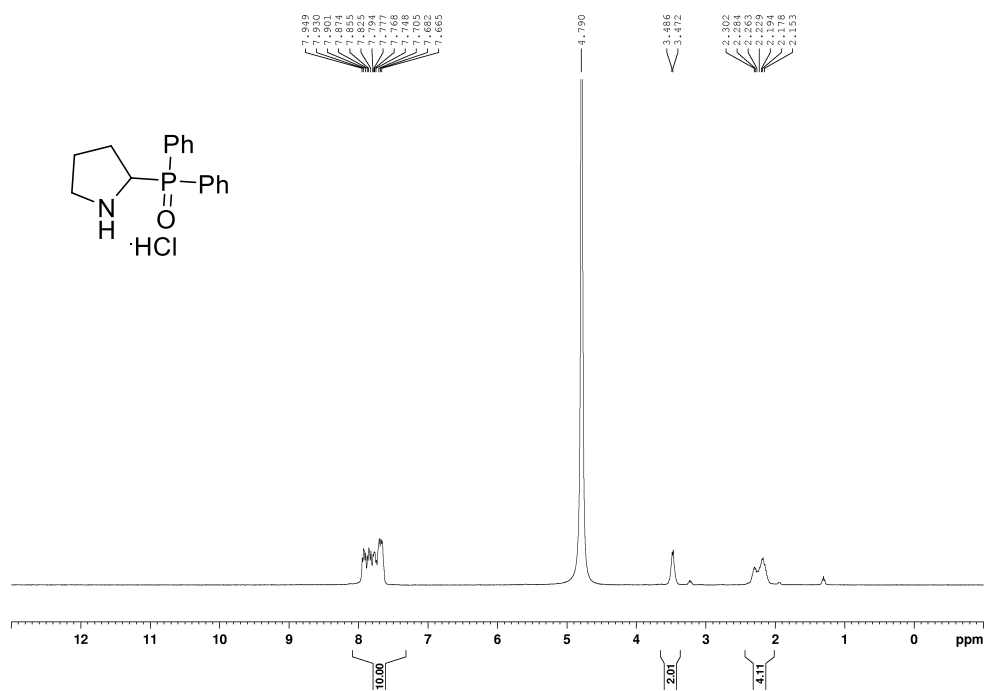

$^{13}\text{C}$  NMR of **5** in ( $\text{D}_2\text{O}$ , 101 MHz)

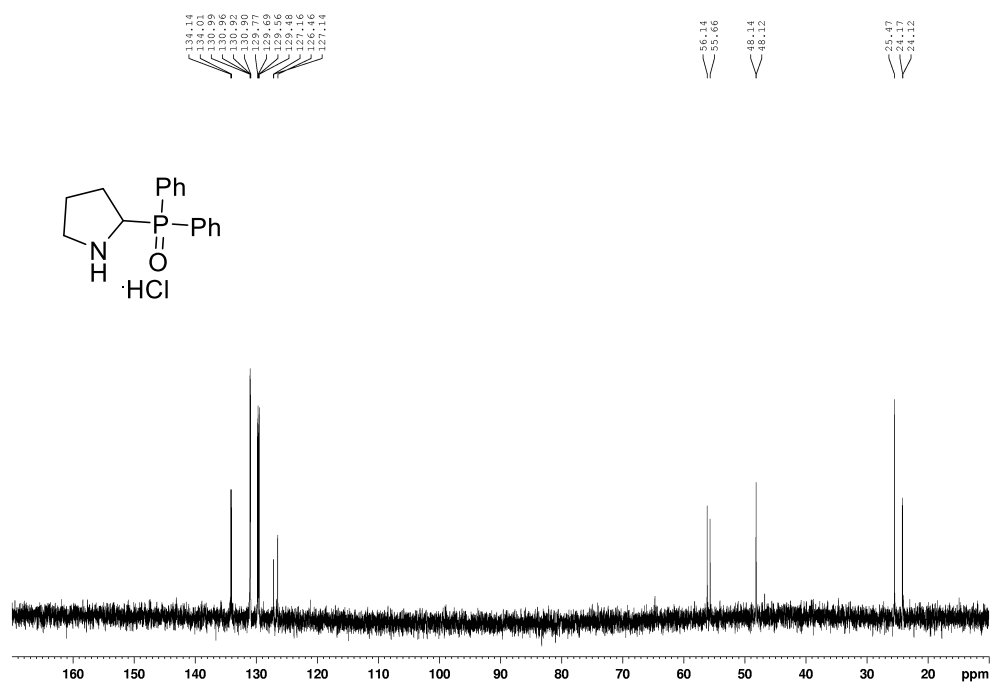

$^{31}\text{P}$  NMR of **5** ( $\text{D}_2\text{O}$ , 162 MHz)

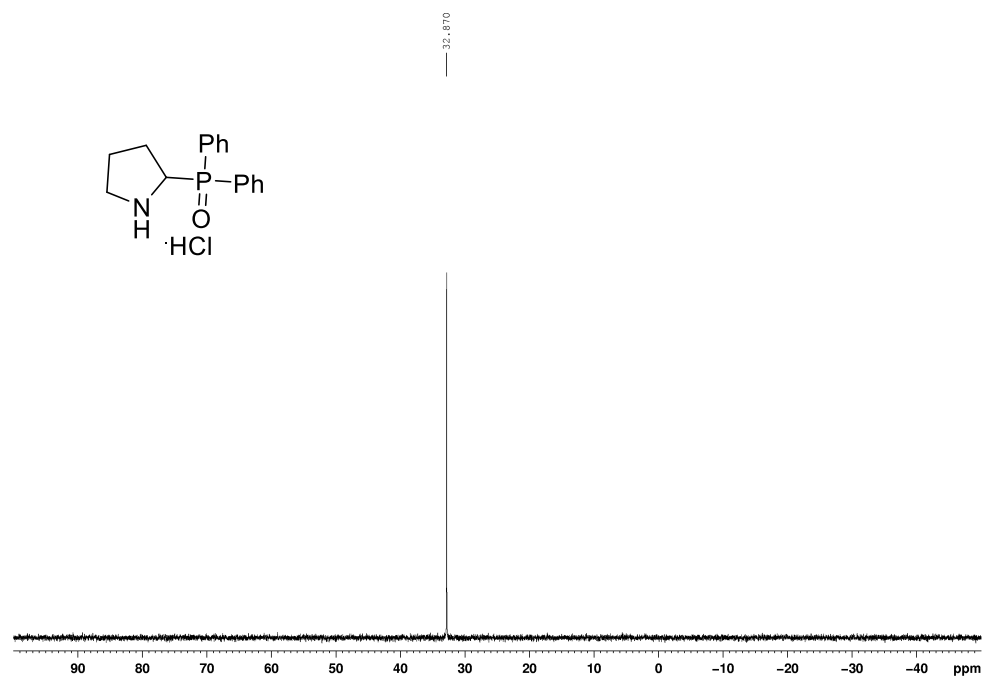

## 11. References

- [1] a) A. McNally, A.; Prier, C. K.; MacMillan, D. W. C. Discovery of an  $\alpha$ -Amino C–H Arylation Reaction Using the Strategy of Accelerated Serendipity. *Science* **2011**, *334*, 1114–1117. b) Takasu, N.; Oisaki, K.; Kanai, M. Iron-Catalyzed Oxidative C( $sp^3$ )–H Functionalization of Amines. *Org. Lett.* **2013**, *15*, 1918–1921.
- [2] C. A. Busacca, J. C. Lorenz, N. Grinberg, N. Haddad, M. Hrapchak, B. Latli, H. Lee, P. Sabila, A. Saha, M. Sarvestani, S. Shen, R. Varsolona, X. Wei, C. H. Senanayake, A Superior Method for the Reduction of Secondary Phosphine Oxides, *Org. Lett.* **2005**, *7*, 4277–4280.
- [3] Jurberg, I. D.; Peng, B.; Wostefeld, E.; Wasserloos, M.; Maulide, N., Intramolecular redox-triggered C–H functionalization. *Angew. Chem. Int. Ed.* **2012**, *51*, 1950–3.
- [4] Cismesiaa, M. A.; Yoon, T. P. Correction: Characterizing chain processes in visible light photoredox catalysis. *Chem. Sci.* **2015**, *6*, 6019–6019.
- [5] Hatchard, C. G.; Parker, C. A. *Proc. Roy. Soc. (London)* **1956**, *A235*, 518–536.
- [6] a) Kuhn, H. J.; Braslavsky, S. E.; Schmidt, R. *Pure Appl. Chemical actinometry (IUPAC Technical Report)* *Chem.* **2004**, *76*, 2105–2146. b) Monalti, M. *Chemical Actinometry. Handbook of Photochemistry*, 3rd Ed; Taylor & Francis Group, LLC. Boca Raton, FL, **2006**, 601–616.
- [7] Y. Zhao, D. G. Truhlar, The M06 suite of density functionals for main group thermochemistry, thermochemical kinetics, noncovalent interactions, excited states, and transition elements: two new functionals and systematic testing of four M06-class functionals and 12 other functionals, *Theor. Chem. Acc.* **2008**, *120*, 215–241.
- [8] S. Grimme, J. Antony, S. Ehrlich, H. Krieg, A consistent and accurate ab initio parametrization of density functional dispersion correction (DFT-D) for the 94 elements H–Pu, *J. Chem. Phys.* **2010**, *132*, 154104–15423.
- [9] A. V. Marenich, C. J. Cramer, D. G. Truhlar, Universal Solvation Model Based on Solute Electron Density and on a Continuum Model of the Solvent Defined by the Bulk Dielectric Constant and Atomic Surface Tensions, *J. Phys. Chem. B.* **2009**, *113*, 6378–6396.
- [10] M. J. Frisch, G. W. Trucks, H. B. Schlegel, G. E. Scuseria, D. J. Fox, Gaussian 09 Revision A.1. Gaussian Inc. 2009.
- [11] R. Dennington, T. Keith, J. Millam, Semichem Inc., Shawnee Mission KS, GaussView, Version 5, 2009

- [12] T. Lu, F. Chen, Multiwfn: A multifunctional wavefunction analyzer, *J. Comput.Chem.* **2012**, *33*, 580–592.
- [13] W. Humphrey, A. Dalke and K. Schulten, VMD: visual molecular dynamics, *J. Mol. Graphics*, **1996**, *14*, 33–38.
